# Supplementary material for: Expansion and Divergence of Argonaute Genes in the Oomycete Genus Phytophthora
Source: Front Microbiol. 2018 Nov 30;9:2841. doi: 10.3389/fmicb.2018.02841 (PMC6284064; doi:10.3389/fmicb.2018.02841)
Supplement: Supplementary file 5 [file Data_Sheet_3.FASTA]

>Ph_sojaAGO1
RAVKVFANHFKVNFKLAGDVYHYDVSMAEAGRSFGNGPPKALAGKIMAALMAELRRQFPDVMLVSDARKNIYAPRRLPFQQQEFGGLALPEDGRAREFSAVVKEADAIRMQQLEELFAGRLNYTPALQALDVALRHSASQRFTVVGRNLFTNAGARTLGEGAELWFGYYQSLRPTQSRLVVNLDLAATAFVEAMSVTEYLCETQSLRQMPTLAKYQHSSFSKAIRGVKVNITHRPGVRRSVNGLSKDSAENFFENDDGQRMSIVQYFQRTYNIRLRYPKLPCLHVGAPQKKNYLPMEVCHIMAGQKCRKVTDKQVANMIKFTCTPPDQRKSAIERKFREAGFSTDPTLRAFGLEVDPHMVETTGRQLPPPTIEYGGARENPRDGAWNMRGKKFNAPAQFKSWAIISMCRCSLDSILAFFKAVMSQMGQLGMRCPRTPPPILLKKNRNDSVRMMFQAAVTAATQNFNAKPEIVWMINPVSDARAYGELKLMSDTEMGIVSQCMLSKHIPKCNPQYIANILMKVNTKLGGKNGVISGPLPQVSASRTIIFGADVTHPSPMDKTRPSIAAVTASMDANFIRHASAIRAQGHRVEQMNLKDMVMELMKQFYRSTRGKPDRIVFYRDGVSEGQFHMVLNYEVTAIREACQALEKGYMPPITFVIVQKRHNTRLFPNNRNEADRSGNVKAGTVVESGICHPIENDFYLMSHAGLQGTSRPTHYHVLLDEIGFTADELQTLTYKLCYTFARCTRSVSMVPSAYYSHLVAFRARFFLV
>Ph_meloAGO1
RTVKLFANHFKVNFKLAGDVYHYDVSMAEASRSFGNGPPKALAGKIMAALMAELRRQFPDIMVVSDARKNIYTPRRLPFQQQEFGSLALPDDGRAREFSAVVKEADAIRMQQLEELFNGRLNYTPALQALDVALRHSASQRFTVVGRNLFSNAGAKTLGEGAEVWFGYYQSLRPTQNRLVVNLDLAATAFVEAMSVTDYLCETLSLRQMATLAKYQHSAFSKAIRGVKVNITHRPGVKRSVNGLSKDSAENYFENDEGQRMSIVQYFQRTYNILLRYPKLPCLHVGAPQKKNYLPMEVCHIMAGQKCRKVTDKQVANMIKFTCTPPDQRKSAIERKFREAGFSTDPTLRAFGLEVDPHMVETTGRQLPPPTIEYGGARESPRDGAWNMRGKKFNTPAQFKSWAVISMCRCSLDSIQAFFKAVMGQMGQLGMRCPRTPPPILLKKNRNDSVRMMFQAAVTAATQTFNAKPEIVWMINPVSDARAYGELKLMSDSEVGIVSQCMLSKHIPKCNPQYIANILMKVNTKLGGKNGVISGSLPQVSASRTIIFGADVTHPSPMDKTRPSIAAVTASMDANFIRHASAIRAQGHRVEQMHLKEMTMELLKQFYRSTRGKPDRIVFYRDGVSEGQFHMVLNYEVTAIREACQALEKGYMPAITFIIVQKRHNTRLFPSNRNEADRSGNVKAGTVVESGICHPIENDFYLMSHAGLQGTSRPTHYHVLLDEIGFTADELQTLTYKLCYTFARCTRSVSMVPSAYYSHLVAFRARFFLV
>Ph_fragAGO1
RAVKVFANHFKVNFKLAGDVFHYDVSMAEAGRSFGNGPPKALAGKIMAALMAELKRQFPDVALVSDARKNIYAPRRLPFQQQNFGSLLLPDDGRAREFSAVVKEADAIRMLQLEELFAGRLNYTPALQALDVALRHSVSQRFTVVGRNLFSNAGAKTLGEGAELWFGYYQSLRPTQNRLVVNLDLAATAFVEAMDVTDFLCETLALRQMPALAKYQHSAFSKAVRGVKVNITHRPGVKRSVNGLSRDSADNFFENDEGQRMSIAQYFQKTYNIRLRYPKLPCLHVGAPQKKNYLPMEVCHIMAGQKCRKVTDKQVANMIKFTCTPPDQRKRAIEQKFREAGFNTDPTLRAFGLEVDPNMVETTGRQLPPPAIEYGGARESPRDGAWNMRGKKFNTPAQFKSWAVISMCRCSLGSIQAFFKAVMGQMGQLGMRCPKTPPPILLKKNRQDSVRGMFQAAVTAATQTFKVKPDIVWMINPVSDARAYGDLKVMSDTEVGIVSQCMLSKHIPKCNPQYIANILMKVNTKLGGRNGIISGPLPQVSASRTIIFGADVTHPSPMDKTRPSIAAVTASMDANFIRHASAIRAQGHRVEQENLKDMTIELMKQFYQSTRGKPDRIVFYRDGVSEGQFHMVLNDEVTAIREACQALEKGYMPPITFVIVQKRHNTRLFPSNRNEADRSGNVKAGTVVESGICHPIENDFYLMSHAGLQGTSRPTHYHVLLDEIGFTADELQTLTYKLCYTFARCTRSVSMVPSAYYSHLVAFRARFFLV
>Ph_rubiAGO1
RAVKVFANHFKVNFKLAGDVFHYDVSMAEAGRSFGNGPPKALAGKIMAALMAELKRQFPDVALVSDARKNIYAPRRLPFQQQSFGSLALPDDGRAREFSAVVKEADAIRMQQLEELFAGRLNYTPALQALDVALRHSASQRFTVVGRNLFSNAGAKTLGEGAELWFGYYQSLRPTQNRLVVNLDLAATAFVEAMDVTDFLCETLALRQMPALAKYQHSAFSKAVRGVKVNITHRPGVKRSVNGLSRDSADNFFENDEGQRMSIAQYFQKTYNIRLRYPKLPCLHVGAPQKKNYLPMEVCHIMAGQKCRKVTDKQVANMIKFTCTPPDQRKRAIEQKFREAGFNTDPTLRAFGLEVDPNMVETTGRQLPPPAIEYGGARESPRDGAWNMRGKKFNAPAQFKSWAVISMCRCSLGSIQAFFKAVMGQMGQLGMRCPKTPPPILLKKNRQDSVRGMFQAAVTAATQTFKVKPDIVWMINPVSDARAYGDLKVMSDTEVGIVSQCMLSKHIPKCNPQYIANILMKVNTKLGGRNGIISGPLPQVSASRTIIFGADVTHPSPMDKTRPSIAAVTASMDANFIRHASAIRAQGHRVEQENLKDMTIELMKQFYQSTRGKPDRIVFYRDGVSEGQFHMVLNYEVTAIREACQALEKGYMPPITFVIVQKRHNTRLFPSNRNEADRSGNVKAGTVVESGICHPIENDFYLMSHAGLQGTSRPTHYHVLLDEIGFTADELQTLTYKLCYTFARCTRSVSMVPSAYYSHLVAFRARFFLV
>Ph_niedAGO1
RAVKVFANHFKVNFKLAGDVFHYDVSMAEAGRSFGNGPPKALAGKIMAALMAELRRQFPDVMLVSDARKNIYAPRRLPFQQQEFGGLALPDDGRAREFSAVVKEADAIRMQQLEELFAGRLNYTPALQALDVALRHSASQRFTVVGRNLFSNAGAKTLGEGAELWFGYYQSLRPTQSRLVVNLDLAATAFVEAMSVTDYLCETQSLRQVPTLAKYQHSAFSKAIRGVKVNITHRPGVRCSVNGLSKNSAENFFENDEGQRMSIVQYFQRTYNIRLRYPKLPCLHVGAPQKKNYLPMEVCHIMAGQKCRKVTDKQVANMIRFTCTPPDRRKSAIERKFREAGFSTDPTLRAFGLEVDPHMVETTGRQLPPPTIEYGGARENPRDGAWNMRGKKFNAPAQFKSWAVISMCRCSLDSIQAFFKAVMSQMGQLGMRCPRTPPPILLKKNRNDSVRMMFQAAVTAATQTFKAKPEIVWMINPVSDARAYGELKLMSDTEMGIVSQCMLSKHIPKCNPQYIANILMKVNTKLGGKNGVISGPLPQVSASRTIIFGADVTHPSPMDKTRPSVAAVTASMDANFIRHASAIRAQGHRVEQMNLKDMVMELMKQFYRSTRGKPDRIVFYRDGVSEGQFHMVLNYEVTAIREACQALEKGYMPPITFVIVQKRHNTRLFPSNRNEADRSGNVKAGTVVESGICHPIENDFYLMSHAGLQGTSRPTHYHVLLDEIGFTADELQTLTYKLCYTFARCTRSVSMVPSAYYSHLVAFRARFFLV
>Ph_pisiAGO1
RAVKVFANHFRVNFKLAGDVYHYDVSMAEAGRSFGNGPPKALAGKIMAALMAELRRQFPDVMLVSDARKNIYAPRRLPFQQQEFGGLALPEDGRAREFSAVVKEADAIRMQQLEELFAGRLNYTPALQALDVALRHSASQRFTVVGRNLFGNAGARTLGEGAELWFGYYQSLRPTQSRLVVNLDLAATAFVEAMSVTDYLCETQSLRQMPTLAKYQHSAFSKAIRGVKVNITHRPGVRRSVNGLSKDSAENFFENDEGQRMSIVQYFQRTYNIRLRYPKLPCLHVGAPQKKNYLPMEVCHIMAGQKCRKVTDKQVANMIKFTCTPPDQRKSAIERKFREAGFSTDPTLRAFGLEVDPHMVETTGRQLPPPTIEYGGARENPRDGAWNMRGKKFNTPAQFKSWAIISMCRCSLDSIQAFFKAVMSQMGQLGMRCPRMPPPILLKKNRNDSVRMMFQAAVTAATQTFKAKPEIVWMINPVSDARAYGELKLMSDTEMGIVSQCMLSKHIPKCNPQYIANILMKVNTKLGGKNGVISGPLPQVSASRTIIFGADVTHPSPMDKTRPSVAAVTASMDANFIRHASAIRAQGHRVEQMNLKDMVMELMKQFYRSTHGKPDRIVFYRDGVSEGQFHMVLNFEVTAIREACQALEKGYMPPITFVIVQKRHNTRLFPSNRNEADRSGNVKAGTVVESGICHPIENDFYLMSHAGLQGTSRPTHYHVLLDEIGFTADELQTLTYKLCYTFARCTRSVSMVPSAYYSHLVAFRARFFLV
>Ph_piniAGO1A
---------------------------------------------------------------------------------QEFDGLQLPDDERARAFSAVVKEADAIRMQQLEELFAGRLNYTPALQALDVALRHSASQRFTVVGRNLFGPNGAKSLGERAELWFGYFQSIRATQNRLVVNLDLAATAFVEAMSVLEYLGETLSLRDTPTLAKYQLSAFSKAVRGVKVNITHRPGVRRSVNGLSKESAERFFENDDGERMSIVQYFQRTYNIRLRYPKLPCLHVGAPQKKNYLPMEVCHILAGQKCRKVTDKQVANMIKFTCTPPDQRKRAIEQKFREAGFSSDPTLRAFGLEVDPNM----------------------------------------------------------------------------------------------------AATQTFKTPPQVVWMINPTTDAHAYGELKLMSDTEVGIVSQCMLAKHIPKCSPQYIANILMKVNTKLGGKNGVISGPLPRVSATRTIIFGADVTHPSPMDKTRPSIAAVTASMDANFIRHASAIRAQGHRVEQMNLKDMVMELLKQFYRKTQGKPDRIVFYRDGVSEGQFHMVLNYEVTAIREACQELEKDYLPPITFVIVQKRHNTRLFPTNRNEADRSGNVKAGTVMDTGICHPIENDFYLMSHAGLQGTSRPTHYHVLLNEIGFTADELQTLTYKLCYTFARCTRSVSM-------------------
>Ph_pluvAGO1
KAVKLHANHFKVNLKLAGDVYHYDVVMAEAGRSFGNGPPKALANKIMAALMAELKRQFPDFHLVSDARKNIYAPKRLPFQLQEFGALQLPDDGRAREFSAVVKEADAIRMQQLDELFAGRLNYTPALQALDVALRHSASQRFTVVGRNLFSGNGAKSLGEGSELWFGYFQSLRATQNRLVVNLDLAATAFVEEMDVLDFLCESLSMRQMPTLAKYQHSAFSKAIRGVKVNITHRPGVQRSVNGLSKMSAAEFFENDEGQRMSIVQYFQKTYNLRLRYPKLPCLHVGAPQKKNYLPMEVCHIMGGQKCRKVTDNQVANMIKFTCTPPDQRKRSVEQKFREAGFNTDPTLRAFGLEVEPRMVETTGRQLPPPTIEYGGARENPRDGAWNMRGKKFNTPAHLTSWAVISMAFCNKTSIENFFKAVMAQMGQLGMRCPPKLPPILQKQRREDSVRGMFQAAVKEATQTFKTAPQIIWMINPRLDAHAYGELKLMSDTEMGILSQCMLAKHIPKCNPQYIANILMKVNTKQGGKNGIIGGPLPRVSASRTIFFGADVTHPSPMDKTRPSIAAVTASMDPNFIRHASTIRAQGHRVEQMNLKDMVVELMKQFYRQTRGKPDRIVFYRDGVSEGQFHMVLNYEVTAIREACQALEVGYLPPITFVIVQKRHNTRLFPDNSKDADRSGNVKAGTVVDTGICHPIENDFYLMSHAGLQGTSRPTHYHVLLNEIGFTADELQTLTYKLCYTFARCTRSVSMVPSAYYSHLVALRARFFLV
>Ph_totaAGO1
--------------------------MAESGRSFGNGPPKALANKIMAALMAELKRQFPDVLLVSDARKNIYAPKRLPFQLQEFTGLQLPEDGRAREFSAVVKEADAIRMQQLEELFAGRLNYTPALQALDVALRHSASQRFTVVGRNLFNGTGAKSLGEGAELWFGYFQSLRATQNRLVVNLDLAATAFVEEMDVVDYLCETLSMRQMPSLAKYQHSAFSKAVRGVKVNITHRPGVRRSVNGLSRESAEKFFENDDGERMSVVQYFQKTYNIRLRYPKLPCLHVGAPQNKNYLPMEVCHIMAGQKCRKVTDKQVANMIKFTCTPPDQRKRAIEKKFREAGFNTDPTLRAFGLEVDPRMVETTGRQLPPPTIEYGGARENPRDGAWNMRGKRFNTPAHFKSWAIISMARCSLGDIQKFFKAVMAQMGQLGMRCPTTPPPILLKQNREDTVRGMFQAAAKSANQTFKTPPQIVWMINPVSDAHAYGELKLMSDSEVGIVSQCMLAKHIPKCNPQYIANILMKVNTKLGGKNGVISGPLPRVSASRTIIFGADVTHPSPMDKTRPSIAAVTASMDPNFIRHASTIRAQGHRVEQMNLKEMTMELMKQFYRQTHGKPDRIVFYRDGVSEGQFQMVLNYEVTAIREACQALEVGYMPPITFVIVQKRHNTRLFPDNPKDADRSGNVKAGTVVETGICHPIENDFYLMSHAGLQGTSRPTHYHVLLNEIGFTADELQTLTYKLCYTFARCTRSVSMVPSAYYSHLVAFRARFFLV
>Ph_litcAGO1
RPVKVYANHFKVNFNLAGDVFHYDVMMAEAGRSFGNGPPKTLANKIMAALMTELRRQFPDVLLVSDARKNIYAPRRLPFQVQEFANLQLPDDGRARDFSAVVKEADAIRMQQLDELFAGRLNYTPALQALDVALRHSAAQRFTVVGRNLFSGNGAKSLGEGAELWFGYFQSLRATQNRLVVNLDLAATAFVEEMDVLDFLCETLSMRQMPTLAKYQHSAFSKAIRGVKVNITHRPGVRRSVNGLSKESADKFFENDDGHRVSIVQYFQQTYNIRLRYPKLPCLHVGAPQKKNYLPMEVCHIMAGQKCRKVTDNQVANMIRFTCTPPDQRKRSIEQKFREAGFDTDPTLRAFGLNVEPRMVETTGRQLPPPTIEYGGTRENPRDGAWNMRGKKFNTPAQFTSWAIISMCRCDLGSIQKFFKAVIAQMGQLGMRCPKAMPPILLKQRREDSVRGMFQAAVQAATQTFKTSPQLVWMINPGLDAHAYGELKIMSDTEMGIVSQCMLSKHIPKCNPQYIANILMKVNTKLGGENGVISGPLPRVSASRTIIFGADVTHPSPMDKTRPSIAAVTASMDANFIRHASAIRAQGHRVEQMDLKDMTMELLKQFYRHTRGKPDRIVFYRDGVSEGQFHMVVNYEVTAIREACQALEVGYLPPITFVIVQKRHNTRLFPDNPKDADRSGNMKAGTVVDTGICHPIENDFYLMSHAGLQGTSRPTHYHVLVNEIGFTADELQTLTYKLCYTFARCTRSVSMVPSAYYSHLVAFRARFFLA
>Ph_palmAGO1A
RPVKLYANHFKVNFNLAGDVFHYDVMMAEAGRSFGNGPPKTLANKIMAALTTELRRQFPDVLLVSDARRNIYAPRRLPFQVQEFTNLQLPDDGRARDFSAVVKEADAIRMQQLDELFAGRLNYTPALQALDVALRHSAAQRFTVVGRNLFSGNGAKSLGEGAELWFGYFQSLRATQSRLVVNLDLAATAFVEEMDVLDFLCETMSMRQMPTLTKYQHSAFSKAIRGVKVNVTHRPGVRRSVNGLSKESAENFFENDDGQRVSIAKYFQQTYNLRLRYPKLPCLHVGAPQKKNYLPMEVCHIMAGQKCRKVTDNQVANMIRFTCTKPDLRKRSIEQKFREAGFDTDPTLRAFGLNVDPRMVETTGRQLPPPTIEYGGTRENPRDGAWNMRGKKFNTPAQFSSWAIISMCRCDLGSIQTFFKAVVAQMGQLGMRCPKTMPPILLKQRREDSVRGMFQAAVQAATQTYNAPPQLVWMINPVLDAHAYGELKIMSDTEMGIVSQCMLSKHIPKCNAQYIANILMKVNTKLGGKNGVISGPLPRVSASRTIIFGADVTHPSPMDKTRPSVAAVTASMDANFIRHASAIRAQGHRVEQIDLKEMTMELLKQFYRQTRGKPDRIVFYRDGVSEGQFHMVVNYEVTAIREACQALEVGYLPPITFVIVQKRHNTRLFPDNPKDADRSGNVKAGTVVDTGICHPVENDFYLMSHAGLQGTSRPTHYHVLVNEIGFTADELQTLTYKLCYTFARCTRSVSMVPSAYYSHLVAFRARFFLA
>Ph_palmAGO1B
RPVKLYANHFKVNFNLAGDVFHYDVMMAEAGRSFGNGPPKTLANKIMAALTTELRRQFPDVLLVSDARRNIYAPRRLPFQVQEFTNLQLPDDGRARDFSAVVKEADAIRMQQLDELFAGRLNYTPALQALDVALRHSAAQRFTVVGRNLFSGKGAKSLGEGAELWFGYFQSLRATQNRLVVNLDLAATAFVEEMDVLDFLCETLSMRQMPTLTKYQQSAFSKAIRGVKVNVTHRPGVRRSVNGLSKESAENFFENDEGQRVSIAKYFQQTYNLRLRYPKLPCLHVGAPQKKNFLPMEVCHIMAGQKCRKVTDNQVANMIRFTCTKPDQRKRSIEQKFREAGFDTDPTLRAFGLNVDPRMVETTGRQLPPPTIEYGGTRENPRDGAWNMRGKKFNTPAQFSSWAIISMCRCDLGSIQTFFKAVIAQMGQLGMRCPKTMPPILLKQRREDSVRGMFQAAVQAATQTFKAPPQLVWMINPVLDAHAYGELKIMSDTEMGIVSQCMLSKHIPKCNAQYIANILMKVNTKLGGKNGVISGPLPRVSASRTIIFGADVTHPSPMDKTRPSIAAVTASMDANFIRHASAIRAQGHRVEQMDLKEMTMELLKQFYRQTRGKPDRIVFYRDGVSEGQFHMVVNYEVTAIREACQALEVGYLPPITFVIVQKRHNTRLFPDNPKDADRSGNVKAGTVVDTGICHPVENDFYLMSHAGLQGTSRPTHYHVLVNEIGFTADELQTLTYKLCYTFARCTRSVSMVPSAYYSHLVAFRARFFLA
>Ph_ramoAGO1
KRVRLYANHFKVNFNLAGDVFHYDVMMAEGGRSFGNGPPKALANKIMAVLMAELRRLFPSFQLVSDARKNVYAPKRLPFQLQEFAGLQLPEDGRARDFSAVVKEADAIRMQQLEELFEGRLNYTPALQALDVALRHSASQRFTVVGRNLFHGHGAKTLGEGAELWFGYFQSLRATQNRLVVNLDLAATAFVEAMDVTDFLCETLALRNMPTLAKYQHSAFSKAIRGVKVNITHRPGVKRSVNGLSRDSADNFFENDEGQRMSIAQYFQQTYNIRLRYPKLPCLHVGAPQKKNYLPMEVCHIMAGQKCRKVTDKQVANMIRFTCTRPDDRKRSIEQKFREAGFNTDPTLKAFGLDVEPRMVETTGRQLPPPTIEYGGARESPRDGAWNMRNKRFNTPAQFKSWAVISMCRCGLGDIQKFFKAVMAQMGQLGMGCPRTPPPVLVKQNRQDSVRHLFGEAVKAATNTFKSPPQIVWMINPMADARAYGELKVMSDTEVGIVSQCMLAKHIPKCNPQYIANILMKVNTKLGGKNGVISGPLPRVSASRTIIFGADVTHPSPMDRTRPSIAAVTASMDPNFIRHASAIRAQGHRVEQTNLKDMVVELMKQFYRSTRGKPDRIVFYRDGVSEGQFQMVLNHEVTAIREACQTLEVDYLPPITFVIVQKRHNTRLFPDNPKDADRSGNVKAGTVVDSGICHPIENDFYLMSHAGLQGTSRPTHYHVLLNEIGFTADELQTLTYKLCYTFARCTRSVSMVPSAYYSHLVAFRARFFLE
>Ph_lateAGO1
KPVRLYANHFKVNFNLAGDVFHYDVMMAEAGRSFGNGPPKALANKIMTALMAELRRLFPAFQLVTDARKNIYAPKRLPFQLQEFAGLQLPEDGRVRDFSAVVKEADAIRMQQLEELFEGRLNYTPALQALDVALRHSASQRFTVVGRNLFLGHGAKTLGEGAELWFGYFQSLRATQNRLVVNLDLAATAFVEAMDVTDFLCETLALRNMPMLAKYQHSAFSKAIRGVKVNITHRPGVKRSVNGLSRESADNFFENEEGQRMSIAQYFQQTYKIRLRYPKLPCLHVGAPQKKNYLPMEVCHIMAGQKCRKVTDKQVANMIRFTCTRPDDRKRSIEQKFREAGFNTDPTLKAFGLDVEPRMVETTGRQLPPPTIEYGRARESPRDGAWNMRNKRFNTPAQFKSWAIISMCRCGLGEIQKFFKAVMTQMGQLGMGCPRAPPPILLKQNRQDSVRHLFGGAVKAATSTFKSPPQIVWMINPMADARAYGELKVMSDTEVGIVSQCMLAKHIPKCNPQYIANILMKVNTKLGGKNGIISGPLPRVSASRTIIFGADVTHPSPMDRTRPSIAAVTASMDPNFIRHTSAIRAQGHRVEQMNLKDMVIELMKQFYRSTRGKPDRIVFYRDGVSEGQFQMVLNHEVTAIREACQTLEVDYLPPITFVIVQKRHNTRLFPDNPKDADRSGNVKAGTVVDSGICHPIENDFYLMSHAGLQGTSRPTHYHVLLNEIGFTADELQTLTYKLCYTFARCTRSVSMVPSAYYSHLVAFRARFFLE
>Ph_crypAGO1B
KAVKLYANHFKVNFNLAGDVFHYDVMMAEAGRSFGNGPPKTLANKILAALMAELRRLFPDFLLVSDARKNIYSPKRLPFQRQEFAGLQLPDDGRARDFSAVVKEADAIRMQQLEELFAGRLNYTPALQALDVALRHSASQRFTVVGRNLFNGHGAKTLGEGAELWFGYFQSLRATQNRLVVNLDLAATAFVEAMDVTDYLCETLTLRNMPTLAKYQHSAFSKAIRGVKVNITHRPGVRRSVNGLSRDSAENFFENDEGQRMSIAQYFQQTYKIRLRYPKLPCLHVGAPQKKNYLPMEVCHIMAGQKCRKATDKQVANMIRFTCTRPSDRKRSIEQKFREAGFSTDPTLRAFGLDVQPRMVETTGRQLPPPTIEYGGARESPRDGAWNMRNKRFNAPAQLKSWAVISMCYCGLGDIQNFFKAVMAQMGQLGMGCPRTAPPILLKQNRQDSVRNLFGAAVKAATSTFKQPPQIVWMINPTTDARAYGELKLMSDTEMGIVSQCMLSKHIPKCNPQYIANILMKVNTKLGGKNGIISGPLPRVSASRTIIFGADVTHPSPMDRTRPSIAAVTASMDANFIRHASAIRAQGHRVEQMNLKDMVVELMKQFYRSTRGKPNQIVFYRDGVSEGQFHMVLNHEVTAIREACQTLEVGYLPPITFVIVQKRHNTRVFPDNPKDADRSGNVKAGTVVDSGICHPIENDFYLMSHAGLQGTSRPTHYHVLLNEIGFTADELQTLTYKLCYTFARCTRSVSMVPSAYYSHLVAFRARFFLV
>Ph_crypAGO1C
----------------------------------------------------------------------------------------------------------------------GRLNYTPALQALDVALRHSASQRFTVVGRNLFNGHGAKTLGEGAELWFGYFQSLRATQNRLVVNLDLAATAFVEAMDVTDYLCETLTLRNMPTLAKYQHSAFSKAIRGVKVNITHRPGVRRSVNGLSRDSAENFFENDEGQRMSIAQYFQQTYKIRLRYPKLPCLHVGAPQKKNYLPMEVCHIMAGQKCRKATDKQVANMIRFTCTRPSDRKRSIEQKFREAGFSTDPTLRAFGLDVQPRMVETTGRQLPPPTIEYGGARESPRDGAWNMRNKRFNAPAQLKSWAVISMCYCGLGDIQNFFKAVMAQMGQLGMGCPRTAPPILLKQNRQDSVRNLFGAAVKAATSTFKQPPQIVWMINPTTDARAYGELKLMSDTEMGIVSQCMLSKHIPKCNPQYIANILMKVNTKLGGKNGIISGPLPRVSASRTIIFGADVTHPSPMDRTRPSIAAVTASMDANFIRHASAIRAQGHRVEQMNLKDMVVELMKQFYRSTRGKPNQIVFYRDGVSEGQFHMVLNHEVTAIREACQTLEVGYLPPITFVIVQKRHNTRVFPDNPKDADRSGNVKAGTVVDSGICHPIENDFYLMSHAGLQGTSRPTHYHVLLNEIGFTADELQTLTYKLCYTFARCTRSVSMVPSAYYSHLVAFRARFFLV
>Ph_infeAGO1
KPVKLHANHFKVNFKLAGDVFHYDVMMSEGGRSFGNGPPKTLANKIMAALLSELKRQFPAFMVVSDARKNIYAPRRLPFQLQEFGSLTLPEDGRAREFSATVKEADAIRMQQLDELFAGRLNYTPALQALDVALRHSASQRFTVVGRNLFNGNGAKSLGEGAELWFGYFQSLRATQNRLVVNLDLAATAFVEEMDVLDFLCESLSLRNLPALNNPQHSAFSKAIRGVKVNITHRPGVRRSVNGLTKTSAQDYFENDEGQRLNIVQYFQKTYNLRLRYPKLPCLHVGAPQKKNYLPMEVCHIMAGQKCRKVTDNQVANMIKFTCTPPDQRKRSIEQKFREAGFNTDPTLRAFGLEVEPRMVETTGRQLPPPTIEYGGARENPRDGAWNMRGKKFNTPAQLKSWAVISMAYCDQTSIEKFFKAVMAQMGQLGMRCPPKLPPILLKQRREDSVRGMFQAGVKAASQTFKTPPQIIWMINPRMDAHAYGELKLMSDSEVGILSQCMLSKHIPKCNPQYIANILMKVNTKLGGRNGVISGQLPLVSASRTIIFGADVTHPSPMDRSRPSIAAVTASMDANFIRHASAIRAQGHRVEQMNLKDMVVELLKQFYRQTRGKPDRIVFYRDGVSEGQFHMVLNFEVTAIREACRTLEVGYLPPITFVIVQKRHNTRLFPDNPKDADRSGNVKAGTVVDTGICHPIENDFYLMSHAGLQGTSRPTHYHVLLNEIGFTADELQTLTYKLCYTFARCTRSVSMVPSAYYSHLVAFRARFFLA
>Ph_infeAGO2
KPVKLHANHFKVNFKLAGDVFHYDVMMSEGGRSFGNGPPKTLANKIMAALLSELKRQFPAFMVVSDARKNIYAPRRLPFQLQEFGSLTLPEDGRAREFSATVKEADAIRMQQLDELFAGRLNYTPALQALDVALRHSASQRFTVVGRNLFNGNGAKSLGEGAELWFGYFQSLRATQNRLVVNLDLAATAFVEEMDVLDFLCESLSLRNLPALNNPQHSAFSKAIRGVKVNITHRPGVRRSVNGLTKTSAQDYFENDEGQRLNIVQYFQKTYNLRLRYPKLPCLHVGAPQKKNYLPMEVCHIMAGQKCRKVTDNQVANMIKFTCTPPDQRKRSIEQKFREAGFNTDPTLRAFGLEVEPRMVETTGRQLPPPTIEYGGARENPRDGAWNMRGKKFNTPAQLKSWAVISMAYCDQTSIEKFFKAVMAQMGQLGMRCPPKLPPILLKQRREDSVRGMFQAGVKAASQTFKTPPQIIWMINVRMDAHAYGELKLMSDSEVGILSQCMLSKHIPKCNPQYIANILMKVNTKLGGRNGVISGQLPLVSASRTIIFGADVTHPSPMDRSRPSIAAVTASMDANFIRHASAIRAQGHRVEQMNLKDMVVELLKQFYRQTRGKPDRIVFYRDGVSEGQFHMVLNFEVTAIREACRTLEVGYLPPITFVIVQKRHNTRLFPDNPKDADRSGNVKAGTVVDTGICHPIENDFYLMSHAGLQGTSRPTHYHVLLNEIGFTADELQTLTYKLCYTFARCTRSVSMVPSAYYSHLVAFRARFFLA
>Ph_paraAGO1
RAVKLHANHFKVNFKLAGDVFHYDVMMAESGRSFGNGPPKTLANKIMAALLAELKRQFPDFMVVSDARKNIYAPRRLPFQLQEFSGLTLPDDGRAREFSATVREADAIRMQQLDELFAGRLNYTPALQALDVALRHSASQRFTVVGRNLFSGNGAKSLGEGAELWFGYFQSLRATQNRLVVNLDLAATAFVKEMDVLDFLCESLSLRNLPPLAKHQHSAFSKAIRGVKVNITHRPGVRRSVNGLTKNSAEQFFENDEGQRMSIVQYFQKTYNLRLRHPKLPCLHVGAPQNKNYLPMEVCHIMAGQKCRKVTDNQVANMIKFTCTPPDQRKRSIEQKFREAGFSTDPTLRAFGLDVEPRMVETTGRQLPPPTIEYGRATETPRDGAWNMRGKKFNTPAQLKSWAVISMAYCNQASIEKFFKAVMTQMGQLGMRCPPKLPPILLKQRREDSVRGMFQAAVNAANQTFKTPAQIIWMINPRMDAHAYGELKLMSDSEMGILSQCMLSKHIQKCNPQYIANILMKVNTKLGGKNGIISGPLPRVSASRTIIFGADVTHPSPMDKSRPSVAAVTASMDPNFIRHASAIRAQGHRVEQMNLKDMVVELMKQFYRQTRGKPDRIVFYRDGVSEGQFHMVLNYEVTAIREACQTLEVGYLPPITFVIVQKRHNTRLFPDTPRDADRSGNVKAGTVVDTAICHPIENDFYLMSHAGLQGTSRPTHYHVLLNEIGFTADELQTLTYKLCYTFARCTRSVSMVPSAYYSHLVAFRARFFLA
>Ph_agatAGO1
KPVKIYANHFKVNFNLAGDVYHYDVMMAETGGAFGNGPPKTLANKIMAALMAELKRQFPDFMLVSDARKNIYSPRRLPFQLQEFTELKLPDDGRAREFSAVVKEADAIRMQQLEELFAGRLNYTPALQALDVALRHSASQRFTVVGRNLFSSSGAKTLGEGAELWSGYFQSLRATQSKLVVNLDLAATAFVEAMDVVDYLCESLSMRQMPTLNKYQHSAFSKAIRGVKVNITHRPGVQRSVNGLSRDTAENFFENDEGQRVSIVQYFQRTYNLRLRYPKLPCLHVGAPQKKNYLPIEVCHIMAGQKCRKVTDKQVANMIRFTCTPPDQRKRSIEQKFREAGFNTDPTLRAFGLEVEPRMVETTGRQLPSPAMEYGG-RENPRDGAWNMRNKKFNTPAQFTSWAIISMCRCSQGDIDKFFKAVRAQMGQLGMRCPTTSPPILLKQRREDTVRGMFQAAVKAANQTFKTPPQLVWMINPVMDAHTYGELKLMSDTEMGIVSQCMLSKHIQKCNPQYIANILMKVNTKLGGKNGVISGPLPQVSA-RTIIFGADVTHPSPMDKTRPSIAAVTASMDAHFIRHASAIRAQGHRVEQMNLKEMVVELMKQFYRQTHGKPDRIVFYRDGVSEGQFHMVVNHEVTAIREACQILEVGYMPPITFVIVQKRHNTRLFPGNPKDADRSGNVKAGTVVETGICHPIENDFYLMSHAGLQGTSRPTHYHVLVNEIGFTADELQTLTYKLCYTFARCTRSVSMVPSAYYSHLVAFRARFFLV
>Ph_capsAGO1
KPVTIYANHFKVKFNLAGDVYHYDVMMAEAGRSFGNGPPKTLANKIMAALMAEMDRQFPGFFLVTDKRKNIYSPRRLPFQIQEFDGLQLPDDGRARNFSATVKEADAIRMQQLEELFAGRLNYTPALQALDVALRHSASQRFTVVGRNLFNGNGAKSLGEGAELWFGYFQSLRATQNRLVVNLDLAATAFVEEMDVVDYLCESLQLRNMPTLAKYQQSAFSKAIRGVKVNITHRPGVRRSVNGLSKMSAEEFFENDEGQRMSIVQYFQKTYNVRLRYPKLPCLHVGAPQKKNYLPMEVCHIMGGQKCRKGTDNQVANMIKFTCTKPDVRKRSIEQKFREAGFSTDPTLRAFGLEVDPKMVETTGRQLPPPTMEYGG-RENPRDGAWNMRNKRFHSPSRLTSWAVISMAFCNMQSMETFFKAVMTQMGQLGMACPPKLPPILQKQRRDDSVRGMFQNAVKAATQAFRSPPQIIWMINPRMDAHAYGELKLMSDSEMGILSQCMLAKHISKCNAQYIANILMKVNTKLGGKNGIISGPLPRVSVSRTIIFGADVTHPSPMDKTRPSVAAVTASMDANFIRHASAIRAQGHRVEQMNLKDMVVELMKQFYRQTQGKPDRIVFYRDGVSEGQFHMVLNYEVTAIREACQSLEKDYLPPITFVIVQKRHNTRLFPANANDADRSGNVKAGTVVETGICHPIENDFYLMSHAGLQGTSRPTHYHVLLNEIGFTADELQTLTYKLCYTFARCTRSVSMVPSAYYSHLVAFRARFFLA
>Ph_cinnAGO1
RAVTLLANHFKVDLKLAGDVFHYDVSMAEAGRNFGNGPPKALAGKIMAALMRELARQFPDAALVSDARKNIYAPRRLPFRQQEFGALALPDDGRAREFSAVVKEADAVRMQQLDELFAGRLNYTPALQALDVALRHSASQRLTAVGRNLFSGVGAKTLGEGAELWFGYYQSLRPTQSRLVVNLDLAATAFVEARSVTDYLCETLALRQLPALNRFQHKDFSKAVRGVKVNVTHRPGVRRSVNGLSKDSAENFFQTDDGQRVSVVQYFQRTYNLRLRYPKLPCLHVGAPQKKNYLPMEVCHIMAGQKCRKATDKQVANMIRFTCTPPDQRKRAIEYKFQEAGFNSDPTLRAFGLEVDPNMVETTGRQLPPPTIEYGGARENPRDGAWNMRGKKFHAPAQFKSWAVISMCRCSLGSIQAFFKAVMGQMGQLGMRCPRTPPPILLKQNRQDSVRNMFQTAVSEATRTFNAKPDIVWMINPVTDARAYGELKLMSDTEMGIVSQCMLSKHIPKCNPQYIANILMKVNTKLGGKNGVISGSLPQVSASRTIIFGADVTHPSPMDKTRPSIAAVTASMDANFIRHASTIRAQGHRVEQMNLKEMTMELMKQFYRSTHGKPDRIVFYRDGVSEGQFHMVLNYEVTAIREACQALEKGYMPPITFVIVQKRHNTRLFPSNRNEADRSGNVKAGTVVDSGICHPIENDFYLMSHAGLQGTSRPTHYHVLLDEIGFTADELQTLTYKLCYTFARCTRSVSMVPSAYYSHLVAFRARHFLV
>Ph_piniAGO1B
----------------------------------------------------------------------TFAPSRLPFQQQEFDGLQLPDDERARAFSAVVKEADAIRMQQLEELFAGRLNYTPALQALDVALRHSASQRFTVVGRNLFGPNGAKSLGERAELWFGYFQSIRATQNRLVVNLDLAATAFVEAMSVLEYLGETLSLRDTPTLAKYQLSAFSKAVRGVKVNITHRPGVRRSVNGLSKESAERFFENDDGERMSIVQYFQRTYNIRLRYPKLPCLHVGAPQKKNYLPMEVCHILAGQKCRKVTDKQVANMIKFTCTPPDQRKRAIEQKFREAGFSSDPTLRAFGLEVDPNMVETTGRQLPP-------------------------------------------------------------------------------TVRGLFQDAVKAATQTFKTPPQVVWMINPTTDAHAYGELKLMSDTEVGIVSQCMLAKHIPKCSPQYIANILMKVNTKLGGKNGVISGPCRE---------------------------SVTASMDANFIRHASAIRAQGHRVEQMNLNDMVMELLKQFYRKTQGKPDRIVFYRDGVSEGQFHMVLNYEVTA-----------------------------------------------------------------------------------------------------------------------------------
>Hy_arabAGO1
--------------------------MAEGGRSFGNGPPKALANQILRTLLTDLQRQYPDVVVVSDARKNLYTPTRLPFATRTFDALQLPADGRARGFSATVKEASAIRLQQLDELFAGRLNYTPALQALDVAMRHSAAQRFTVVGRNLFNAAGATSLGEGAELWFGYFQSLRATQNRLVVNLDLAATAFVEAMDVTSYLSETLALRQLPTLAKHQHAAFSKAMRGVKVNVTHRPGVKRSVNGLSRDAADRFFETDDGQRLSIAQYFEQTYKLRLRYPKLPCLHVGAPQKKNYLPMEVCHILAGQKCRKPTDKQVANMIRFTCTPPDKRKRAIEQKLREAGFSTDPTLRAFGLQVDPNMVETTGRQLPPPTIEYGGARENPRDGAWNMRGKRFNTPAQCKSWAVISMCRCSLGDIQKFFKAVIAQMGQLGMRCPPALPPILLKQRREDAVRGMFQAAVKAATQTFKTAPQIVWMINPVSDAHAYGELKLMSDTEVGIVSQCMLSKHIPKCSPQYIANILMKVNTKLGGLNGVISGSLPRVSASRTIIFGADVTHPSPMDKTRPSIAAVTASMDTHFVRHASAIRAQGHRVEQENLKDMTMELLKQFYRQTHGKPDRIVFYRDGVSEGQFHMVLNHEVTAIREACQALEVGYMPPITFVIVQKRHNTRLFPGDSKDADRSGNVKAGTVVETGICHPIENDFYLMSHAGLQGTSRPTHYHVLLNEIGFTADELQTLTYKLCYTFARCTRSVSMVPSAYYSHLVAFRARFFLV
>Ph_crypAGO1A
KAVKLYANHFKVNFNLAGDVFHYDVMMAEAGRSFGNGPPKTLANKILAALMAELRRLFPDFLLVSDARKNIYSPKRLPFQRQEFAGLQLPDDGRARDFSAVVKEADAIRMQQLEELFAGRLNYTPALQALDVALRHSASQRFTVVGRNLFNGHGAKTLGEGAELWFGYFQSLRATQNRLVVNLDLAATAFVEAMDVTDYLCETLTLRNMPTLAKYQHSAFSKAIRGVKVNITHRPGVRRSVNGLSRDSAEN----------------------------------------------------------------------------DRKRSIEQKFREAGFSTDPTLRAFGLDVQPRMVETTGRQLPPPTIEYGGARESPRDGAWNMRNKRFNAPAQLKSWAVISMCYCGLGDIQNFFKAVMAQMGQLGMGCPRTAPPILLKQNRQDSVRNLFGAAVKAATSTFKQPPQIVWMINPTTDARAYGELKLMSDTE---------------------------------------------VSASRTIIFGADVTHPSPMDRTRPSIAAVTASMDANFIRHASAIRAQGHRVEQMNLKDMVVELMKQFYRSTRGKPDQIVFYRDGVSEGQFHMVLNHEVTAIREACQTLEVGYLPPITFVIVQKRHNTR-FPDNPKDADRSGNVKAGTVVDSGICHPIENDFYLMSHAGLQGTSRPTHYHVLLNEIGFTADELQTLTYKLCYTFARCTRSVSMVPSAYYSHLVAFRARFFLV
>Ph_pisiAGO7
QVVKVLANHFKVNFNLAGDVFHYDVGMSEAGRSFGNGPPKVLAGKIMASLLAELSRQFPDVALVSDARKNIYAPRRLPFQQQQFGGLALPDDDRAREFSAVVKEADAVRMEQLEQLFNGRLDYTPALQALDVAMRHSASQRFTVVGRNLLSSADAEALDEGAELWFGYHQSLRPTQNRLVVNLDLAATAFVKDMSVMDYLGETQSLRDTPALNQRQRSDVSKAIRGVKVNVTHRPGVKRSVNGLSKDSAENFFEDDEGQRMSIAQYFQRAYNIHLSYPELPCLHVGAPQKKNYLPLEVCHIQAGQKCRKITD----------------------------------------------------RQLPPPTIEYAGARMTPADGVWNMRNKKFNAPTQLQSWAVFSMCRCALANIQSFFSVVMDQMNKLGMSCPRTPPPVLLKRSRRDTVRSMFQEAVTAAMETFNSKPEIVWMINPTSDTRAYKELKLMSDTELGIVSQCMLAKHIPKCNLQYIANILMKVNTKLGGKNGVISDPLPQVSSSRTIIFGADVTHPSPMDKTRPSIAAVTASMDDNFIRHASAIRAQGHRVEQMNLKEMTMELMKRFYRSTGGKPDRIVFYRDGVSEGQFLMVLNHEVTAIREACRALEKDYTPSITFIVVQKRHSTRLFPSDSNEADRSGNVKAGTVVDSGICHPIENDFYLVSHAGLQGTSRPTHYHVLLDEIGFSADDLQRLTYQLCYTFARCTRSVSMVPSAYYSHLVAFRARLFLV
>Ph_vexaAGO1
KRVKVHANHFKVNLKLDGDVYHYDVAMGEGGSMFPNGPPKTLAQKIIGALMAELRVQFPQHSLVSDGRKNIYSPALLPFQEQSFGGLKLPEDGRPREFMAVVRAADAVRIDQLDELFAGRLNYTPALQALDVAMRYTASSRFTVVGRNLFSSAGAKAIGEGADVWFGYFQSLRATQNRLVVNLDLAATAFVQAMDVLDYVYETVNLRDMPRFNKFQHSAFSKAIRGVKVEITHRPGVRRSVNGLSPNGADQFFTDENDNRISVAQYFAKQYNLRLRYPGLPCLHVGAQQKKNYMPMEVCRIVEGQKCRKVTDTQVANMIRFTCTPPDQRKRAIEQKFREAGFNTDPTLRAFGLEVDPKMIVAEGRQLPPPSIEYGNVRENPRDGQWNMRNKRFQSPARLTSWAVISCCRCSKADIQKFFKAIINQMGQLGMSCPNVLPPIVEKRMPRDPVKNLFIQAMDAARSTFKAPPQLIWMVNPVLDQHAYGELKRMSDTEVGVVSQCMLAKHIPKCNPQYIANILMKVNTKLGGKNAVISGPLPKVSASRTIIFGADVTHPSPMDKTRPSIAAVVASMDAHFIRHSAVIRAQGHRVEQTNLKDMVIDLMKQFYRSTNGKPDRIVFYRDGVSEGQFHMVKNHEVSAIREACAALEKGYNPPITFIIVQKRHNTRLFPDSSNEADRSGNVRAGTVVDNGICHPIENDFYLMSHAGLQGTSRPTHYHVVLDEIGFTADELQTLTYRLCYTFARCTRSVSIVPSAYYSHLVAFRARYFSF
>Py_ultiAGO1
TPVKILANHFQVNFSPREDVYHYDVAFAENGKIFSNGPPKTLAAKIMQALVTQMKLEFPSTCIVSDGRKNLYSSSRLQFEERAFTGLKLADEDRPKEYSAVVKEADAIRMEQLNELFAGRLNYTPALQALDIAMRHTASTKFTVVGRNLFSSAGKKDIGEGADVWFGYFQSLRATQSKLVLNLDLAATAFVKDMSAIDYVYETLRLHDLPAMNKYQHSALNKAISGVKVEITHRPGVRRAVNKLSTNGADQFFQDDNGTRVSIQSYFASTYNLRLRYPRLPCLHVGARDKGIYLPIEVCNIMAGQKARKATDTQVANMIRFTCTNPQDRKRSIEAKFREAGFDRDPTLQAFGLHVNPKMIETQGRLLAPPNMAYKNGTIRPDAGVWNMKGKSFYQAAKLNSWAVISCCRNPMADMEQFFRAVISQMGQLGMDPPKALPPIIVKP-RNESVRRAFDEAIRAATSTFRVKPQIVWMINPMTDAIAYGDLKRASDSELGIVSQCMLAKHIQKCNPQYIANILQKVNTKLGGKNAVIAENLPKLGR-NTIVFGADVTHPSPMDRTRPSVAAVVASMDQNFIKHAASIRAQGHRVEQTNLKDMVVDLMKRYYRETRSKPERIVFYRDGVSEGQFHMVLNHEVTAIRDACATLEKGYMPPITFIIVQKRHNTRLFPSDPKTGDRSGNVKAGTVVDSAICHPVENDFYLMSHAGLQGTSRPTHYYVLLDEIGFSADEIQGITYKLCYTFARCTRSVSMVPSAYYSHLVAFRARFFQL
>Py_irreAGO1
TAVKILANHFQVNFNPRGDVYHYDVSFGENGRQFPNGPPKMLATKIMQALLTQLKRDFPTAVIVSDSRKNLYSPSRLSFQEQSFTGLKLANEDRPKEYSATVKAADAIRMEQLNELFAGRLNYTPALQALDIAMRHTASARFTVVGRNLFSSAGKKDIGEGADLWFGYFQSLRATQSKLVVNLDLAATAFVKEMSVVAYACETLGLHDLPSFYKYQQSALSKAIAGVKVETTHRPNVRRQVNKLSSRGADQTFKDDEGRTISVASYFASAYGVRLRYPQLPCLHVGALKGSNYLPLEVCKIVAGQKCRKATDHQVANMIRFTCTPPQDRKRSIEAKLREAGFDRDPTLQAFGLNVNPRMVEVQARLLPPPTMAYKSGTIRPDTGFWNMKGKSFFQASKLTSWAVISCCRNPMADMEKFFRAVINQMGQLGMDPPKNLPPIIVKS-RNQSVRNAFDEAVRAAASTFRAKPQIIWMINPTTDASAYGDLKRASDTEVGIVSQCMLAKHIQKCNPQYIANILLKVNTKLGGKNTVIAENLPKFGK-GTIVFGADVTHPSPFDRTRPSVAAVVASMDHNFIKHAASIQAQGHRVEQTNLREMTVDLMKRYYRETRSKPERIVFYRDGVSEGQFHMVLNHEVTAIREACATLEKGYQPPITFIIVQKRHNTRLFPSDARDGDRSGNVKAGTVVDSVICHPVENDFYLMSHAGLQGTSRPTHYHVVLDEIGYTADEIQTITYKLCYTFARCTRSVSLVPAAYYSHLLAFRARFFQL
>Py_iwayAGO1
TPVKILANHFQVNFNPRGDVYHYDVAFGEDGRQFSSGPPKTLTTKIMAALLLQIKREFPGVVVVTDNRKNIYSPSRLPFEIQSFTGLKLADEDRPKEYSGTVKAADAIRMDQLTELFAGRLNYTPALQALDIAMRHAASTRFTAVGRNLFSPAGKKPIGEGADLWFGYFQSIRATQSKLVVNLDLAATAFVQDMSVTDYVYETLELSNLPAFNKFQHSTFSKAISGVKVEITHRPGVRRQVNKLSREGAAQFFEDDDGKRMSVAAYFAATYNVHLRYPHLPCLHVGALKGRNYLPLEVCKIVAGQKCRKATDKQVANMIRFTCTPPQDRKRAIETKFREAGFDRDPTLQAFGLNVNPRMLEMQARLLPPPNLAYKNGTIRPDTGMWNMRGKSFFDAKKLTSWAVISCCRNPMSDMEKFFRAVIDQMGQLGMDVPKSLPPIIVKP-RNQTVRNAFDEAVRAATTAFRAKPQIIWMINPMMDASAYGDLKRASDTEVGIVSQCMLAKHIQKCNPQYIANILMKVNTKLGGKNTVIAENLPKFGK-GTIVFGADVTHPSPFDRTRPSVAAVVASMDHNFIKHAASIRAQGHRVEQSNLKEMTVDLMKRYYRETRSKPDRVVFYRDGVSEGQFHMVLNYEVTAIREACAMLEKDYQPPITFIIVQKRHNTRLFPSDSRDADRSGNVKAGTVVDSVICHPVENDFYLMSHAGLQGTSRPTHYHVLLDEIGYTADEIQTITYKLCYTFARCTRSVSLVPAAYYSHLLAFRARFFQM
>Ph_meloAGO7
-------------------------------------------------------------------------------------------------------------------------------------------------------------------------------------------------MSVEDYLCETLSLRQTPTLTTRQRSDFSRAIRGVKVNATHRAGLPRQ-RFLSRDSAKNFFEDDDGQRVSIVQYFQRTYYISRRYPELPCLHVGAPQKKDYLPIHA-------SCRV------------------QRRRARD--------------------------------------------------------------------------------------------------------------------------------------PEIVWMINPTSDARAHKELKLMSDTELGM--------HIPKCNLQYIANILMKVNTKLGGKNAIR-------STAAGISFSV-IAHCG-LRWTR-------RDRDNNFIRCASAIRAQGHRVEHTNLKEMTMELMKRFYRSTHSTPERIVFYRDEVSEGQFDMVLTHEVTAIREVCRALEKDYTPRITFIVVQKRHNTRL-----NEADRSGNVKAGTVVDARICHPIENDFYLPGTAGHQ-----------------SPDD-----------------SVSMVPSAYYS---PFRARF---
>Al_candAGO1
KQISIHANHFKVRTNLGISLYHYDVSMALQGENFKNGLSKTVTSLLMTSLMARVKKDFPALIVVNDGRKNIYAVSKFPFTEQKFEELQLPDQTKPKLYHCLIKEASAVNVNQLELLFQGKLNYTPALQALDIAMRHTASSRFVSVGRSLYAPNGAKDIGEGAEVWFGHFQSLRATQNHLVVNLDLAATAFVKQMSVLEFLVETLRERTLPKLNKAQASVFTKAVKGVKVSVTHRGDMKRTVNGLSRTSAQEFFEDDSGAKVSVATYFSKNYG-TLRYPGLPCLHVGAMNKKNYLPMEVCHILAGQKTRKVTDKQVANMIRFTCTKPDDRKRQIEQKLRDAGFDRDPVLKALGMSVDPKMVTTKARVLPEPEMSYRGTER-PRDGAWNMKNKSFFQSAHLASWAVISMCRCGPDQIKKFFTQVMKQMKEFGMQVPQQFPPIILKQQRYAKVRDMFKEALSKAQLTFKAPAQIIWLINPVADADVYGELKRSSDIESGIPSQCMLAKHIDKASPQYIANILLKVNAKLGGKNSVVREPLPKVSEAPTIIFGADVTHPGVTETSRPSIAAVVASMDRHCIKHAATIRVQGHRVEQINLQEMVKELLVLFYKEARVKPSRILFYRDGVSEGQFQMVLKHEVTAIRAACASLEKGYMPAVTFVVVQKRHNTRLFAADQRDADRSGNVKAGTVVDTDICHPLEHDFYLMSHGGLQGTSKPAHYHVLLDEIGFTADELQLLTYRLCYTFARCTRSVSVVPSAYYSHLMAFRARFFTP
>Al_laibAGO1
KQISIFANHFKVNANLGMSLYHYDVSMALQGENFKNGLSKTVTSLLMISLMARVMKDFPALIVVNDGRKNIYAVSKFPFQEKRFEELQLPDQTKPKLYHCFIKEASAVNINQLQLLFQGKLNYMPALQALDIAMRHTASSRFVSVGRSLYARNGAKDLGEGAEVWFGHFQSLRATQNHLVLNLDLAATAFVKEMSVLEFLVETLRERTLPKLSKAQASIFSKSVKGVKVSVTHRGDLKRTVNGLSKTSAQDFFDDDSGAKVSVAAYFAKNYG-CLRYPGLPCLHVGAMQKKNYLPMEVCHILAGQKTRKVTDKQVANMIRFTCTKPDDRKLRIEQKLRDAGFERDPVLKAFGLAVNSKMVSAKARILPEPEISYRGTER-PRDGAWNMKNKSFFQSAHLASWAVISMCRCGPDQIKKFFTQVVKQMKEFGMQIPQQLPPIIMKQQRFAKVRDLFKEALTNAQTTFKAPAQIIWLINPVADADVYGELKRTSDIESGIPSQCMLWKHIDKASPQYIANILLKVNTKLGGKNAVVREPLPKVSEAPTIIFGADVTHPGLTERSRPSIAAVVASMDRHCIKHAATLRVQGHRVEQINLQEMAKELLVLFYKEARVKPTRILFYRDGVSEGQFQMVLNHEISAIRAACASLEKDYMPAITFVVVQKRHNTRLFAADQKDTDRSGNVKAGTVVDTEICHPLEHDFFLMSHGGIQGTSRPTHYHVLLDEIGFTADELQVLTYRLCYTFARCTRSVSMVPSAYYSHLMAFRARFFTP
>Al_candAGO3
KQISIHANHYKVTADFGVSLYHYDLSMALQDEKFTNGLSKSVTSHLMSSLWARLKVDMSTPVVVTDCRKNIYTVLKLPFTEKEFDNLQLPDQAKPKLYHCLVKEASAVSANQPEMFFQGKLNYTPALQALDIAMRHTSSSRLVSVGRSLYSHNGAKDIGED-------------------LNLDLAATAFVKEMSVLDFLIETLRDRTLPRLNKVQTLAFSKAVKGLKVYVTHRGDMKRTVNGLSKASAGDFFDDDSGSELSVAAYFAKNYK-SLRHPELPCLHVGAMNKKNYLPLEVCHIIAGRKTRKITDRQVENMIRFTCTKPDDRKHRIEQKVRDVGFGRDPVLKAWGLTVNPTMVTAQARILPEPEMAYRGTER-PRDGAWKMKNKSFSESAHLTSWAVISMCRCSPDQIKKFLIQVVKQMRQLGMQVPQQIPPIILQQQRFSTVRELFPDALHKAQTTFRAPAEIIWLINSTADA----------------------------------------VNTKLGGKNAVISDPIPKVSEVPTIIFGADVTHPGVSERSRPSIAAVIASMDRHCIKHAATLRVQGHRVEQMNLQEMAKELLMIFYKESRVKPNQLLFYRDGVSEGQFSMVLNHEVTAIRAACASLEKDYMPAITFLVVQKRHNTRLFASDQKDTDRSGNVKAGTVVDTEICHPFEHDFYLMSHGCIQGTSRPTHYHVLLDEIGFSADELQVLTYRLCYTFARCTRSVSMVPAPYYSHLLAFRARIFTP
>Py_aphaAGO1
TRLMLFANHFKVALRQDSDVYHYDISMMDNGRKFGNGPPKALAEKITRVL-------YKDAVVVTDGRKNLYAARRLPFDEELFNGLDIGETRLPVLFQAVVKAADAVRMQQLTALFDGHLNYTPALQALDIVLRHTASQRMTLIGRNLYSPRGARDIGEGAECWSGYFQSLRPTQNRLVINLDLSATAFVKAMPVLDYVAEAIRDGSVPMLSPSQHSMASKALRGVKVEITHRPGVKRQANGLSSRGADQFFEDENGRRVSVADYFARNYT-RLRYPKLPCLHVGAAKNGVHLPLEVCRTVAGQKCRKTTDKQTAEMIKVARTDPAQRKSRIEQIVRDANFAQDPILRAYGLSVDPTMVTVEGRQLLAPVLMYNGKTVRARDGAWRMDQARYFSGGRLESFAVLVHDRLRDESVKKFFDRVLSQGREAGLTNLSRPPPLI-KVRRGRAMRDVFQEGVAAAQRTFGKPAQLIWSVHAFQDAKLYGDLKRVSDTEFGIPSQCMLSKHIDKANPQTIGNLLLKVNTKLQGVNVKIADAPPDKIRSSTIIFGADVTHPSPGDQTRPSIAAVVGSINHDFTSYAAAIRAQGHRVEQVNLKDMVMQLLKSYYKSTRTKPANILFYRDGVSEGQFPMVMNYEVTAIREACAAIEPGYQPAITFIIVQKRHHTRFFVTNSKDADRSGNVKPGVVVDNGVCHPTEYDFYLMSHAGIQGTSRATHYHVLLDEIRLTPDELQGLTYRLCYTYARCTRSVSMVPAAYYAHLLAFRARFFTP
>Py_arrhAGO1
----------NVKLQLQGDVYHYDVAMGESGRKFGNGPPKALAEKIMR------------ALVAT----NLYASRQLPFEEQVFDGLDIGERRTPVLFRATVKAAEAVRMHQLSAMCEGRLNYTPALQALDIVMRHTASQRLTAVGRNLYSPQGARYLGEGAECWMGYFQSVRPTQNQLVINLDLAATAFVKAMPVLQYVAEAIRDGRVPALTPSQASMASKALRGVKVETTHRPGMKRAVNGLSPRSAADMFEDDKGRRLSVAQYFAENYR-RLNYPNLPCVHVGAQNKKTYFPIEVCHILAGQKCRKVTDRQTAEMIKVAKTNPGERKSRIEQIIREANFAQDPILKAFGLTVDPKMVTTQGRLLAPPSLMYGGKRVQANAGMWNADQAPFLETKKLESFGIIILDRANEGSVRRFFEKVLVKMRNLRMSSMNKLPKFV-WSRRGKPMRESFSEAINAARTCYGKDVQLVWTVNAFQDAHTYGEIKRISDTEYGFPSQCMLSKHIDMAKDQYIDNILLKVHVKLEGRNWKLASPPPPKIAQRTIMFGADVTHPSPGDTTRPSIAALVGSTNHDFTAHASVIRAQGHRVEQVNLKEMVMVLLKAYYKSVKAPPSNIIFYRDGVSEGQFQMVLNHEVTAIREACEAIQAGYRPAITFIVVQKRHHTRFFAMNAKDTDKSGNVKAGTVVDSGVCHPTEYDFYLMSHAGLQGTSRPTHYHVLLDEIQLPPDELQTFTYHLCYTYARCTRSVSMVPSAYYSHLLAYRARFFLP
>Ap_astaAGO1a
KPVTLWANHFAVKINPAGDVFHYDASIAAEGKTPTQTPPKDLCTAVLQALINLFKTEYPTIAVVADGRRNLYAAKLLPFDAMIFKVPRMKE-GRTEIFDVHVVAANAVRTEQLHELFAGRLNYTPAIQALDIAMRYSASTRFTTVGRNFFTNSGAVTLGEGAELWFGYHQSLRPTQTQLTLNIDMAATAFVESMAALDYLVETCRLQDVPTLTKPQASNAAKAFRGIKVTVTHRGTVERSVNGL-KKTAKETIELDGGRRVTVADYFATNYR-PLRYPNLPLLHVGSPKGSIFMPMEVCHVLGGYKCRKATDNQVANMITYTATPPEERRQKIVARVQEAHFTVDNTLAAFGASVDPTMLTVEARELAAPSMLYHNKTEQPRDGAWNMRNLALFQGMAFKSYALMSLCRTTDADVFDFFNALVTHMKGLGMTPPGAKPPLVTRGGRGDPIERMFQEAVDKATRVFGQRPQIVFCVAPVQDALNYGDLKRASDTVFGIPSQMMLAKHLAKQNPMYMSNLLLKVNTKLGGRNAVCKDPLPKISSDATIIFGADVTHPGPMDKSRPSVAAVVASTDKWGVRHAATMRRQGHRVEQEDLESMAVDMLKAFYRETKRKPAQLLFFRDGVSEGQFQMVLNFEVSALHAACAKLEAGYRPKITFVVVGKRHHTRLFATSAAHADRSGNVRAGTVVDTGICHPTETDFYLMSHAGLQGTSRPAHYHVLLDEIGFTADELQNLAFRLTHTYARCTRSVSIVPSVYYAHLLAFRARFFLV
>Ap_invaAGO1b
QPVTLWANHFAVTLNRNGDIYHYDASIVAEGKAPSKTPPKVLCSAVLQTLINMLKIEYPTIAVVADGRRNLYASQLLPFDAKVFKVPREKE-GRTEIFDVHVVSTDAVRTEQLHHLFAGRLNYTPAIQALDIAMRYSASTRLTSVGRNFFTNTGAVTLGEGAELWFGYHQSLRPTQSQLTLNIDMAATAFVESMPALDYLLETCRLSDIPTMGKAQISSASKAFRGIKVAVTHRGTVERAVNGL-KKSANETIDLDNGRRVTVAQYFATNYR-PLRYPNLPLLHVGSPKGNNYMPMEVCNVLGGYKCRKATDNQVANMITYTATAPEERRQKIITKMQEAHFAVDNNLASFGTSVNPTMMTVEGRQLPPPAMLYNNKTETPRDGAWNMRNLALFQSMAFKSYAIMSLCRVTDGDVYDFFNALVTHMKGLGMSPPSAKPPLVNSRGRQDSIERMFNEAITNATQVYGVRPDIVFCVAPMQNAQNYTDLKRASDTVFGIPSQMMLAKHLPKQNPMYMSNLLLKVNTKLGGRNTVCKDPLPKISTEATIIFGADVTHPGAMDKSRPSVAAVVASTDRWGVRHAAAMRRQGHRVEQEDLESMAVELLKAFYSETKRKPSQILFFRDGVSEGQFQMVLNYEITALHAACAKLEPGYRPKITFVVVGKRHHTRFFPTSAQHADRSGNVKAGTVIDTGVCHPTENDFYLMSHAGLQGTSRPAHYHVLLDEIGFTPDELHNLAFRLTHTYARCTRSVSIVPSVYYAHLLAFRARCFIV
>Ap_euteAGO1
--------------------------------------------------------------------------------QKVFQVSRAKEGGRTEIFDAHVTAATAVRLDQLSQLFAGRLNYTPAIQALDVAMRYSASTRFTTVGRNFFNNMGAVSLGEGAELWFGYHQSLRPTQSQLTLNVDMAATAFVEAMPALDYLVETCRLQDVPALSKFQIADANKAFRGVKIKVTHRGTVDRAVNGL-KKSARETMEVEGGGRIPIERYFAEHYR-PLRYPNLPLLHSARPRIRIKLPWKYANIDGGLKSRKV------------------RRQKIEARVRDAHFSGDQCLQAFGLTVDPKMLAVEGRVLRAPDVLYRGKTEQPRDGAWNMRNLELFQGMALDSYAILSLCRTSNDDILDFFHALVDHMKSLGMKPPSGRPPLLVRQGRQQPIESMFGEAVNQAKTAFGVNPQVIFCVSPVADAANYGELKIASDVTFGIPSQMMLAKHLLKKNPMYMSNLLLKVNTKLGGRNAVCKDPLPKIGSQATIIFGADVTHPGAMDKSRPSVAAVVASMDRWGVRHAASIRKQGHRVEQEDLESMAAEMLKAFFIETKRKPSQILFYRDGVSEGQYQMVLNFEVSALRQACAKLEPGYAPKISFVIVGKRHHTRLFPTSASTADRSGNVKAGTVVDTGICHPTEHDFYLMSHAGLQGTSRPAHYHVLLDEIGFTADELQALSFNLTHTYARCTRSVSLVPSVYYAHLLAFRARYFLL
>Ap_astaAGO1b
RAIVVWANHFQVDLNVNGDIFHYDVVFCKKGDTLQA-PKKELCVRVLKALIKELKSELPAITVVSDARRNIYASAALPFNNRMIVVKEVFDSGKSKEWDVYVKAADAIPMHQVEEFFAGRLNFTPAIMALDIALRATANNKFVSAGRNFYTPSNKVALGEGADLWFGYHQSLRPTQTRLTLNIDIAAATFIKKMDLIEYVTTTAARFDDPQM-----RAASRAVKGVLVRVTHRGNLNQEINGLTTTPANAFFTTTDGTQHSVAAYFEATYY-KLKHPEWPCAQTGSKSSPQFLPMEVCFTPGTQKSRKETPMQVATIIKQTCTPPYDRRQKIEAQVAEAHFENDGILAAFGLNVTQKMMAVEARQLPDPELEYNQAIERPRDGSWNMRGKGFYEGMDLDSFAILNLG--DDRGIVNFFNKLVDQLGELKMRGPRGAAPPLLTRTRNQSVEDLFGEAVRAAEKVYGKPPRVVFCVNGGGDSANYADLKRASDVNFGIPSQCMLAKHVGKASPQYIANLMLKVNMKLGGRNVVCRGALPKISECPTIIFGADVTHPVSIDKSKPSISSVVATMDRFASHHAACVRKQGHRVEHEDMEGITNELLRSFYQATHVKPERILIYRDGISEGQFQNILSKEVQAIRQACESLEPGYRPAITFVVVQKRHHTRIFPTAAMDADRSGNCKAGTVVDTGICHPTEHDFYLMSHSGLQGCSRPAHYHVLMDEIGFAPNELQTLTYHLCYTFARCTRAVSVVPACYYSHLVAERARLFLI
>Ap_invaAGO1a
RAIVVWANHFQVDLNPNGDIFHYDVMFCNKGDTLQA-PNKELCVRVLKALINTLKDEFPAITVVSDARRSIYASAELPFNNRMIPVREVFETGKSKEWDVYVKAVDAIPMDRVLEFFAGRINFTPAIMALDIALRATANDRFVSVGRNFFGQSGKMNLPEGADLWFGYHQSLRPTQTRLTLNVDMAATTFIKKANLVDYIAEAAVNFEDPTL-----KAAHRVVKGVRVCVTHRGGLKQEVNGLTATPASAFFADLEGNQQSVAAYFESKYY-RLKHPEWPCVQTGSKNKPQHLPLEVCVTTGTQKSRKETPNQVAAMIKQTCTPPDDRRRKIETQVANAHFESDSCLSAFGLTVSSTMLAVEARQLPDPELVYNQSYERPREGTWNLRGKGFYEGMDLDSFAIINLG--EERNIAGFFRKLVDQLGALNMRGPRGPVPDVISRHRNQSVEDVFADAVRYAEKTYGMPPKVVFCVNGNGDTTNYADLKRASDINFGIPSQCMLQRHIGKASPQYIANIMMKVNMKLGGRNVICRGDLPKISERPTIILGCDVTHPVSIDKSKPSIASVVATMDRFASHHAACVRKQGHRVEHEDLAGITHELLRRFYQATHVKPERILIYRDGISEGQFSNILKKEVGLIRQACKTLEEDYQPAITYVVVQKRHHTRIFPTAAMDADRSGNCKAGTVVDTGICHPTEHDFYLMSHSGLQGCSRPAHYHVLLDEIQFGPNELQMLTYHLCYTFARCTRAVSVVPACYYSHLVAERSRFFLN
>Ph_sojaAGO7
EAVRMWANEVTRNLDRS----TWDAAIAS-------PPPQRILNLLRASLAGMRRSAHTALDCVNSALAN-YAVLRQ--DLRAFSLRLDSHEARKAAIEASIRDMEANPTEHMENL--RDFEHEPPRSSKDPTSPASSKQRFTVVGRNLLSSADAEALGEGAEL--RYHQSLRPTQNRLVVNLDLAATAFVKDMSVMDYLGETL---------------------GVKVNVPHRPGVKRSVNGLSKDSAENFFEDDEGQRMPIVQYFQRAYNIHLSYPELPCLHVGAPQK-NYLPLE---------------------------RPEERKHAVEQKLYEAGFDTDPTLRAFGLEVDP--------------------------------NMKFNAPTQLQSWAI-------------FNEQAWHELSEDAAPGSVEAEPTG---------RSMFQEAVTAAMETFNSKPEIVWMINPTSDTRAYKELKLMSDTELGIVSQCMLAKHILKCNLQYIANMLMKVNTKLGGKNGVIRDPPPQVSPSHTIIFGADVTHPSPMDKTRPSIAAVTASMDNNFIHHASAIRAQGHRVEQMNLKEMTMELMKRFYRSTGGKPDRIVFYRDGVSEGQFLMVLNHEVTGIREACRALEKDYTPSITFIVVQKRHSTRLFPSDSNEADRSGNVK----------------------------------------IGFSADDLQRLTYQLCYTFARCTRSVSMVPSAYYSHLVAFRARLFLV
>Al_laibAGO2
KNTKLFAKQLENVIETSSSLPHYDVQYNSAGEKFTNGLRKTVANHLMKRLMANLKNEFPALTVVKDGRKSIYTASKLPFTEKKFENLQLSDQAKPKPYCCLVKEA-VVNVNQLQVYLQEKLNCMPALQAMDIALRHTTSTGFVSAGRILYAPNDARISGKMPSI---NCQELR----------------------------------------------------------------------------------------------------ALRYPGLPFLHVGAMQKKNYLSMEVCHILAGQKTQKVTGNQ----------------RRIVQKLRDAGFERELVLKAFGLVVNSKMVSAKARV--------------------------------FESQKSLTCVD------------------------SVAIPPIILKKQDFAKIRDLFPDALNKAWTLFNSPVQIICIINPTADTVVHGELKRLSDIE----------------------------N----------------------------VTHPGVSERTRSSSAAVFASMDQDCIRYAATLRVQGHRVEQVNCKKWRTNFLYFSIKNQESSPGASCSYRDGFSEGEFEMVLTHEVIAIRAACASLEKDYMPAITFVVVQKRHNTRLFAVDQKDTDRRGMSKLAQL-----------------------------------------------------------------------------------
>Ph_vexaAGO2
KEIRVYANYYPVTLKGD-DVFHYDVAIKESGTD---KPPKTLAMKVVKTLVTEICRDYPDTSVATDGWKGLFSNKGLPFNEHQFTGLRPGDEGPARVFDALVKEV-VIQTMKLNDHVAGRVSSTPVLQALDIVLRFSQSNRLIPIGRNLFSTIPGKPIGRGAELRSGQFQSLRPTQNGLVLNFDLSYTAFVRAQPVLGFVKEVLGMNADPTLDKRQSKLVSKEIRGVKIEETHRPGVRRNVKGLSRLGADKFFTMVNGEKVSIAQYFKKVYDITLRFPKLPCLQVGAVERGIYIPMEWCRIAKDQKLRKVSDRQQVN-----ANATGDRKTAIEGKFREAGFHANPLIQAFGIGGSLEMTVAKARQLRPPVVIYGSINAKPDNGAWNLVNKTFIAGAELKSWAVISDCAFSITDVQQSVTNLTKKMDRLGIVCPSRQPPIILNKG---SVKVMVDLAIQQAMDVYNAKPQLILMITPTRNSDSHDELKRISDSDLGFCSQCIVKKNFIKVHDQILSNLSMKINMKLGGVNAIVHGLPLRVLEQRTMIIGADVNHPNSRDTMEPSIAAVVGSMDNSFARYSATFQPQGHGMEMEGLQGMVSTLLEQFRAARDALPTQIVFFRDGVSEGQFQMALIHELTAIRDACSAFE--FQPPITFVVVQKRHHTRFFPTDQRDADKSGNLKAGTVVDQGVCHPTEFDFFLQSHGGLIGTSRSSHYHVLWDEMNFTPDELQVLINSLCYTFARATRAVSIVPPVYYADLLAYRARLFVQ
>Ec_siliAGO
KQVVVTANHYKADYNSKQLLYQYDVSLEG----FEKTLPAAKLRAIFQKKEQHSASSLGGIAFTYDGRSVMITARPLPFPAASFVVVFEPATEEANNFTVILKQVAQRRLADLAVFFSGQTSQNACITALDISLRHAPSMKLTCVGRSFFTPDMPSPISGGAEVWLGYYQSLRATQAGLTLNVDMSAMAFVRSMPMMDFVCELLDPGQLSRIRPYDRRKLETALKGVNVEVTHRK-SNRQVSALSKIGADQTFPDQESGRDIVARYFGEKYF-KLRYPSLPCVRIGSASKHNYIPMEVCQIAQGQKVAKLDEKQTADMIKITCQRPDVRQGAIHQQFNNINADMNKSCEQFGIRITNKQIQTQARILPPPCIQYRQQTEQPQCGSWNLRDKKMFDNKKLVSWAVVCFTDLQLQGAEHFVSELVKVMGTHGMSPEARRPPILMADSRVDDARNALTAARDAARKKFKVDCQLILVPKPTQDSKDYGEIKLASDTVLGIPSQCVLLKHVHTAKIQYLANLCLKINAKLGGRNAVPRDKLPFVQDAPTIVFGADVNHPGAGNVSKPSIAAVVASMDRWVSRHGSCVAVQEHRKEVQDLASMVKNLLISFYRVNNAKPARIIFFRDGVSEGQFREVLRYEVRAIEQACAALEVGYRPTITFIVVQKRHHTRLFQPNRDDQDKSGNVFPGTVVETGICHPMEWDFYLMSHGGLQGTSRPAKYHVLWDENAFDSDSLQLLCYHLCFMYCRCTRSVSIPPAVYYAHLVAFRAQFFVN
>Ph_sojaAGO2
KSMQLQVNYFGVSLDSLGEIFKYHVDVERKDETMGDRLPRSLVRNVINAALRQYESEFGGIRVVHDGMSAMYAPAILPWDAKTFVDINPDGPSGPRTFVVKIKLAETIATSSLTDYYSNDVNVMPVLQALDVAARHLGAQRLIAVGRNFFSMKKTFPLKGGKELCWGYHQAIRIADRKVLMNVDQAATVFYAPKELMELVLAALSPNDIRGLSDRDGKNLARALRKIEVVPTHRKDRKRAIFGISAQPANQTIVSIKGESMSVADYFSKRYNMNLRYPQLPLVNVGSKRKENWLPIELCEVAPGQRCPNINELDTAEIIRQTSQNPRTRQENIIDQVRQAGFENDPYLDAFGIKVEQRLESTDARVMDPPDVQYANVSERPSGGQWNLRDKRFVEGATMRNWGVVITANVGERDVQGFIRNMVDMAGKSGLTIEDSNPVIIHMDSRGAQVEELMQTCFKELESRNRGPPQLIMVIKQDKSVGSYGDIKRMSDTVLGIPSQCIVSQNVRNAKPQYCANVCLKINMKLSGKNSILRESLPLVSDAPTIIIGADVEHPRSGMGSRPSIASVVASLDRYSAKYVARVAAQKASSDIQLLPHMLRDLFLAYYQSTNRKPEHVIYYRDGVSEGQFYDILQTEMRALRKAFKMISDGYNPPVTFIIVNKRHHMRAFPINPRDADRKGNVVPGTVIDTGIVDSHRFDFFLYGHSGIQGTSVPCHYTVLHDENKLSAEDVQRLTYHLGYTFARCTRSVSFATPAYYAHLAAGRARFFLN
>Ph_niedAGO2
--MQLQVNYFGVSLDSLGEIFKYHVDVERKDETMGDRLPRSLVRNVINAALRQYESEFGGIRVVHDGMSAMYAPAILPWDAKTFVDINPDGPSGPRTFVVKIKLAETIATSSLTDYYSNDVNMMPVLQALDVAARHLGAQRLIAVGRNFFSMKKTFPLKGGKELCWGYHQAIRIADRKVLMNVDQAATVFYAPKELMELVLAALSPNDIRGLSDRDGKNLARALRKIEVVPTHRKDRKRAIFGISAQPANQTIVSIKGESMSVADYFSKRYNMNLRYPQLPLVNVGSKRKENWLPIELCEVAPGQRCPNINELDTAEIIRQTSQNPRTRQENIIDQVRQAGFENDPYLDAFGIKVEQRLESTDARVMDPPDVQYANVSERPSGGQWNLRDKRFVEGATMRNWGVVITANV------GFIRNMVDMAGKSGLTIEDSNPVIIHMDSRGAQVEELMQTCFKELESRNRGPPQLIMVIKQDKSVGSYGDIKRMSDTVLGIPSQCIVSQNVRNAKPQYCANVCLKINMKLSGKNSILRESLPLVSDAPTIIIGADVEHPRSGMGSRPSIASVVASLDRYSAKYVARVAAQKASSDIQLLPHMLRDLFLAYYQSTNRKPEHVIYYRDGVSEGQFYDILQTEMRALRKAFKMISDGYNPPVTFIIVNKRHHMRAFPINPRDADRKGNVVPGTVIDTGIVDSHRFDFFLYGHSGIQGTSVPCHYTVLHDENKMSAEDVQRLTYHLGYTFARCTRSVSFATPAYYAHLAAGRARFFLN
>Ph_pisiAGO2
KSMQLQVNYFGVSLDSLGEIFKYHVDVERKDETMSDRLPRSLVRNVINAALRQYESEFGGIRVVHDGMSAMYAPAILPWDAKTFVDINPDGPSGPRTFVVKIKLAETIATSSLTDYYSNDVNVMPVLQALDVAARHLGAQRLIAVGRNFFSMKKTFPLKGGKELCWGYHQAIRIADRKVLMNVDQAATVFYAPKELMELVLAALSPNDIRGLSDRDGKNLARALRKIEVVPTHRKDRKRAIFGISAQPANQTIVSIKGESMSVADYFSKRYNMNLRYPQLPLVNVGSKRKENWLPIELCEVAPGQRCPNINELDTAEIIRQTSQNPRTRQENVIDQVRQAGFENDPYLDAFGIKVEQRLESTDARVMDPPDVQYANVSERPSGGQWNLRDKRFVEGATMRNWGVVITANVGERDVQGFIRNMVDMAGKSGLTIEDSNPVIIHMDSRGAQVEELMQTCFKELESRNRGPPQLIMVIKQDKSVGSYGDIKRMSDTVLGIPSQCIVSQNVRNAKPQYCANVCLKINMKLSGKNSILRESLPLVSDAPTIIIGADVEHPRSGMGSRPSIASVVASLDRYSAKYVARVAAQKASSDIQLLPHMLRDLFLAYYQSTNRKPEHVIYYRDGVSEGQFYDILQTEMRALRKAFKMISDGYNPPVTFIIVNKRHHMRAFPINPRDADRKGNVVPGTVIDTGIVDSHRFDFFLYGHSGIQGTSVPCHYTVLHDENKMSAEDVQRLTYHLGYTFARCTRSVSFATPAYYAHLAAGRARFFLN
>Ph_cinnAGO2
--MQLQVNYFGVSLDSLAEIFKYHVG----------RLPRTLVRNVINAALRQYEAEFGGIRVVHDGMSAMFAPSLLPWEAKTFVDINPDGPSGPRTFVVKIKLAETIASNSLTDYYSNDVNVMPVLQALDVAARHLGAQRLIAVGRNFFSMKKTFPLKGGKELCWGYHQAIRIADRKVLMNVDQAATVFYAPKELMELVLAALSPNDIRGLSDRDAKNLARALRKIEVVPTHRKDRKRAIFGISAQPANQTIVSIKGETMSVADYFSKRYNMNLRYPQLPLVNVGSKRKENWLPIELCEVAPGQRCPNINELDTAEIIRQTSQNPRTRQENIIDQVRQAGFENDPYLGAFGIKIEQRLETTDARVMDPPDVQYANVSERPSGGQWNLRDKRFVEGATMRNWGVVITANVGERDVQGFIRNLVDMAGKSGLTIEDSNPHIVHMDHRGAQVEELMQTCFKELESRNRGPPQLIMVIKQDKSVGSYGDIKRMSDTVLGIPSQCIVSQNVRNAKPQYCANVCLKINMKLSGKNSILRESLPLVSDAPTIIIGADVEHPRSGIGSRPSIASVVASLDRYSAKYVARVAAQKASSDIQLLPHMLRDLFLAYYQSTNRKPEHVIYYRDGVSEGQFYDILQTEMRALRKAFKMISDGYNPPVTFIIVNKRHHMRAFPINPRDADRKGNVVPGTVIDTGIVDSHRFDFFLYGHSGIQGTSVPCHYTVLHDENKMTAEDVQRLTYHLGYTFARCTRSVSFATPAYYAHLAAGRARFFLN
>Ph_fragAGO2
KSMQLQVNYFGISLDSLGEIFKYHVDVERKDETMGDRLPRTLVRNVINAALRQYETEFGDIRVVHDGMSAMYAPKILPWDAKTFVDINPDGPSGPRTFVVKIKLAETIATSSLTDYYSNDVNVMPVLQALDVAARHLGAQRLIAVGRNFFSMKKTFPLKGGKELCWGYHQAIRIADRKMLMNVDQAATVFYAPKELMELVLAATSPNDIRVSSERDAKNLARVLRKLEVVPTHRKDRKRAIFGISGQPANQTMVSIKGESMSVADYFSKRYNMNLRYPQLPLVNVGSKRKENWLPIELCEVAPGQRCPNINELDTAEIIKQTSQNPRVRQENIVDQVRQAGFENDPYLAAFGIKVDQRLETADARVMDPPDVQYANVSERPSGGQWNLRDKRFVEGATMRNWGVVITANVSERDVQGFIRNLVDMAGKSGLTIEDSNPHVIHMDSRGAQVEELMQMCFKELESRNRGPPQLIMVIKQDKSTGSYGDIKRMSDTVLGVPSQCIVAQNVRSAKPQYCANVCLKINMKLSGKNSILRESLPLVSDAPTIIIGADVEHPRSGMGSRPSIASVVASLDRYSAKYIARVAAQKASSDIQLLPHMLRDLFLAYYESTNRKPERVIYYRDGVSEGQFYDILQTEMRALRKAFKMISDGYNPPVTFIIVNKRHHMRAFPINPRDADRKGNVVPGTVIDTGIVDSHRFDFFLYGHSGIQGTSVPCHYTVLHDENKMTAEDVQRLTYHLGYTFARCTRSVSFATPAYYAHLAAARARFFLN
>Ph_rubiAGO2
KSMQLQVNYFGISLDSLGEIFKYHVDVERKDETMGDRLPRTLVRNVINAALRQYETEFGDIRVVHDGMSAMYAPKILPWDAKTFVDINPDGPSGPRTFVVKIKLAETIATSSLTDYYSNDVNVMPVLQALDVAARHLGAQRLIAVGRNFFSMKKTFPLKGGKELCWGYHQAIRIADRKMLMNVDQAATVFYAPKELMELVLAATSPNDIRVSSERDAKNLARALRKLEVVPTHRKDRKRAIFGISGQPANQTMVSIKGESMSVADYFSKRYNMNLRYPQLPLVNVGSKRKENWLPIELCEVAPGQRCPNINELDTAEIIKQTSQNPRVRQENIVDQVRQAGFENDPYLAAFGIKVDQRLETADARVMDPPDVQYANVSERPSGGQWNLRDKRFVEGATMRNWGVVITANVSERDVQGFIRNLVDMAGKSGLTIEDSNPHVIHMDSRGAQVEELMQMCFKELESRNRGPPQLIMVIKQDKSTGSYGDIKRMSDTVLGVPSQCIVAQNVRSAKPQYCANVCLKINMKLSGKNSILRESLPLVSDAPTIIIGADVEHPRSGMGSRPSIASVVASLDRYSAKYIARVAAQKASSDIQLLPHMLRDLFLAYYESTNRKPERVIYYRDGVSEGQFYDILQTEMRALRKAFKMISDGYNPPVTFIIVNKRHHMRAFPINPRDADRKGNVVPGTVIDTGIVDSHRFDFFLYGHSGIQGTSVPCHYTVLHDENKMTAEDVQRLTYHLGYTFARCTRSVSFATPAYYAHLAAARARFFLN
>Ph_ramoAGO2
--MQLSVNYFGVSLDTVAEIFKYHVDVERKDETMGDRLPRALVRNVINAALRQYETEFGGIRVVHDGMSAMYAPAMIPWEAKTFVDVNPDGPSGPRTFVVKIKLAETISTSSLTDYYSNDVNVMPVLQALDVAARHLGAQRLIAVGRNFFSMKKTFPLKGGKELCWGYHQAIRIADRKLLMNVDQAATVFYAPKELMELVLAALSPNDIRGLSDRDAKALARALRKIEVVPTHRKDRKRAIFGISAQPANLTMVNIKGEEMSVADYFNKRYNVQLRHPQLPPVNVGSKRKENWLPMELCEVAPGQRCANINELDTAEIIKQTSQPPRARKETIIDQVRQAGFENDPYLAAFGMKVEQRLEATDARVMDPPEVQYANVSERPSGGQWNLRDKRFVEGATLRNWGVVITANVGERDVQGFVRNLVDMAGKSGLTIEDSNPHMIHMDQRGSQVEELMKMCFKELESRNRGPPQLIMVIKQDKGVGSYGDIKRMSDTVLGIPSQCIVSQNVRSAKPQYCANVCLKINMKLSGKNSILREELPLVSTAPTIIIGADVEHPRSGMGGRPSIASVVASLDRYSAKYVARVAAQKASSDIQLLPHMLRDLFLAYYQSTNRKPEHVIYYRDGVSEGQFYDILQTEMRALRKAFKMISEGYNPPVTFIIVNKRHHMRAFPVNQRDADRKGNVVPGTVIDTGIVDSHRFDFFLYGHSGIQGTSVPCHYTVLHDENKMSAEDVQRLTYHLGYTFARCTRSVSFATPAYYAHLAAGRARFFLN
>Ph_lateAGO2
KSMQLNVNYFGVSLDTVAEIFKYHVDVERKDEIMGDRLPRSLVRNVINAALRQYETEFGGIRVVHDGMSAMYAPAMIPWEAKTFVDVNPDGPSGPRTFVVKIKLAETISTNSLTDYYSNDVNVMPVLQALDVAARHLGAQRLIAVGRNFFSMKKTFPLKGGKELCWGYHQAIRIADRKLLMNVDQAATVFYAPKELMELVLAALSPNDIRGLSDRDAKALARALRKIEVVPTHRKDRKRAIFGISAQPASLTMVNIKGEEMSVADYFNKRYNVQLRHPQLPPVNVGSKRKENWLPMELCEVAPGQRCANINDLDTAEIIKQTSQPPRARKETIIDQVRQAGFENDPYLAAFGMKVDQRLEATDARVMDPPEVQYANVSERPSGGQWNLRDKRFVEGATLRNWGVVITANVGERDVQGFVRNLVDMAGKSGLTIEDSNPHMIHMDQRGSQVEELMKMCFKELESRNRGPPQLIMVIKQDKGVGSYGDIKRMSDTVLGIPSQCIVSQNVRSAKPQYCANVCLKINMKLSGKNSILREDLPLVSTAPTIIIGADVEHPRSGMGGRPSIASVVASLDRYSAKYVARVAAQKASSDIQLLPHMLRDLFLAYYQSTNRKPEHVIYYRDGVSEGQFYDILQTEMRALRKAFKMISEGYNPPVTFIIVNKRHHMRAFPVNQRDADRKGNVVPGTVIDTGIVDSHRFDFFLYGHSGIQGTSVPCHYTVLHDENKMSAEDVQRLTYHLGYTFARCTRSVSFATPAYYAHLAAGRARFFLN
>Ph_crypAGO2
KSMQLNVNYFGISLDQATEIFKYHVDVERKDETMGDRLPRSLVRNVINAALRQYETEFGGIRVVHDGMSAMYAPAMIPWEAKTFVDVNPDGPSGPRTFVVKIKLAETISTASLTDYYSNDVNVMPVLQALDVAARHLGAQRLIAVGRNFFSMKKTFPLKGGKELCWGYHQAIRIADRKLLMNVDQAATVFYAPKELMELVLAALSPNDIRGLSDRDAKALARALRKIEVVPTHRKDRKRAIFGISAQPANQTMVSIKGENMSVADYFHKRYNVQLRHPQLPPVNVGSKRKENWLPMELCEVAPGQRCANINELDTAEIIRQTSQPPRSRQETIVDQVRQAGFENDPYLAAFGMKVDQRLETTDARVMDPPDVQYANVSERPSGGQWNLRDKRFVEGATLRNWGVVITANVNDRDVQGFVRNLVDMAGKSGLSIEDSNPHMVHMDQRGSQVEELMKMCFKELESRNRGPPQLIMVIKQDKGVGSYGDIKRMSDTVLGIPSQCIVAQNVRSAKPQYCANVCLKINMKLSGKNSILREQLPLISTAPTIIIGADVEHPRSGMGGRPSIASVVASLDRYSAKYIARVAAQKASSDIQLLPHMLRDLFLAYYASTNRKPEHVIYYRDGVSEGQFYDILQTEMRALRKAFKMISDGYNPPVTFIIVNKRHHMRAFPVNQRDADRKGNVVPGTVIDTGIVDSHRFDFFLYGHSGIQGTSVPCHYTVLHDENKMSAEDVQRLTYHLGYTFARCTRSVSFATPAYYAHLAAGRARFFLN
>Ph_syriAGO2
KSMQLNVNYFSLSLDQAAEIFKYHVDVERKDENMGDRLPRTLVRNVINAAIRQYESEFGGIRVVHDGMSAMYAPTMIPWEAKTFVDVNPDGPSGPRTFVVKIKLAETISTASLTDYYSNDVNVMPVLQALDVAARHLGAQRLIAVGRNFFSMKKTFPLKGGKELCWGYHQAIRIADRKLLMNVDQAATVFYAPKELMELVLAALSPNDVRGLSDRDAKALARALRKIEVVPTHRKDRKRAIFGISALPANQTMVDIKGESMSVADYFQKRYNMQLRHPVLPLVNVGSKRKENWLPIELCEVAPGQRCANINELDTAEIIKQTSQPPRARQETIVDQIRQAGFENDPYLAAFGMKVDQRLETADARVMDPPDVQYANVSERPSGGQWNLRDKRFVEGATLRNWGVVITANVGERDVQGFVRNLVDMAGKSGLTIEDSNPHMIHMDQRGSQVEELMKMCFKELESRNRGPPQLIMVIKQDKGVGSYGDIKRMSDTVLGIPSQCIVSQNVRSAKPQYCANVCLKINMKLSGKNSILREDLPLVSSAPTIIIGADVEHPRSGMGSRPSIASVVASLDRYSAKYIARVAAQKASSDIQLLPHMLRDLFLAYYQSTNRKPEHVIYYRDGVSEGQFHDILQTEMRALRKAFKMISEGYNPPVTFIIVNKRHHMRAFPVNQRDADRKGNVVPGTVIDTGIVDSHRFDFFLYGHSGIQGTSVPCHYTVLHDENKMSAEDVQRLTYHLGYTFARCTRSVSFATPAYYAHLAAGRARFFLN
>Ph_infeAGO3
----MQVNYFGVSLDSAPEIIKYHVDVERKDEIMGDRLPRSLVRNVINAALRQYEAEFGGVRVVHDGMSAMYAPAVLPWESKTFVDVNPDGPSGPRTFVVKIKMAETISTTSLQDYYSNDVNVMPVLQALDVAARHLGAQRLITVGRNFFSMKKTFPLKGGKELCWGYHQAIRVADRKLLMNVDQAATVFYAPKELMELVLPALSANDIRALSDRDARNLARALRKIEVVPTHRKDRKRAIFGISAQPANQTIQSIKGESMSVADYFNKRYNINLRYPHLPLVNVGSKRKENWLPIELCEVAPGQRCANINELDTAEIIRQTSQPPRARQETIIDQVRQAGFENDPYLAAFGMKVEQRLEATEARVMDPPDVQYANVSERPSGGQWNLRDKRFVEGATMRNWGVVISANVGERDVQGFIRNLVDMAGKSGLTIEDSSPHMVHMDQRGAQVEELMKMCFKELEARNRGPPQLIMVIKQDKSVGSYSDIKRMSDTVLGIPSQCIVSQNVRSAKPQYCANVCLKINMKLSGKNSILREPLPLVSTAPTIIIGADVEHPRSGMGSRPSIASVVASLDRYSAKYVARVAAQKASSDIQLLPHMLRDLFLAYYQSTNRKPEHVIYYRDGVSEGQYYDILQTEMRALRKAFKMISDGYNPPVTFIIVNKRHHMRAFPNNPRDADRKGNVVPGTVIDTGIVDSHRFDFFLYGHSGIQGTSVPCHYTVLHDENKMSAEDVQRLTYHLGYTFARCTRSVSFATPAYYAHLAAGRARFFLN
>Ph_paraAGO2
KSVQMQVNYFGVSLDSAPEIFKYHVDVERKDETMGDHLPRSLVRNVINAALRQYEAEFGGIRVVHDGMSAMYAPAVLPWDSKTFVDVNPDGPSGPRTFVVKIKMAETISTNSLKDYYSNDVNVMPVLQALDVAARHLGAQRLITVGRNFFSMKKTFPLKGGKELCWGYHQAIRVADRKLLMNVDQAATVFYAPKELMELVLPALSANDIRALSERDARNLARALRKIEVVPTHRKDRKRAIFGISAQPANQTIQSIKGESMSVADYFSKRYNINLRYPHLPLVNVGSKRKENWLPIELCEVAPGQRCANINELDTAEIIRQTSQPPRARQETIIDQVRQAGFENDPYLAAFGMKVEQRLEVTEARVMDPPDVQYANVSERPSGGQWNLRDKRFVEGATMRNWGVVISANVGERDVQGFIRNLVDMAGKSGLTIEDSNPHMIHMDQRGAQVEELMKMCFKELEARNRGPPQLIMVIKQDKSVGSYSDIKRMSDTVLGIPSQCIVSQNVRSAKPQYCANVCLKINMKLSGKNSILREPLPLVSTAPTIIIGADVEHPRSGMGSRPSIASVVASLDRYSAKYVARVAAQKASSDIQLLPHMLRDLFLAFYQSTNRKPEHVIYYRDGVSEGQYFDILQTEMRALRKAFKMISENYNPPVTFIIVNKRHHMRAFPNNPRDADRKGNVVPGTVIDTGIVDSHRFDFFLYGHSGIQGTSVPCHYTVLHDENKMSAEDVQRLTYHLGYTFARCTRSVSFATPAYYAHLAAARARFFLN
>Ph_idaeAGO2
KSAQMQVNYFSVSLDAAPEIFKYHVDVERKDETMGDRLPRSLVRNVINAALRQYEAEFGGIRVVHDGMSAMFAPAVLPWESKTFVDVNPDGPSGPRTFVVKIKLPESISTHSLKDYYSNDVNVMPVLQALDVAARHLGAQRLITVGRNFFSMKKTFPLKGGKELCWGYHQAIRVADGKLLMNVDQAATVFYAPKELMELVLPALSANDIRCLSDRDARNLARALRKIEVVPTHRKDRKRAIFGISAQPANETIQTIKGESMSVADYFNKRYNINLRYPNLPLVNVGSKRKENWLPIELCEVAPGQRCANINDLDTAEIIRQTSQPPRARQETIIDQVRQAGFENDPYLAAFGMKVEQRLETTEARVMDPPDVQYANVSERPSGGQWNLRDKRFVEGATMRNWGVVISANVGERDVQGFIRNLVDMAGKSGLTIEDSNPHMVHMDQRGAQVEELMKI-----------------------------DIKRMSDTVLGIPSQCIVSQNVRSAKPQYCANVCLKINMKLSGKNSILREPLPLVSTAPTIIIGADVEHPRSGMGSRPSIASVVASLDRYSAKYVARVAAQKASSDIQLLPHMLRDLFLAYYQSTNRKPEHVIYYRDGVSEGQYYDILQTEMRALRKAFKMISEGYNPPVTFIIVNKRHHMRAFPANPRDADRKGNVVPGTVIDTGIVDSHRFDFFLYGHSGIQGTSVPCHYTVLHDENKMSAEDVQRLTYHLGYTFARCTRSVSFATPAYYAHLAAGRARFFLN
>Ph_litcAGO2
KTAQLQVNYFSVSLDQAPEIFKYHVDVERKDETMGDRLPRSLVRNVINAALRQYEAEFGGIRVVHDGMSAMYAPAMLPWTAKTFVDINPDGPSGPRTFVVKIKMAETISTTSLTDYYSNDVNVMPVLQALDVAARHLGAQRLITVGRNFFSMKKTFPLKGGKELCWGYHQAIRVADRKLLMNVDQAATVFYAPKELMELVLPALSANDIRGLSDRDGKNLARALRKIEIVPTHRKDRKRAIFGISAQPANQTMVSIKGENMSVADYFSKRYNVNLRYPQLPLVNVGSKRKENWLPIELCEVAPGQRCANINDLDTAEIIRQTSQPPRARQETIIDQVRQAGFENDPYLAAFGMKVEQRLETTEARVMDPPDVQYANVSERPSGGQWNLRDKRFVEGATMRNWGVVITANVSERDVQGFVRSLVDMAGKSGLTIEDSNPHMVHMDQRGAQVEELMKMCHSELKARNRGPPQLIMVIKQDKSVGSYSDIKRMSDTVLGVPSQCIVAQHVRGAKPQYCANVCLKINMKLSGKNSILRENLPLVSSAPTIIIGADVEHPRSGMGSRPSIASVVASLDRYSAKYVARVAAQKASSDIQLLPHMLRDLFLAYYQSTNRKPEHVIYYRDGVSEGQYYDILQTEMRALRKAFKMISDGYNPPVTFIIVNKRHHMRAFPTNSRDADRKGNVNPGTVIDTGIVDSHRFDFFLYGHSGIQGTSVPCHYTVLHDENKMSADDVQRLTYHLGYTFARCTRSVSFATPAYYAHLAAGRARFFLN
>Ph_palmAGO2
----------------------------------------------------------------------MYAPAMLPWAAKTFVDINPDGPSGPRTFVVKIKMAETISTASLTDYYSNDVNVMPVLQALDVAARHLGAQRLITVGRNFFSMKKTFPLKGGKELCWGYHQAIRVADRKLLMNVDQAATVFYAPKELMELVLPSLSANDIRGLSDRDGRNLARALRKIEVVPTHRKDRKRAIFGISAQPANQTMVNIKGENMSVADYFNKRYNVNLRYPQLPLVNVGSKRKENWLPIELCEVAPGQRCANINDLDTAEIIRQTSQPPRARQETIIDQVRQAGFENDPYLAAFGMKVEQRLETTEARVMDPPDVQYANVSERPSGGQWNLRDKRFVEGATMRNWGVVITANVSERDVQGFVRNLVDMAGKSGLTIEDSNPHMIHMDQRGSQVEELMKMCHSELKARNKGPPQLIMVIKQDKSVGSYSDIKRMSDTVLGVPSHMLLVW-----QP-----------------------------------IGADVEHPRSGMGSRPSIASVVASLDRYSAKYVARVAAQKASSDIQLLPHMLRDLFLAYYQSTNRKPEHVIYYRDGVSEGQYYDILQTEMRALRKAFKMISDGYNPPVTFIIVNKRHHMRAFPANSRDADRKGNVNPGTVIDTGIVDSHRFDFFLYGHSGIQGTSVPCHYTVLHDENKMSAEDVQRLTYHLGYTFARCTRSVSFATPAYYAHLAAGRARFFLN
>Ph_megaAGO2
----MQVNYFGVSLDQAPEIFKYHVDVERKDETMGDRLPRSLVRSVINAALRQYETEFGGIRVVHDGMSAMYAPVMLPWANKTFVDVNPDGPSGPRTFMVKIKMAETISTTSLTDYYSNDVNVMPVLQALDVAARHLGAQRLITVGRNFFSMKKTFPLKGGKELCWGYHQAIRVADHKLLMNVDQAATVFYAPKELMELVLPALSANDIRGLNDRDAKNLARALRKIEVVPTHRKDRKRAIFGISAQPANQTMVNIKGENMSIADYFSKRYNLNLRYPNLPLVNVGSKRKENWLPIELCEVAPGQRCANINDLDTAEIIRQTSQPPRARQETIIDQVRQAGFENDPYLAAFGMKVEQRLETTEARVMDPPDVQYANVSERPHGGQWNLRDKRFVEGATMRNWGVVITANVGERDVQGFVRNLVDMAGKSGLIIEDSNPHIVHQDQRGAQVEELMKMCHTELKARNRGPPQLIMVIKQDKGVGSYSDIKRMSDTVLGIPSQCIVAQHVRSAKPQYCANVCLKINMKLSGKNSILREDLPLISSAPTIIIGADVEHPRSGMGGRPSIASVVASLDRYSAKYIARVAAQKASSDIQLLPHMLRDLFLAYYQSTNRKPEHVIYYRDGVSEGQYYDILQTEMRALRKAFKMISDGYNPPVTFIIVNKRHHMRAFPVSQRDADRKGNVNPGTVIDTGIVDSHRFDFFLYGHSGIQGTSVPCHYTVLHDENKMSADDVQRLTYHLGYTFARCTRSVSFATPAYYAHLAAGRARFFLN
>Ph_totaAGO2
KSMQLQVNYFSVSLDSAAEIFKYHVDVERKDETMGDRLPRSLVRNVINAALRQYEAEFGGIRVVHDGMSAMYAPTMLPWEAKTFVEVNPDGPSGPRTFVVKIKLAETISTSSLTDYYSNDVNVMPVLQALDVAARHLGAQRLITVGRNFFSMKKTFPLKGGKELCWGYHQAIRIADRKLLMNVDQAATVFYAPKELMELVLPALSANDIRALSDRDGKNLARALRKIEVVPTHRKDRKRAIFGVSAQPSNKTIVEIKGESMSIADYFSKRYNVNLRYPDLPLVNVGSKRKENWLPIELCEVAPGQRCANINELDTAEIIRQTSQPPRARQETIIDQVRQAGFENDPYLAAFGMKVEQRLESTDARVMDPPDVQYANVSERPSGGQWNLRDKRFVEGATMRNWGVVITANVGERDVQGFVRSLVDMAGKSGLTIEDSNPHMIHMDQRGAQVEELMKMCFKELEARNKGPPQLIMVIKQDKSVGSYGDIKRMSDTVLGIPSQCIVSQNVRSAKPQYCANVCLKINMKLSGKNSILREALPLVSTAPTIIIGADVEHPRSGMGSRPSIASVVASLDRYSAKYVARVAAQKASSDIQLLPHMLRDLFLAYYQSTNRKPEHVIYYRDGVSEGQYYDILQTEMRALRKAFKMISEGYNPPVTFIIVNKRHHMRAFPVNQREGDRKGNVVPGTVIDTGIVDSHRFDFFLYGHSGIQGTSVPCHYTVLHDENKMSAEDVQRLTYHLGYTFARCTRSVSFATPAYYAHLAAGRARFFLN
>Ph_capsAGO2A
RSIQLQVNYFGVSLDAAAEIFKYHVDVERKDEPMGDRLPRSLVRNVINAALRQYETEFGGIRVVHDGMSAMYAPAMLPWDGKTFVDVNPDGPSGPPTFVVKIKLAETIATSSLTDYYTNDVNAMPVLQALDVAARHLGAQRLITVGHSFFSMKKTTPLQGGKELCWGYHQAIRIADRKLLMNVDQAATVFYAPKELMELVLPALSANDIRGLSDRDAKNLARALRKIEVVPTHRKDRKRAIFGISAQPANQTMVNIKGESMSVADYFSKRYNTNLRYPHLPLVNVGSKRKENWLPIELCEVAPGQRCANISDLDTAEIIRQTSQPPRARQETIIDQVRQAGFENDPYLAAFGMKVDQRLETTDARIMDPPDVQYSNVSERPNNGQWNLRDKRFVEGATLRNWGVVITANVGERDVQGFVRTLVDMAQRSGLTIEDSNPYMIHMDHRGAQVEELMKMCHKELEARNKGPPQLIMVIKQDKSVGSYSDIKRMSDTVLGVPSQCIVSQNVRNAKPQYCANVCLKINMKLSGKNSVLREPLPLVSTAPTIIIGADVEHPRSGMGSRPSIASVVASLDRYSAKYVARVAAQKASSDIQLLPHMLRDLFLAYYQSTNRKPEHVIYYRDGVSEGQFYDILQTEMRALRKAFKMISDGYNPPVTFIIVNKRHHMRAFPANQRDADRKGNVVPGTVIDTGIVDSHRFDFFLYGHSGIQGTSVPCHYTVLHDENNMSAEDVQRLTYHLGYTFARCTRSVSFATPAYYAHLAAARARFFLN
>Ph_citrAGO2
KTVQLQVNYFGVSLDSAAEIFKYHVDVERKDEPMGDRLPRSLVRNVINAALRQYETEFGGIRVVHDGMSAMYAPAMLPWHAKTFVDVNPDGPSGPPTFVVKIKLAETISTSSLTDYYSNDVNVMPVLQALDVAARHLGAQRLITVGRNFFSMKKTFPLKGGKELCWGYHQAIRIADRKLLMNVDQAATVFYAPKELMELVLPALSVNDIRGLSDRDAKNLARALRKIEVVPTHRKDRKRAIFGISAQPANQTMVNIKGESMSVADYFSKRYNMNLRYPHLPLVNVGSKRKENWLPIELCEVAPGQRCANINDLDTAEIIRQTSQPPRARQETIIDQVRQAGFENDPYLAAFGMKVDQRLDTTDARVMDPPDVQYANVSERPSGGQWNLRDKRFVEGATLRNWGVVVTANVNERDVQGFVRNLVDMAGKSGLTIEDSNPYMIHIDQRGSQVEELMKMCHKELEARNRGPPQLIMVIKQDKSVGSYSDIKRMSDTVLGVPSQCIVSQNVRSAKPQYCANVCLKINMKLSGKNSILREPLPLVSSAPTIIIGADVEHPRSGMGSRPSIASVVASLDRYSAKYVARVAAQKASSDIQLLPHMLRDLFLGYYQSTNRKPEHVIYYRDGVSEGQFHDILQTEMRALRKAFKMISDGYNPPVTFIIVNKRHHMRAFPVNQRDADRKGNVVPGTVIDTGIVDSHRFDFFLYGHSGIQGTSVPCHYTVLHDENKMSAEDVQRLTYHLGYTFARCTRSVSFATPAYYAHLAAARARFYLN
>Ph_pluvAGO2
KSIQLQVNYFGVSLDGVAEIFKYHVDVERKDETMGDRLPRSLVRNVINAALRQYEAEFGGIRVVHDGMSAMYAPAMLPWDAKTFVDVNPDGPSGPRTFVVKIKLAETISTSSLTDYYSNDVNVMPVLQALDVAARHLGAQRLITVGRNFFSMKKTFPLKGGKELCWGYHQAIRIADRKLLMNVDQAATVFYAPKELMELVLPVLSANDIRALSERDGKNLARALRKIEVVPTHRKDRKRAIFGISAQPANQTMVNIKGENMSVADYFSKRYNVNLRYPQLPLVNVGSKRKENWLPIELCEVAPGQRCANINDMDTAEIIRQTSQPPRARQETILDQVRQAGFENDPYLAAFGMKVDQRLETTDARVMDPPDVQYANVSERPSGGQWNLRDKRFVEGATMRNWGVVITANVSERDVQGFVRNLVDMAGKSGLTIEDSNPHMIHMDQRGAQVEELMKICHKELQVRNNGPPQLIMVIKQDKSVGSYSDIKRMSDTVLGIPSQCIVSQHVRTAKPQYCANVCLKINMKLSGKNSILREPLPLVSTAPTIIIGADVEHPRSGMGSRPSIASVVASLDRYSAKYVARVAAQKASSDIQLLPHMLRDLFLAYYESTNRKPEHVIYYRDGVSEGRYYDILQTEMRALRKAFKMISDGYNPPVTFIIVNKRHHMRSFPANSRDADRKGNVVPGTVVDTGIVDSHRFDFFLYGHSGIQGTSVPCHYTVLHDENKMSAEDVQRLTYHLGYTFARCTRSVSFATPAYYAHLAAGRARFFLN
>Ph_agatAGO2
KSMQLQVNYFGISLDGASEIFKYHVDVERKDETMGDRLPRSLVRNVINAALRQYENDFGGIRVVHDGMSAMYAPTMLPWDGKTFVDINPDGPSGPRTFVVKFKLAETIAMNTLTDYYTNDVNVMPILQALDVAARHLGAQRLITVGRNFFSMKKTFPLKGGKELCWGYHQAVKVADRKLLMNMDQAATVFYAPKELMELVLPALSANDIRALNERDAKNLARALRKIEVVPTHRKDRKRAIFGISAQPANQTIVNIKGESMSIADYFSKRYNVNLRYPHLPLVNVGSKRKENWLPIELCEVAPGQRCANINDLDTAEIIRQTSQPPRARQETIIDQIRQAGFENDPYLAAFGMKVGQHLESTDARVMDPPDVQYANVSERPSGGQWNLRDKRFVEGATLRNWGVVITANVGERDVQGFVRTLVDMAGKSGLTIEDSSPHMVHMDQRGAQVEELMSMCFKELEARSRGPPQLIMVIKQDKSVGSYGDIKRMSDTVLGIPSQCIVSQNVRSAKPQYCANVCLKINMKLSGKNSILREALPLVSTAPTIIIGADVEHPRSGMGSRPSIASVVASLDRYSAKYVARVAAQKASSDIQLLPHMLRDLFLAYYQSTNRKPEHVIYYRDGVSEGQYYDILQTEMRALRKAFKMISEGYNPPVTFIIVNKRHHMRAFPANSRDGDRKGNVVPGTVIDTGIVDSHRFDFFLYGHSGIQGTSVPCHYTVLHDENKMSAEDVQRLTYHLGYTFARCTRSVSFATPAYYAHLAAGRARFFLN
>Hy_arabAGO2
KSVQLQVNYFGVSLESTAEIFKYHVDVERKTETPGERLPRSLVRNVINAALRQYEAEFGGVRVVHDGMSAMYVPSMLPWDAKTFADVNPDGPSGPRTFVVNIKLAETISTSSLTDYYSNDVNIMPVLQALDVAARHLGAQRLITVGRNFFSMKKTFPLKGGKELCWGYHQAIRVADRKLLMNVDQAATVFYAPKELMELVLPALSVNDVRSLSERDGKNLARALRKIEVVPTHRKDRKRAIFGISALPANETIVNIKGESMSIADYFGKRYNVNLRYPHLPLVNVGSKRKENWLPIELCEVAPGQRCANINELDTAEIIRQTSQPPRARQETIMNQVRQAGFENDPYLAAFGIKVEQRLETANARVMDPPDVQYANVSERPSGGQWNLRDKRFVDGATMRNWGVVVTANVGERDVQSFIRTLVDMAGKSGLTIEDSKPHTIHIDQRGAQVEELMKLCFQEMEARNKGPPQLIMVIKQDKSVGSYGDIKRMSDTVLGIPSQCIVSQNVRSAKPQYCANVCLKINMKLSGKNSILRESLPLVSDAPTIIIGADVEHPRSGMGSRPSIASVVASLDRYSAKYVARVAAQKASSGIQLLPHMLRDLFLAYYRSTSRKPEHVIYYRDGVSEGQYYAILQTEMRALRKAFKMISDDYNPPVTFIIVNKRHHMRAFPVNPREADRKGNVVPGTVIDSGIVDSHRFDFFLYGHSGIQGTSVPCHYTVLHDENKMSAEDVQRLTYHLGYTFARCTRSVSFATPAYYAHLAAGRARFFLN
>Pe_tabaAGO2
KSMQLQVNYF-------------------KNETMDNRLPRSLVRNVINAALRQYEVDFGGIRVVHDGMSAMYAPTMLSWDAKTFVDVNPDGPSGPRTFVVTMKLAETISTSTLTDYYTNDVNVMPVLQALDVAARHLGAQRLIAVGRNFFSMKKPFPLKGGKELCWGYHQAIRVADRKLLMNVDQAATVFYAPKELMEIVLSVLSANDIRSLQERDGKNLARALRKIEIVPTHRKDRKRAIFGISALPANQTIVKIKGESMSIADYFGKRYNVNLRYPHLPLVNVGSKRKENWLPIELCEVAPGQRCANINELDTAEIIRQTSQPPRARQERIVDQVRQAGFENDPYLAAFGIKVEQRLETTDARVMDPPDVQYANVSERPSGGQWNLRDKRFVEGAMMRNWGVVVAAKIGERDVQGFVRNLMDMAGKSGLTIEDSNPHMIHMDQRGAQVEELMKMCFQAMKDRNKGPPQLIMVIKQDKSIGSYGDIKRMSDTVLGIPSQCIVSQNVRSAKPQYCANVCLKINMKLSGKNSILREPLPLVSNAPTIIIGADVEHPRSGIGSRPSIASVVGSLDRYSAKYVARVAAQKASSDIQLLPHMLRDLFLAYYQSTSRKPEHVVYYRDGVSEGQYYDILQVEMRALRKAFKMISEDYNPPITFIIVNKRHHMRAFPVNQREADRKGNVIPGTVIDTGIVDSHRFDF--------SCTSVPCHYTVLHDENKMSAEDVQRLTYHLGYTFARCTRSVSFATPAYYAHLAAARARFFLN
>Ph_sojaAGO4
KTTQLNVNYFGISLDSAPEIFKYHVHVERKDESMGERLPRSLVRNVINAALRQYEAEFAGIRVVHDGMAALYAPTMLPWNAKDFPDIDPDGNGGPRTFVAKMKLVETISTSSLTDYYANDTNVMPVLQALDVVARHLGAQRLIAVGRNFFTMKKTHTLKGGKELCWGYHQAIRLADHKLLMNVDQAATVFYSPGPLMQLAMAALGPDEVRDLSERDMKSLARALRKIEVVPTHRKDRKRAIFGVSAQPANLTMVNIKGETMSVAAYFSGKYNMQLRYPNLPLVNVGSKRKENWLPIEVCEVAPGQRCANINDLDTAEIIRQTSQPPRNRQENIMEQVRQAGFENDPFLAAFGIKVDQRLESTEAHVIDAPDVQYQNVSERPAGGQWSLNSKRFVEGVPVRNWGVIVAANANEREVHNFIGKLTDLGDQRGLPFEDKNPVLIHQDQRGAQVEELMKMCHQELERRNAGPPQFLLVILPAKNSPVYGDVKRMSDTVLGLPSQCIASVNLPRANPQFCANVCLKINMKLKGKNAVLRDELPLISTAPTIIIGADVEHPRSGMGGRPSIAAVVASMDRYSAQYATRVAAQKASSDIQQLPNMLRELFLAYYENTQRKPEHVIYYRDGVSEGQMHDILQMEMRALRKAFKMISEDYNPPVTFVVVNKRHHLRAFAVNSRDADRKGNVMPGTVIDTGVVNPHRFDFFLYGHSGIQGTTVPAHYTVLHDENKMSAEDIQRLTYHLGYTFSRCTRSVSFVTPVYYAHLAAARARFFLN
>Ph_pisiAGO4
KTTQLNVNYFGISLDSAPEIFKYHVHVERKDESMGERLPRSLVRNVINAALRQYEAEFAGIRVVHDGMAALYAPTMLPWNAKDFPGIDPDGNGGPRTFVAKMKLVETISTSSLTDYYANDTNVMPVLQALDVVARHLGAQRLIAVGRNFFTMKKTHTLKGGKELCWGYHQAIRLADHKLLMNVDQAATVFYSPGPLMQLAMAALGPDEVRDLSERDMKSLARALRKIEVVPTHRKDRKRAIFGVSAQPANLTMMNIKGETMSVAAYFSGKYNMQLRYPNLPLVNVGSKRKENWLPIEVCEVSPGQRCANINDLDTAEIIRQTSQPPRNRQENIMEQVRQAGFENDPFLAAFGIKVDQRLESTEAHVIDAPDVQYQNVSERPAGGQWSLNSKRFVEGVPVRNWGVIVAANANEREVHNFIGKLTDLGDQRGLPFEDKNPVLIHQDQRGAQVEELMKMCHQELERRNAGPPQFLLVILPAKNSPVYGDVKRMSDTVLGLPSQCIASVNLPRANPQFCANVCLKINMKLKGKNAVLRDELPLISTAPTIIIGADVEHPRSGMGGRPSIAAVVASMDRYSAQYATRVAAQKASSDIQQLPNMLRELFLAYYENTQRKPEHVVYYRDGVSEGQMHDILQTEMRALRKAFKMISEDYNPPVTFVVVNKRHHLRAFAVNSRDADRKGNVMPGTVIDTGVVNPHRFDFFLYGHSGIQGTTVPAHYTVLHDENKMSAEDIQRLTYHLGYTFSRCTRSVSFVTPVYYAHLAAARARFFLN
>Ph_cinnAGO4
---------------------------------MGDRLPRSLVRNVINAALRQYEAEFGGIRVVHDGMAALYSPTMLPWNAKDFTDINPDGNGGPRTFVAKMKLVETISTSSLRDNYGNETNVMPVLQALDVVARHLGAQRLIAVGRNFFTMKKTHTLKGGKELCWGYHQAIRLADQKLLINIDQAATVFYSPGPLMQLAMAALGPDDVRDLSERDMKSLARALRKIEVVPTHRKDRKRAIFGVSAQPANLTMVSIKGENISVAAYFSGKYNMQLRHPHLPLVNVGSKRKENWLPIEVCEVAPGQRCANINDLDTAEIIRQTSQPPRNRQENIMEQVRQAGFENDPFLAAFGIKVDQRLESTEAHVIEAPDVQYQNVSERPAGGQWSLNSKRFVEGIPVRNWGVIVAANVNERDVHNFIGKLADLGDQRGLPFEEKNPALIHQDQRGAQVEELMKMCHQELERRNAGPPQFLLVILPAKNSPVYGDVKRMSDTVLGLPSQCIASVNLPRANPQFCANVCLKINMKLKGKNAVLREELPLISSAPTIIIGADVEHPRSGMGGRPSIAAVVASMDRYSAQYATRVAAQKASSDIQQLPNMLRELFLAYYENTLRKPEHVVYYRDGISEGQMFDILQTEMRALRKAFKMISEDYNPPVTFVVVNKRHHLRAFPVNSRDADRKGNVMPGTVIDTGVVNPHRFDFFLYGHSGIQGTTVPAHYTVLHDENKMSAEDIQRLTYHLGYTFSRCTRSVSFVTPVYYAHLAAARARFFLN
>Ph_fragAGO4
KTTQLNINYFGISLDSAPEIFKYHVNVERKDDSMGDRLPRSLVRNVINAALRQYETEFNGIRVVHDGMAALYSPAMLPWNAKDFADINPDSNGGPRTFIVKMKLVETISTSSLTDYYANDTNVMPVLQALDVVARHLGAQRLIAVGRNFFTMKKTHTLKGGKELCWGYHQAIRLADHKLLMNVDQAATVFYSPGPLMQLAMAALGPDEVRDLSERDMKSLARALRKIEVVPTHRKDRKRAIFGVSAQPASLTMVDIKGENMSVATYFSRKYNMQLRYPNLPLVNVGSKRKENWLPIEVCEVAPGQRCANINDLDTAEIIRQTSQPPRNRQENIMEQVRQAGFENDPFLAAFGIKVDQRLVSTEAHVIDAPDVQYHNVSERPAGGQWSLNSKRFVEGVPVRNWGVIVAANVNERDVRSFVTKLADLGDQRGLPFEEKNPMLIHQDQRGAQVEELMKMCHQELEHRNAGPPQFLLVILPAKNSPVYGDVKRMSDTVLGLPSQCIASQNLPRANPQFCANVCLKINMKLKGKNAVLRDELPLISSAPTIIIGADVEHPRSGMGGRPSIAAVVASMDRYSAQYAARVAAQKASSDIQQLPNMLRELFLAYYENTQRKPEHVVYYRDGVSEDQMFDILQTEMRALRKAFKMISDDYNPPVTFVVVNKRHHLRAFPVNARDADRKGNVMPGTVIDTGVVNPHRFDFFLYGHSGIQGTTVPAHYTVLHDENKMSAEDIQRLTYHLGYTFSRCTRSVSFVTPVYYAHLAAARARFFLN
>Ph_rubiAGO4
KTTQLNINYFGISLDSAPEIFKYHVNVERKDDSMGDRLPRSLVRNVINAALRQYETEFNGIRVVHDGMAALYSPAMLPWNAKDFADINPDSNGGPRTFIVKMKLVETISTSSLTDYYANDTNVMPVLQALDVVARHLGAQRLIAVGRNFFTMKKTHTLKGGKELCWGYHQAIRLADHKLLMNVDQAATVFYSPGPLMQLAMAALGPDEVRDLSERDMKSLARALRKIEVVPTHRKDRKRAIFGVSAQPASLTMVDIKGENMSVATYFSRKYNMQLRYPNLPLVNVGSKRKENWLPIEVCEVAPGQRCANINDLDTAEIIRQTSQPPRNRQENIMEQVRQAGFENDPFLAAFGIKVDQRLESTEAHVIDAPDVQYHNVSERPAGGQWSLNSKRFVEGVPVRNWGVIVAANVNERDVRSFVTKLADLGDQRGLPFEEKNPMLIHQDQRGAQVEELMKMCYQELERRNAGPPQFLLVILPAKNSPVYGDVKRMSDTVLGLPSQCIASQNLPRANPQFCANVCLKINMKLKGKNAVLRDELPLISSAPTIIIGADVEHPRSGMGGRPSIAAVVASMDRYSAQYAARVAAQKASSEIQQLPNMLRELLLAYYENTQRKPEHVVYYRDGVSEGQMFDILQTEMRALRKAFKMISDDYNPPVTFVVVNKRHHLRAFPVNPRDADRKGNVMPGTVIDTGVVNPHRFDFFLYGHSGIQGTTVPAHYTVLHDENKMSAEDIQRLTYHLGYTFSRCTRSVSFVTPVYYAHLAAARARFFLN
>Ph_meloAGO4
KTAQLNVNYFGISLDSAPEIFKYHVHVERKDESMGDRLPRSLVRNVINAALRQHEGEFAGIRVVHDGMAALYAPTMLPWNAKDFPGIDPDGNGGPRTFVVKMKLVETISTSSLKDYYANDTNVMPVLQALDVVARHLGAQRLIAVGRNFFTMKKTHTLKGGKELCWGYHQAIRLADHKLLMNVDQAATVFYSPGPLMQLAMAALGPDEVRDLSERDMRSLARALRKIEVVPTHRKDRKRAIFGVSAQPANLTMVSIKGETMSVAAYFSGKYNMQLRYPNLPLVNVGSKRKENWLPIEVCEVAPGQRCANINDLDTAEIIRQTSQPPRNRQENIMEQVRQAGFENDPFLAAFGIKVDQRLETTEAHVIEAPDVQYQNVSERPAGGQWSLNSKRFVEGVPVRNWGVIVAANANEREVHNFIGKLTDLGNQRGLPFEDKNPVLIHQDQRGAQVEELMKMCHQELERRNAGPPQFLLVILPAKNSPVYGDVKRMSDTVLGLPSQCIASVNLPRANPQFCANVCLKINMKLKGKNAVLRDELPLINTAPTIIIGADVEHPRSGMGGRPSIAAVVASMDRYSAQYATRVAAQKASSDIQQLPNMLRELFLAYYENTQRKPEHVVYYRDGVSEGQMHDILQTEMRALRKAFKMISDDYNPPVTFVVVNKRHHMRAFAVNSRDADRKGNVMPGTVIDTGVVNPHRFDFFLYGHSGIQGTTVPAHYTVLHDENKMSAEDIQRLTYHLGYTFSRCTRSVSFVTPVYYAHLAAARARFFLN
>Ph_agatAGO4
----------------------------------------------------------------------------------------------------------------------------------------------------------------------------------------------------------------------------------------------------------------------------------------------------------------------------------------------------------------------------------------------------------------------------------------------------------------------------------------MVILPAKNSPMYGDVKRMSDTVLGLPSQCIASQNLPRANDQFCANICLKINMKLKGKNAVLGDNLPLLSSAPTIIIGADVEHPRPGMGGRPSIAAVVASMDRYSAQYAARVAAQKASSDIQQLPNMLRELFLAYYENTKRKPEHVIYYRDGVSEGQMFDILQTEMRALRKAFKMISEEYNPPVTFVVVNKRHHLRAFAVNSRDADRKGNVMPGTVIDTGVVNPHRFDFFLYGHSGIQGTTVPAHYTVLHDENKMSADDIQCLTYHLGYTFSRCTRSVSFVTPVYYAHLAAARARFYLN
>Ph_infeAGO5
---------------------------------MGDRLPRSLVRNVINAALRQYESEFGGLRVVHDGMAALYSPALLPWHAKDFTDVNPDGPSGPRTFLVKMKLVETISTSSLKEHYSNDVNVMPILQALDVVARHLGAQRLIAVGRNFFTMKKTHTLKGGKELCWGYHQALRLADHKLLMNVDQAATVFYSPGPLMQLAVAALGPEDVRDLAERDMKSLARALRKIEVVPTHRKDRKRAIYGVSAQPANMTMVSIKGENMSVAAYFSGKYNMQLRYPNLPLVNVGSKRKENWLPIEVCEVAPGQRCANINDLDTAEIIRQTSQPPRSRQENILEQIRQAGFENDPFLAAFGIKVDQRLQPTEARVMDAPDVQYQNVSERPYGGQWSLNGKKFVEGVPVRNWGVIVAANVSERDAQNFVGKLTDLGDQRGLPFDDKRPVLIHQDQSGAQVEELMKMCHQELERRNLGPPQFLLVILPAKNSPVYGDVKRMSDTVLGLPSQCIASQNLPRANPQFCANVCLKINMKLNGKNAVLRDPLPLISSEPTIIIGADVEHPRSGMGGRPSIAAVVASMDRYSAQYAARVAAQKASSDIQQLPNMLRELFLAYYENTKRKPERVVYYRDGVSQGQMFDILQTEMRALRKAFKMISEDYNPPVTFVVVNKRHHLRAFAVNSRDADRKGNVMPGTVIDTGVVNPHRFDFFLYGHSGIQGTTVPGHYTVLHDENKMSAEDIQRLTYHLGYTFSRCTRSVSFVTPVYYAHLAAARARFYLN
>Ph_paraAGO4
KTTQLNVNYFGVSLDSASEIFKYHVTVERKDESMGDRLPRSLVRNVINAALRQYESEFGGLRVVHDGMAALYSPALLPWHAKDFTDVNPDGPSGPRTFVVKMKLVETISTSSLKDHYSNDVNVMPVLQALDVVARHLGAQRLIAVGRNFFTMKKTHTLKGGKELCWGYHQALRLADNKLLMNVDQAATVFYSPGPLMQLAVAALGPEDVRDLTERDMKSLARALRKIEVVPTHRKDRKRAIFGVSAQPANMTMVNIKGENMSVAAYFSGKYNMQLRYPNLPLVNVGSKRKENWLPIEVCEVAPGQRCANINDLDTAEIIRQTSQPPRNRQENIIEQIRQAGFENDPFLAAFGIKVDQRLQPAEARVMDAPDVQYQNVSERPYGGQWSLNGKKFVEGVPVRNWGVIVAANVSERVAQNFVSKLTDLGDQRGLPFEDKRPVLIHQDQRGAQVEELMKMCHQELERRSLGPPQFLLVILPAKNSPVYGDVKRMSDTVLGLPSQCIASQNLPRANPQFCANVCLKINMKLNGKNAILRDPLPLISSEPTIIIGADVEHPRSGMGGRPSIAAVVASMDRYSAQYAARVAAQKASSDIQQLPNMLRELFLAYYENTKRKPERVVYYRDGVSEGQMFDILQTEMRALRKAFKMISEDYNPPVTFVVVNKRHHLRAFTVNPRDADRKGNVMPGTVIDTSIANPHRFDFFLYGHSGIQGTTVPGHYTVLHDENKMSAEDIQRLTYHLGYTFSRCTRSVSFVTPVYYAHLAAARARFYLN
>Ph_cactAGO4
KTTQLNVNYFGVSLDSTPEIFKYHVTVERKDESMSDRLPRSLVRNVINAALRQYESEFGGLRVVHDGMAALYAPAMLPWNAKDFTDVNPDGPSGPRTFLVKMKLVETISTSSLTEYYSNDVNVMPVLQALDVVARHLGAQRLIAVGRNFFTMKKTHTLKGGKELCWGYHQALRLADHKLLMNVDQAATVFYSPGPLMQLAVAALGPEDARDLTERDMKSLARALRKIEVVPTHRKDRKRAIFGVSAQPANMTMVDIKGESMSVAAYFSGKYNMQLRYPNLPLVNVGSKRKENWLPIEVCEVAPGQRCANINELDTAEIIRQTSQPPRNRQENIMEQIRQAGFENDPFLAAFGIKVDQRLQPTEARVMDAPDVQYQNVSDRPYGGQWSLNGKKFVEGVSVRNWGMIVAANVSERDAQNFVSKLSDLGDQRGLPFEDKRPVLIHQDQRGAQVEELMKMCHQELERRNLGPPQFLLVILPAKNSPVYGDVKRMSDTVLGLPSQCIASQNLPRANPQFCANVCLKINMKLNGKNAVLRDPLPLISSEPAIIIGADVDHPRSGMGGRPSIAAVVASMDRYSAQYAARVAAQKASSDIQQLPNMLRELFLAYYDNTKRKPERVVYYRDGVSEGQMFDILQTEMRALRKAFKMISDDYNPPVTFVVVNKRHHLRAFTVNPRDADRKGNVMPGTVIDTGVVNPHRFDFFLYGHSGIQGTTVPAHYTVLHDENKMSAEDIQRLTYHLGYTFSRCTRSVSFVTPVYYAHLAAARARFFLN
>Ph_idaeAGO4
KTAQLNVNYFGVSLDSTPEIFKYHVTVERKDESMGDRLPRSLVRNVINAALRQYESEFGGLRVVHDGMAALYAPAMLPWNAKDFTDVNPDGPSGPRTFLVKMKLVETISTSSLTEYYSNDVNVMPVLQALDVVARHLGAQRLIAVGRNFFTMKKTHTLKGGKELCWGYHQALRLADHKLLMNVDQAATVFYSPGPLMQLAVAALGPEDARDLTERDMKSLARALRKIEVVPTHRKDRKRAIFGVSAQPANMTMVDIKGESMSVAAYFSGKYNMQLRYPNLPLVNVGSKRKENWLPIEVCEVAPGQRCANINELDTAEIIRQTSQPPRNRQENIMEQIRQAGFENDPFLAAFGIKVDQRLQPTEARVMDAPDVQYQNVSDRPYGGQWSLNGKKFVEGVSVRNWGVIVAANVSERDAQNFVSKLSDLGDQRGLPFEDKRPVLIHQDQRGAQVEELMKMCHQELERRNLGPPQFLLVILPAKNSPVYGDVKRMSDTVLGLPSQCIASQNLPRANPQFCANVCLKINMKLNGKNAVLRDPLPLISSEPTIIIGADVDHPRSGMGGRPSIAAVVASMDRYSAQYAARVAAQKASSDIQQLPNMLRELFLAYYDNTKRKPE-----R-----GQMFDILQTEMRALRKAFKMISDDYNPPVTFVVVNKRHHLRAFTVNPCDADRKGNVMPGTVIDTGVVNPHRFDFFLYGHSGIQGTTVPAHYTVLHDENKMSAKDIQQLTYHLGYTFSRCTRSVSFVTPVYYAHLAAARARFFLN
>Ph_ramoAGO4
KTMQLNVNYFGISLAAAAEIFKYHVTVERKDESMGDRLPRTLVRNVINAALHQYEGEFGGLRVVHDGMTALYSPAMLPWTARDFADVNPDGPSGPRTFVVKMKLVETISTSSLEDYYSNEVNVMPVLQALDVVARHLGAQRLIAVGRNFFTMKKTHSLKGGKELCWGYHQAIRLADHKLLMNVDQAATVFYAPGPLMQLAMAALGPDEVRDLSERDMKSLARALRKIEVVPTHRKDRKRAIFGVSAKPADRTIVSIKGEDMSVAAYFIAKYNMKLRYPDLPLVNVGSKRKENWLPIEVCEVAPGQRCANINDLDTAEIIRQTSQPPRNRKENIMEQIRQAGFENDPFLAAFGVKVDQRLESTEARVMEAPEVQYQNVSERPAGGQWSLNAKKFVEGVPVRNWGVIVAANTSERDVRNFVGKLTDLGDQRGLPFEDKNPVLIHQDQRGAQVEELMKMCHQELERRNMGPPQILMVILPAKNSPVYGDVKRMSDTVLGLPSQCIASVNLPRANPQFCANVCLKINMKLKGKNAVLRDSLPLVSTAPTIIIGADVEHPRSGMGGRPSIAAVVASMDRYSAQYAARVAAQKASSDIQQLPSMLRELFLAYYDNTKRKPEHVIYYRDGVSEGQMFDILQTEMRALRKAFKMISEDYNPPVTFVVVNKRHHLRAFPVNQRDADRKGNVMPGTVIDTGVVNPHRFDFFLYGHSGIQGTTVPGHYTVLHDENNMSAEDIQRLTYHLGYTFSRCTRSVSFVTPVYYAHLAAARARFYLN
>Ph_piniAGO4
------------------------------------------------------------------------------------------------------------------------------------------------------------------------------------------------------------------------------------------------------------MVDIKGETMSVAAYFSGKYKLQLRYPNLPLVNVGSKRKENWLPIEVCEVAPGQRCANINDLDTAEIIRQTSQPPRIRQENIMEQVRQAGFENDPFLSAFGIKVEQRLESTEARVMDAPDVQYQNVSERPFGGQWSLNGKKFVEGVPVRNWGVIVVANVSDRDVRGFVGKLTDLGDQRGLPFEDKSPVLLHQDQRGAQVEELMKMCHQELERRNMGPPQLIMVVLPAKNSPLYGDVKRMSDTVLGLPSQCIASQNLPRANLQFCANVCLKINMKLNGKNAVLRDPLPLIGTAPTIIIGADVEHPRSGMGGRPSIAAVVASMDRYSAQYATRVAAQKASSDIQQLPSMLRELFLAYYENTKRKPEHVIYYRDGVSEGQMFDILQTEMRALRKAFKMISEDYNPPVTFVVVNKRHHLRAFAANPRDADRKGNVMPGTVIDTGVVNPHQFDFFLYGHSGIQGTTVPAHYTVLHDENNVSAEDIQRLTYHLGYTFSRCTRSVSFVTPVYYAHLAAARARFFLS
>Ph_citrAGO4
KTVQLNVNYFGISLDSSGEIFKYHVTVERKDESMGDRLPRSLVRSVINAALRQYESEFGGLRVVHDGMAALYAPAMLPWNAKDFPDINPDGPSGPRAFLVKMKLVETISTSSLKDYYSNDVNVMPVLQALDVVARHLGAQRLIAVGRNFFTMKKTHTLKGGKELCWGYHQAIRLADHKLLMNVDQAATVFYSPGPLMQLVVAAVGPEDIRDLSERDMKSLARALRKIEVVPTHRKDRKRAIFGVSAQPANLTMVSIKGETMSVAAYFSGKYNMQLRYPNLPLMNVGSKRKENWLPIEVCEVAPGQRCANINDLDTAEIIRQTSQPPRNRQENIIEQIRQTGFENDPFLAAFGVKVDQRLESTDASVMEAPHVQYQNVSERPFGGQWSLNGKKFVEGVPVRNWGVVVAANVSERDAFGFVSKLSDLGDQRGLSFEDKNPVLIHRDKRGAQVEELMRTCYQEMERRN-GPPQFILVILPAKNSPMYGDVKRMSDTVLGLPSQCIASQNLPRANPQFCANVCLKINMKLNGKNAVLRDPLPLISTEPTIIIGADVEHPRSGMGGRPSIAAVVASMDRYSAQYACRVAAQKAASDIQQLPNMLRELFLAYYANTKRKPERVIYYRDGVSEGQMYDILQTEMRALRKAFKMISEEYNPPVTFIVVNKRHHLRAFAANSRDADRKGNVMPGTVIDTGVVDPHRFDFFLYGHSGIQGTTVPGHYTVLHDENKMAAEDIHRLTYHLGYTFSRCTRSVSFVTPVYYAHLAAARARFYLN
>Ph_lateAGO4
KTMQLNVNYFGISIAAAGEIFKYHVTVERKDESMGDRLPRTLVRNVINAALRQYEGEFGGLRVVHDGMSALYSPVMLPWTAKDFADVNPDGPSGPRTFVVKMKLVETISTFSLKDYYSNEVNVMPVLQALDVVARHLGAQRLIAVGRNFFTMKKTHSLKGGKELCWGYHQAIRLADHKLLMNIDQAATVFYSPGPLMQLAMAALGPDEVHDLSERDVKSLARALRKIEVVPTHRKDRKRAIFGVSAKPADRTIVSIKGEDVSVAAYFSAKYNMKLRYPDLPLVNVGSKRKENWLPIEVCEVAPGQRCANINDLDTAEIIRQTSQPPRNRKDNIMEQIRQAGFENDPFLAAFGVKVDQRLESTEARVMEAPEVQYQNVSERPAGGQWSLNAKKFVEGVPVRNWGVIVAANASERDVRNFVEKLTGLGDQRGLPFEDKNPVLIHQDQRGAQVEELMKMCHQELERRNMGPPQILMVILPAKNSPVYGDVKRMSDTVLGLPSQCIASVNLPRANPQFCANVCLKINMKLKGKNAVLRDPLPLVSTAPTIIIGADVEHPRSGIGGRPSIAAVVASMDRYSAQYAARVAAQKASSDIQQLPSMLRELFLAYYDNTKRKPEHVIYYRDGVSEGQMFDILQTEMRALRKAFKMISEDYNPPVTFVVVNKRHHLRAFPVNQREADRKGNVMPGTVIDTGVVNPHRFDFFLYGHSGIQGTTVPGHYTVLHDENNMLAEDIQRLTYHLGYTFSRCTRSVSFVTPVYYAHLAAARARFYLN
>Ph_capsAGO4
SLELLNVNYFGISLDSSGEIFKYHVTVERKDESMGDRLPRSLVRSVINAALRQYESEFGGLRVVHDGMAALYSPSMLPWNAKVFSDINPDGPSGPRTFLVKMKLVETISTSSLKDYYSNDVNVMPVLQALDVVARHLGAQRLIAVGRNFFTMKKTHTLKGGKELCWGYHQAIRLADNKLLMNVDQAATVFYSPGPLMQLVVAALGPEDVRDLSERDMKSLARALRKIEVVPTHRKDRKRAIFGISAQPANLTMVSIKGETMSVAAYFSGKYNMQLRHPNLPLVNVGSKRKENWLPIEVCEVAPGQRCANINDMDTAEIIRQTSQPPRNRQENILEQIRQAGFENDPFLAAFGVKVEQRLESTDASVMEAPHVQYQNVSERPYGGQWSLNGKKFVEGVPVRNWGVVVAANVSERDAFGFVNKLSDLGDQRGLPFEDKKPVLIHQDQRGAQVEELMRTCYQEMERRN-GPPQFILVILPAKNSPVYGDVKRMSDTVLGLPSQCIASQNLPRANPQFCANVCLKINMKLNGKNAVLRDPLPLISTEPTIIIGADVEHPRPGMGGRPSIAAVVASMDRYSAQYACRVAAQKAASDIQQLPNMLRELFLAYYANTKRKPERVIYYRDGVSEGQMFDILQTEMRALRKAFKMISDEYNPPVTFIVVNKRHHLRAFATNQRDADRKGNVMPGTVIDTGVVDPHRFDFFLYGHSGIQGTTVPGHYTVLHDENKMTAEDIQRLTYHLGYTFSRCTRSVSFVTPVYYAHLAAARARFYLN
>Ph_multAGO4
-----------------GEIFKYHVTVERKDESIGDRLPRSLVRSVINTALRQYESEFGGLRVVHDGMAALYAPAMLPWNAKDFPDINPDGPSGPRTFLVKMKLVETISTSSLKDYYSNDVNVMPVLQALDVVARHLGAQRLIAVGRNFFTMKKTHTLKGGKELCWGYHQAIRLADHKLLMNVDQAATVFYSPGPLMQLVVNALGPEEIRDLSERDMKSLARALRKIEVVPTHRKDRKRAIFGVSAQPANLTMVSIKGETMSVAAYFSGKYNMQLRYPNLPLVNVGSKRKENWLPIEVCEVAPGQRCANINDLDTAEIIRQTSQPPRNRQENILEQIRQAGFENDPFLAAFGVKVDQRLESTDASVMEAPHVQYQNVSERPFGGQWSLNGKKFVEGVPVRNWGVVVAANVSERDAFGFVGKLSDLGDQRGLPFQEKKPVLIHQDQRGAQVEELMRTCYQEMQRRN-GSPQFILVILPSKNSPVYGDVKRMSDTVLGLPSQCIASQNLPRANPQFCANVCLKINMKLNGKNAVLRDPLPLISTEPTIIIGADVEHPRSGMGGRPSIAAVVASMDRYSAQYACRVAAQKASSDIQQLPNMLRELFLAYYANTKRKPERVIYYRDGVSEGQMYDILQTEMRALRKAFKMISQEYNPPVTFIVVNKRHHLRAFAANQRDADRKGNVVPGTVIDTGVVDPHRFDFFLYGHSGIQGTTVPGHYTVLHDENKMTAEDIHRLTYHLGYTFSRCTRSVSFVTPVYYAHLAAARARFYLN
>Ph_kernAGO4
RTVQLNVNYFGVSLASAVEIFKYHVAVERKDENMGDRLPRSLVRNIINAALRQYEGEFGGVRVVHDGMAALYSPTMLPWNSKDFTDVNPDSTNGPRTFVVKMKLVETISTASLKEYYTNDVNVMPVLQALDVVARHLGAQRLIAVGRNFFTMKKTHTLKGGKELAWGYHQALRLGDQKLFMNVDQAATVFYSPGPLMQLAVAALGPDEVRNLAERDMKSLARGLRKIEVVPTHRKDHKRAIFGVSAQPADQTMVDIKGETMSVAAYFSRKYNMQLRYPNLPLVNVGSKRKENWLPIELCEVAPGQRCANINDLDTAEIIRQTSQPPKTRQENIMGQIRQAGFENDPFLAAFGMKLEQHLEATEARVMDAPDVQYQNVSERPAGGQWSLNGKKFVEGVPLRNWGVIIVSNSSEREVSNFIQKLCDLGSQRGLPFEDRNPVVIHQDQRGAQVEELMRMCFQELERRNKGPPQLLMVILPDKRSSSYGDVKRMSDTVLGLPSQCIASANLPRANPQFCANVCLKINMKLNGKNAVLRDSLPLISTSPTIIIGADVEHPRSGQGSRPSIAAVVASMDRYSAQYATRVAAQKTSSDIQQLPHMLRELFLAYYENTKRKPEHVVYYRDGVSEGQMFDILQTEMRALRKAFKMISEDYNPPVTFIVVNKRHHLRAFAVNQRDADRKGNVMPGTVIDTGVVNPHRFDFFLYGHSGIQGTTVPAHYTVLHDENQMSAEDVQRLTYHLGYTFSRCTRSVSFVTPVYYAHLASARARFFLN
>Ph_sojaAGO3
KTMNMNVNYFGISLDAAPEIFKYHVDVAHEDESM--RLPRGLIRNVINAALRQYEAEFGGVRVVHDGMSALYSPTKLEWNSRVFPNVNPDAPTGPRTFVVKMKLAETIAVGSLEVHYANDTNVMPVLQALDVVARHLGAQRLIAVGRNFFGMKKTHELKGGKELCWGYHQAIRVSEKKLLMNVDQAATVFYEPCELMKLAMSALSPMAVRDLTERDMKNLARALRKVEVMPKHRKDRKRAIFGVSPDRADRTMVDIKGETMSVAEYFSRKYNLRLQHPSLPLVNVGSKKRENWLPIELCDVAPGQHCPNINDLDTAEIIRQTSQPPHARRENILSQVHQAGFENDPYLAAFGMKVGQQLERTDVRVLDPPDVQYANVSERPSGGQWNLKDKKFVTGAVLRNWGVVVDANTNEREVKNFIGTMVDTACKCGLMMECRNPLVIDRCGQRGEVEDLMKACYRQLECQGNGPPQLIMVIKQDKGSVSYGRIKRTSDTVLGIPSQCIVATNLRRANPQLCANVCLKMNMKLSGKNSVLREPLPLVSSCPTIVIGADVEHPRSGMGSRPSIASVVASMDAYSAKYIGRVAAQKAANDIQQLPHMLRDLFLSFYRSTDRRPERVIYYRDGVSEGRFYDILQSEMRALRKTFKMLSDDYNPPVTFVVVNKRHHMRVFPVNQSDADKKGNVVPGTVLDTGVVSPHRFDFFLYGHSGIQGTSVPCHYTVLHDENRLSADDLQRLTYYLGYTFSRCTRSVSFATPAYYAHLAAGRARFFLY
>Ph_pisiAGO3
KTMNMNVNYFGISLDAAPEIFKYHVDVAHEDESM--RLPRGLIRNVINAALRQYEAEFGGVRVVHDGMSALYSPTKLEWNSRVFPNVNPDARTGPHTFVVKMKLAETIAVGSLEAHYANDTNVMPVLQALDVVARHLGAQRLIAVGRNFFGMKKTHELKGGKELCWGYHQAIRVSEKKLLMNVDQAATVFYEPCELMKLAMSALSPMAVRDLTERDMKNLARALRKVEVMPKHRTDRKRAIFGVSPDRADRTMVDIKGETMSVAEYFSRKYNLRLQHPNLPLVNVGSKKRENWLPIELCDVAPGQRCPNINDLDTAEIIRQTSQPPHARRENILSQVHQAGFENDPYLAAFGMKVGQQLERTDVRVLDPPDVQYANVSERPSGGQWNLKDKKFVTGAVLRNWGVVVDANTNEREVKNFIGTMVDTACKCGLMIECRNPLVIDRCGQRGEVEDLMKACYRQLECQGNGPPQLIMVIKQDKGSVSYGRIKRTSDTVLGIPSQCIVATNLRRANPQLCANVCLKMNMKLSGKNSVLREPLPLVSSCPTIVIGADVEHPRSGMGSRPSIASVVASMDAYSAKYIGRVAAQKAANDIQQLPHMLRDLFLSFYRSTDRRPERVIYYRDGVSEGRFYDILQSEMRALRKTFKMLSDDYNPPVTFVVVNKRHHMRAFSVSQSDADKKGNVVPGTVLDTGVVSPHRFDFFLYGHSGIQGTSVPCHYTVLHDENRLSADDLQRLTYYLGYTFSRCTRSVSFATPACYAHLAAGRARFFLY
>Ph_niedAGO3
KMMNMNVNYFGISLDAASEIFKYHVDVAHEDESM--RLPRGLVRNVINAALRQYEAEFGGVRVVHDGMSALYSPTKLEWNSRDFPNVNPDAPAGPRTFVVKMKLAETIAVGSLEAHYANDTNVMPVLQALDVVARHLGAQRLIAVGRNFFGMKKTHELKGGKELCWGYHQAIRVSEKKLLMNVDQAATVFYEPCELMKLAMSALSPMAVRDLTERDMKNLARALRKVEVMPKHRKDRKRAIFGVSPDRADRTMVDIKGETMSVAEYFSRKYNLRLQHPNLPLVNVGSKKRENWLPIELCDVAPGQRCPNINDLDTAEIIRQTSQPPHARRENILTQVHQAGFENDPYLAAFGMKVGQQLERTDVRVLDPPDVQYANVSERPSGGQWNLKDKKFVTGAVLRNWGVVVDANTNEREVKNFIGTMVDTAGKCGLVMECRNPLVIDRCGQRGEVEDLMKACYRQLECQGNGPPQLIMVIKQDKGSVSYGRIKRTSDTVLGIPSQCIVATNLRRAIPQLCANVCLKMNMKLSGKNSVLREPLPLVSSCPTIVIGADVEHPRSGMGSRPSIASVVASMDAYSAKYIGRVAAQKAANDIQQLPHMLRDLFLSFYRSTDRRPERVIYYRDGVSEGRFYDILQSEMRALRKTFKMLSDDYNPPVTFVVVNKRHHMRAFPVNQSDADKKGNVVPGTVLDTGVVSPHRFDFFLYGHSGIQGTSVPCHYTVLHDENRLSADELQRLTYYLGYTFSRCTRSVSFATPAYYAHLAAGRARFFLY
>Ph_cinnAGO3
KRMNMNVNYFSISLDAAPEIFKYHVD----------RLPRALVRNVINAALRQYESEFCGIRVVHDGMSALYSPTKFEWNSRDFLSVNPDAPTGPRSFIVKMKLAETISVGSLEAHYNSDENVMPVLQSLDVVARHLGAQRLISVGRNFFGMKKTHELKGGKELCWGYHQAIRVAEKKLLMNVDQAATVFYEPCELMKLAISALSPTAVRDLSERDMKNLARALSKVEVMPMHRKDRKRAIFGVSPDRADRTMVDIKGEAMSVAEYFSRRYNLRLRHPNLPLVNVGSKKRENWLPIELCDVAPGQRCPNINDLDTAEIIRKTSQPPSVRRETILTQIRQAGFENDPYLAAFGMKVGQQLEKTDVRVLDAPDVQYANVSERPSGGQWNLKDKRFVTGAVLRNWGVVVDANADAREVNNFIGTMVDTAGKCGLVMECRNPLVIDRSGQRGEVEDLMKTCYRELENRGNGPPQLIMVIKQDKGSVSYGRIKRTSDTILGIPSQCIVATNLRRANPQLCGNVCLKMNMKLSGKNSVLREPLPLVSSCPTIVIGADVEHPRSGMGSRPSIASVVASMDAYSAKYIGRVAAQKAANDIQQLPHMLRDLFLSFYRSTDRRPERVIYYRDGVSEGRFYDILQSEMRALRRTFKMLSDDYNPPVTFVVVNKRHHMRAFPVGPGDVDKKGNVVPGTVLDTGVVSPHRFDFFLYGHSGIQGTSVPCHYTVLHDENKLSADDLQRLTYHLGYTFARCTRSVSFATPAYYAHLAAGRARFFLY
>Ph_agatAGO3
-------------------------------------------------------------------------------------------------------------------------------------------------------------------------------------------------------------------------------------------------------------------------------------------------------------------------------------------------------------------------------------------------------------------------------------------------------------------------------------------------------------------------------------------------------------------------------------------MDAYSAKYIGRITVQKASSDIQQLLNMLRDLFLAFYQSTDRRPERVLYYRDGVSEGRFFDILQTEMRALRKTFKMLSDDYNPPVTFVVVNKRHHMRVFPVNSRDADRKGNVVPGTVIDTGVVSPHKFDFFLYGHSGIQGTSVPCHYTVLHDENKLSADDLQRLTYHLGYTYSRCTRSVSFATPAYYAHLAAGRARFFLY
>Ph_fragAGO3
RTMSMNVNYFSVSLDKAPEIFKYHVDVVHEDENT--RLPRSIVRNVINAALRQYEAAFEGFHVVHDGMSALYSPSKLEWNSRDFPNVNPDGPAGPRTFIVKMKLAEAIAVSSLQAHYDNDENVMPVLQSLDVVARHLGAQRLVSIGRNFFGMKKTHELKGGKELCWGYHQAIRVAEKKLLMNVDQAATVFYEPCELMKLAMSALSPMAVRDLCERDMKNLARVLRKVEVVPTHRKDRKRAIFGVSPDRADRTMVDIKGETMSVAEYFYRKYNLRLQHPNLPLVNVGSKKRENWLPIELCDVAPGQRCPNINDLDTVEIIRQTSQPPSARRENILTQVRQAGFENDPFLDAFGMQVGQQLERTDVRVLDPPDVQYANVSERPTGGQWNLRDKKFVTGAVLRIWGVVVDANVDGREVGNFIGTMVETAGKCGLVMECRNPLVIDRSGQRGEVEDLMKTCYRELEARGDSPPQLIMVIKQDKGSVSYGRIKRTSDTVLGIPSQCIVASNLRRANLQLCANVCLKMNMKLSGKNSVLREPLPLVSSCPTIVIGADVEHPRSGMGSRPSIASVVASMDAYSAKYIGRVAVQKAANDIQQLPHMLRDLFLSFYRSTDRRPERVVYYRDGLSEGRFYDVLQTEMRALRKTFKMLSDDYNPPVTFVVVNKRHHMRAFPVNAGDADKKGNVVPGTVIDTGVVSPHRFDFFLYGHSGIQGTSVPCHYTVLHDENGMSADDLQRLTYHLGYTFSRCTRSVSFATPAYYA----GRARFFLY
>Ph_rubiAGO3
RTMSMNVNYFSVSLDKAPEIFKYHVDVVHEDEST--RLPRSIVRNVINAALRQYEAAFEGFHVVHDGMSALYSPSKLEWNSRDFPNVNPDGPAGPRTFIVKMKLAEAIAVSSLQAHYDNDENVMPVLQSLDVVARHLGAQRLVSIGRNFFGMKKTHELKGGKELCWGYHQAIRVAEKKLLMNVDQAATVFYEPCELMKLAMSALSPMAVRDLCERDMKNLARVLRKVEVVPTHRKDRKRAIFGVSPDRADRTMVDIKGETMSVAEYFYRKYNLRLQHPNLPLVNVGSKKRENWLPIELCDVAPGQRCPNINDLDTAEIIRQTSQPPSARRENILTQVRQAGFENDPFLNAFGMQVGQQLERTDVRVLDPPDVQYANVSERPTGGQWNLRDKKFVTGAVLRNWGVVVDANVDGREVGNFIGTMVETAGKCGLVMECRNPLVIDRSGQRGEVEDLMKTCYRELEARGDSPPQLIMVIKQDKGSVSYGRIKRTSDTVLGIPSQCIVASNLRRANLQLCANVCLKMNMKLSGKNSVLREPLPLVSSCPTIVIGADVEHPRSGMGSRPSIASVVASMDAYSAKYIGRVAVQKAANDIQQLPHMLRDLFLSFYRSTDRRPERVVYYRDGLSEGRFYDVLQTEMRALRKTFKMLSDDYNPPVTFVVVNKRHHMRAFPVNAGDADKKGNVVPGTVIDTGVVSPHRFDFFLYGHSGIQGTSVPCHYTVLHDENGMSADELQRLTYHLGYTFSRCTRSVSFATPAYYAHLAAGRARFFLY
>Ph_meloAGO3
KKMNVDVNYFGISLDAVSEIFKYHVDVAREDESM--RLPRGLVRDVINAALRQYETEFRGVRVVHDGMSALFSPLKLEWNSRDFPNVNPGAPTGPRTFVVKIKLAETITTSSLKDHYSNDVNVMPVLQSLDVVARHLGAQRLISVGRNFFGMKKTHELKGGKELCWGYHQAIRVSEKKLLMNVDQAATVFYEPCELMKLAMAALSPMAVRDLSERDMRNLARALRKVEVVPKHRKDRKRAIFGVSPDRADRTMVDIKGETMSVAEYFWRKYNLRLQHPNLPLVNVGSKKRENWLPIELCDVAPGQRCPNINDLDTAEIIRQTSQPPHVRRENILNQVRQAGFENDPYLATFGMKVGQQLEKTDVRVLDPPDVQYANVSERPSGGQWNLKDKKFVTGAVLRNWGVVVDANTNDREVKIFIGTMVDTAGKCGLVMECRNPLVIDRCGQR-EVEDLMKACYRQLEDQGNGPPQLIMVIKQDKGSVSYGRIKRTSDTVLGIPSQCIVATNLRRANPQLCANVCLKMNMKLSGKNSVLREPLPLVSSCPTIVIGADVDHPRSGMGSRPSIASVVASMDAYSAKYIGRVAAQKAANDIQQLPHMLRDLFLSFYRSTDRRPERVVYYRDGVSEGRFYDILQSEMRALRKTFKMLSDDYNPPVTFVVVNKRHHMRAFPVNQSDADKKGNVVPGTVLDRGVVSPHRFDFFLYGHSGIQGTSVPCHYTVLHDENRVSADDLQRLTYYLGYTFSRCTRSVSFATPAYYAHLAAGRARFFLY
>Ph_infeAGO4
RTMKMNVNYFSISLDKAVEVFKYHVDVVRPDEII--RLPRALVRNVINAALTQYKAELGGVRVVHDGMSALFAPQKFEWNARDFPDVNPDRPSGPPTFIVKVKLAETIALQSVEEHYRNDENVMPVLQALDIVARHLGAQRLVSVGRNFFAMKKTHELKGGKELCWGYHQAIRVAEKKLLLNIDQAASVFYQPCELMKLATSALSPADAHGLSERDMRSLARALRKVEVYPTHRKDRKRAIFGVSPDRADRTLVDIKGETMSVADYFYKKYNMRLRYPNLPLVNVGSRKREKWLPIELCEVAPGQRCPNINDLDTAEIIRQTSQPPHQRRETILGQIRQAGFENDPYLAAFGLEVDQQLETAEARVLDPPDVQYANVSERPSGGQWNLRDKKFVHGAVLRNWGVVVDANVSPRDVNNFIGILVDTASKCGLSVECRSPPVIDRSSKRVEVEDLMKFCFQELETRGNGAPQLILVIKQDKGSVSYGRIKRMSDTVLGIPSQCIVATNLRKANPQVCANVCLKMNMKLSGKNSVLREPLPLISTCPTIVIGADVEHPRSGMGSRPSIASVVASMDAYSAKYIGRVAAQKAANDIQQLPHMLRDLFLAFYQSTNRQPERVIYYRDGVSEGRFYDILQTEMRALRKTFKMLSDDYNPPVTFVVVNKRHHMRAFRINPRDADRKGNVVPGTVLDTDVVSPHRFDFFLYGHSAIQGTSVPCHYTVLHDENRMTADELQRLTYHLGYTFVRCTRSVSFATPAYYAHLAAGRARFFLY
>Ph_cactAGO3
RVMKMNVNYFSISLDQAVEVFKYHVDVERPDE----RLPRELVRRVINAALHQYEAELGGIRVVHDGMSALYSPQKFAWNARDFPDVNPDGTSGPPTFIVKVKLAEAIALQSVEEHYRNDENVMPVLQALDVVARHLGAQRLISVGRNFFAMKKTHELKGGKELCWGYHQAIRVAEKKLLLNIDQAATVFYEPCELMKLAIAALSPADVRGLSERDMRNLARALRKIEVTPTHRKDRKRAIFGVSPDRADRTMVDIKGETMSVADYFYKKYNTRLRYPNLPLVNVGSKKRENWLPIELCEVAPGQRCPNINDLDTAEIIRQTNQRPHQRRENILSQIRQAGFENDPYLTAFGLKVDQQLETTEVRVLDPPDVQYANVSERPSGGQWNLRDKKFVHGAVLRNWGVVVDANVSPRDVNNFIGIMVDIASKCGLSVECRNPLVIDRSSQRAEVEDLMKTCFRELEDRGNGDPQLIMVIKQDKGSVSYGRIKRMSDTVLGIPSQCIVASNLRKANPQVCANLCLKMNMKLSGKNSVLREPLALISTCPTIVIGADVEHPRSGMGSRPSIASVVASMDAYSAKYIGRVAAQKAANDIQHLVDMLRDLLLAFYRSTNRQPERVIYYRDGVSEGRFHDILQAEMRALRKTFKMLSDNYNPPVTFVVVNKRHHMRAFPINSRDADRKGNVVPGTVLDTGVVSPHRFDFFLHGHSGIQGTSVPCHYTVLHDENKMTADEVQRLTYHLGYTFARCTRSVSFVTPAYYAHLAAGRARFFLY
>Ph_idaeAGO3
----------------------------------------------------------------------------------------------PPSWV------------------------------------------------------------------------------------------------------------------------------------------------------------------------------------------------------------------------------------------------------PYLAAFGLKVDQQLETTEVRVLDPPDVQYANVSERPSG------DKKFVHGAVLRNWGVVVDANVSPRDVNNFIGIMVDIASKCGLS--------------RAEVEDLMKTCFRELEDRGNGAPQLIMVIKQDKGSVLYGRIKRMSDTVLGIPSQCIVASNLRKANPQVCANLCLKMNMKLSGKNSVLREPLALISTCPTIVIGADVEHPRSGMGSRPSIASVVASMDAYLAKYIGRVAAQKAANDIQHLVDMLRDLFLSFYRSTNRQPERVIYYRDGVSEGRFHDILQAEMRALRKTFKMLSDDYNPPVTFVVVNKRHHMRAFPINSRDADRKANVVPGTVLDTGVVSPHRFDFFLYGHSGIQGTSVPCHYTVLHDENKMTADEVQRLTYHLGYTFARCTRSVSFATPAYYAHLAAGRARFFLY
>Ph_paraAGO3
RVMKMNANYFSISLDNAVEVFKYHVDVVRPDQSM--RLPRTLVRKVINAALHQYEAEFGGVRVVHDGMSALFSPQKFKWNARDFPDVNPDGSSGPPTFVVKVKLAETIALRSLEEHYRNDENVMPVLQALDVVARHLGAQRLVSVGRNFFAMKKTHELKGGKELCWGYHQAIRVAEKTLLMNIDQAATVFYEPCELMKLAISALSPEDVHNLSERDMRNLARALRKVEVAPTHRKDRKRAIFGVSPDRADRTMVDIKGETMSVAEYFYKKYNARLRYPNLPLVNVGSKKRENWLPIELCEVAPGQRCPNINDLDTAEIIRQTSQPPHQRRENILSQMHQAGFENDPYLAAFGLKVDQQPETTEVRVLDPPDVQYANVSERPSGGQWNLRDKKFVNGAVLRNWGVVVDANVSPRDVNNFIGIMVDTASKCGISMECRRPLVIDRSNQRAEVEDLMKSCFRELENRGNGTPQLIMVIKQDKGSVSYGRIKRMSDTVLGIPSQCIVATNLRKANPQVCANVCLKINMKLSGKNSVLRELLPLISTCPTIVIGADVEHPRSGMGSRPSIASVVASMDAYSAKYIGRVAAQKAANDIQQLPHMLRDLFLAFYRNTDRQPEHVIYYRNGVSEGRFYDILQTEMRALRKTFKMLSDDYNPPVTFVVVNKRHHTRTFPINTRDGDRKGNVVPGTVLDTDVVSPHRFDFFLYGHSGIQGTSVPCHYTVLHDENKMTADELQRLTYHLGYTFVRCTRSVSFATPAYYAHLAAGRARFFLY
>Ph_ramoAGO3
RTMRVNVNYFGISLDAAVEIFKYHVDVVRPDEIS--RLPRAVVRNVINAALRQYEHELHGVRVVHDGMSALFSPKKLEWNAKDFLNVNPDGPSGPRTFIVKMKLAETIAVSSLQGHYNNNENVMPVLQALDVVARHLGAQRLLSVGRNFFAMKKTHELKGGKELCWGYHQAIRVAENKVLMNVDQAATVFYEPCELMKLVLAALSPADARGLSERDMKNLARALRKVEVVPTHRKDRKRAIFGISSDRADRTMIDIKGAMMSVADYFSRKYHIRLQYPNLPVVNVGSKKKENWLPIELCQVAPGQRCPNINDLDTAEIIRQTSQPPHARRDNILSQIRQAGFENDPYLAAFGLKVDQQLQSTDARVLDPPDVQYANVSERPSGGQWNLKDKKFVSGAVLRNWGVVVDANISQRDVSDFIESMVNVASKCGL-LECRDPFVLDRSSRSGQVEDLMKVCYRELEERRYGPPQIIMVIKQDKGSVSYGRIKRTSDTVLGVPSQCIVAASLRRSSPQLCANVCLKMNMKLSGKNSILRDPLPLVSSCPTIVIGADVEHPRSGMGSRPSIASVVASMDAYSAKYIGRVAAQKAANDIQQLPHMLRDLFLAFYKSTERRPERVVYYRDGVSEGRFYDILQSEMRALRKTFKMLSNDYNPPVTFVVVNKRHHMRAFPFNPHDGDKKGNVLPGTVLDRGVVNPHRFDFFLYGHSGIQGTSVPCHYTVLHDENKLPADDLQRLTYYLGYTFARCTRSVSFATPAYYAHLAAGRARFFLH
>Ph_lateAGO3
------------------------------------------------------------------------------------------------------------------------------------------------------------------------------------------------------------------------------------------------------------MVDIKGEMMSVADYFSRKYHIRLQYPNLPVVNVGSKKRKNWLPIELCQVTPGQRCPNINDLDTAEIIRQTSQVPHARRDNILSQIRQAGFENDPYLAAFGMKVDQQLQSTDARVLDPPDVQYANVSERPSGGQWNLKDKKFVSGAVLRNWGVVVDANVSQRDVGDFIKNMVNVASKCGL-LECRDPFVLDRSSRSGEVEDLMKVCYRELEERRNGPPQIIMVIKQDKGSDSYGRIKRTSDTVLGVPSQCIVAASLRKSSPQLCANVCLKINMKLSGKNSILRDPLPLVSSCPTIVIGADVEHPRSGMGSRPSIASVVASMDAYSAKYIGRVAAQKAANDIQQLPHMLRDLFLAFYKSTERRPERVIYYRDGVSEGHFYDILQSEMRALRKTFKMLSDDYNPPVTFVVVNKRHHMRVFPVNPHDGDKKGNVVPGTVLDRGVVNPHRFDFFLYGHSGIQGTSVPCHYTVLHDENNLPADDLQRLTYYLGYTFARCTRSVSFATPAYYAHLAAGRARFFLS
>Ph_capsAGO3
KTQRVNVNYFSISLDQAVEIFKYHVDVVR----KGDRLPRSIVRKIINAALQQYKTDLGGIRVVHDGMSALYSPQKFEWNSRDFPDVDPDGNRGPPTFIVQMKLAETIAVGSVEDHYSNDANVMPILQALDVVARHLGAQRLISVGRNFFGMKKTHELKGGKELCWGYHQAIRVAEKKLLMNVDQAATVFYEPGELMKIVLAALSPTEIHNLPERDMRNLARALRKLEVVPTHRKDRKRPIFGISPDRADQTKVDIKGETMSVADYFSRKYGVNIRYPNLPLVNVGSKKRESWLPIELCEIAPGQRCPNINDLDTAEIIRQTNQRPSERQQNVLEQIRQAGFENDPYLEAFGMKVNQTLETTDVRVLNAPDIQYANVSERPSRGQWNLKDKKFVSGAVLRNWGVVVDANVSPRDVRNFIGLMVSTASKCGLSVECRDPRVIDRSE-HAEVEDMMKRCFNDLEDRGNGSPQLIMVIKQDKGSVSYGRIKRMSDTVLGIPSQCVVAANLRKGNPQICANICLKMNMKLSGKNSVLRDPLPLISTQPTIIIGADVEHPRSGMGSRPSIASVVASMDAYSGKYIGRVAAQKAANDIQQLPHMLRDLFLAFYQNTNRQPLRVIYYRDGVSEGRFYDILQSEMRALRKAFKMLSDGYNPPVTFVVVNKRHHMRAFP-ESRDADSKGNVVPGTVLDRTVINPHRFDFFLYGHSGIQGTSVPCHYTVLYDENKMSADEVQRLTYHLGYTFARCTRSVSFVTPAYYAHLAAGRARFFLY
>Ph_kernAGO2
KTMQLQVNYF-------------------KDETMGDRLPRALVRNIINAALRQYESEFAGIRVVHDGMSALYAPSMLPWDAKTFVEVNPDGTT-PRTFVVKMKLAESIPTSSLTDYYSNDVNVMPVLQALDVAARHLGAQRLIAVGRNFFSMKKTFPLKGGKELCWGYHQAIRIADRKLVMNVDQAATVFYAPKELMELVLAALSANDIRGLSDRDSKNLARALRKIEVVPTHRKDRKKAIFGVSAQPADHTMVSIKGEEMSVADYFSKRYNTQLRFPQLPLVNVGSKRKESWLPIELCEVAPGQRCSNINDLDTAEIIRQTSQPPKTRQETIIDQVRQAGFENDPYLSAFGVKIEQRLETTEARVMDPPDVQYANVSERPSGGQWNLRDKRFVEGATLRNWGVVINANVGERDVQGFVRNMVDMGNKSGLTIEDGNPYIIHQDHRGAQVEELMKMCFEELKQRNKGPPQLIMVIKQDKSVGSYGDIKRMSDTMLGIPSQCIVSANVRSAKPQYCANVCLKINMKLSGKNSILREPLPLVSTAPTIIIGADVEHPRSGMGSRPSIASVVASLDRYSAKYVARVAAQKASSDIQLLPHMLRDLFLAYYQSTSRKPEHVIYYRDGVSEGQFYDILQTEMRALRKAFKMISDDYNPPVTFIIVNKRHHMRAFPVNQRDGDRKGNVVPGTVIDTGIVDSHRYDFFLYGHSGIQGTSVPCHYTVLHDENKMSAEDVQ--------------------------------------
>Py_ultiAGO2
KTIPISVNYFNLSVDSSTEIFKYHVAVELKDVTMSDRLRKQLVRMVINAVLQQYEADFDGIRVVHDGMAAIYSPRRLPWDTKDFLEVNPDGPVGPRTFSVKLKYVETINMRELTEYYTNEANPMPALQALDVAARHLGAQR------------------GGKELCWGYHQSIRITQKKLMLNMDQAATVFYAPGPLIELVLAALDARDVRHLSEREAKNLSRALRKIEIVTTHRVDRKKPINGISSQPVDATMIEIEGKEVSVADYFSQRYNVTLRFPNLPAVNIGGRKKPTYLPIEVCEVAPGQRCSNINDLDTAEIIRQTSQKPNLRQENIMDQVRGAGFENDPYLSAFGMKVELKMENLDARVLETPEVQYANISERPNMGSWNLRDRRFVEGASLRNWGVVIHANISERDVQRFIGTMCDVARKCAIDIHDTNPVIVHQDSRAAQVEELMTICHRDLENRNLGPPQLIMVIKKDKTVGPYSDIKRMSDTVLGIPSQCIVAANVAKSQAQYCANVCMKINMKLNGKNSILRDHLPLVSSSPTMIIGANITHPRSGMGSRPSIASVVASLDRYSAKYVARVAAQKASNDISSLPFMLRDLFLAYYQATNRKPEHIVYYRDGVSDGQFYDILQTEMKALRKACMMMSEDFIPPVTFIVANKRHHMRGFGLNSRDCDRSGNIQPGTVIDTGIVDSHRFDFFLYGHSGIQGTSCPAHYTVLHDENNMSADDVQKLTYSLCYTFARCTRSVSVVPPVYYAQLAAARANFFLN
>Py_irreAGO2
KSIQMSVNYFGLSVDPKSEIFKYHVAVELKDVSMAGRLRKPLVRMVINAVLQQYEAEFGGIRVVHDGMAAVYSPQRLPWDTKDFEEVNPDGPVGPRTFSVKLKYVETINMQDLFEYYTNDVNPLPVLQALDVAARHLGAQRLIPIGRNFFSMKKTHPLRGGKELCWGYHQSIRVGQQKLLLNMDQAATVFYAPGPLLDLVTAALEARDVRQLSERESRSLSRALRKIEVITTHRVDRKKPIFGISSQPVDATMVEIDGKEVSVADYFSQRYKVNLRYANLPAVNIGSTRRPTWLPIEVCEVAPGQRCANINDLDTAEIIKQTSQKPHIRADNIMEQVRSAGFENDPYLSSFGMKVDPRMETLEAKVLETPEVQYANISERPNMGAWNLRDRRFVDGAVLSNWGVVVHANIRENDVQRFVGTLADVARKCGMEVKDQNPIITHQDARGAQVEDLMQTCFKELEHRNMGPPQLIVVIKKDKTVGPYSDIKRMSDTVLGIPSQCLVAANVQKGQVQYCANVCLKINMKLSGKNSILREHLPLVSSTPAIVIGANISHPRSGMGSRPSIASVVASLDRYSAKYVARVAAQKASNDISTLPYMLRDLFLAYYQTTHRKPEHIIYYRDGVSEGQFYDILQTEMKALRTACMMMSEDFMPPVTFIVVNKRHHMRGFSQNRNDCDRSGNIQPGTVIDTGIVDVHRFDFFLYGHSGIQGTSCPAHYTVLHDENKMSAEDVQKLTYNLCYTFARCTRSVSVVPPVYYAQLAATRARFFLN
>Py_iwayAGO2
KSIQISTNYFGLSVDSKSEIFKYHIAVDLKDVSMAGRLRKPLVRMVINAVLQQREAEFGGIRVVHDGMAALYSPQRLPWDVKDFDDVNPDGPVGPRTFSMKLRYVETINMQDLFNYYSNDVNAMPVLQALDVAARHLGAQRLIPVGRNFFSMKKTHPLKGGKELCWGYHQSIRVGQQKLLLNMDQAATVFYKPGPLIDLVTAALEARDVRQLSEREAKSLSRSLRKIEVLTTHRVDRKKPIFGISSQPVDQTMITVNDKEISVAEYFSSRYNTTLRYANLPAVNTGSKARPTWLPIEVCMVAPGQRCANINDFDTAEIIKLTSQKPNIRSDNIMDQVRSAGFENDPFLSAFGMKVDLRMESVEAKVLDTPEVQYANISERPNMGNWNMRDRRFVDGATLHNWGVVVHANLSERDAQRFVQTLCETAKKCGMDIQDENPVITHQDARGAQVEDLMQTCFKELEHRNKGPPQLLLVIKKDKTTGPYSDIKRMSDTVLGIPSQCVVAGNLSKG-VQYCANVCLKINMKLSGKNSILREHLPLVTSSPSIIIGANISHPRSGMGSRPSIASVVASLDCYSAKYVARVAAQKASNDISTLPYMLRDLFLSYYQSTHRKPEHIIYYRDGVSEGQFHDILKTEMTALRTACMMMSEDFMPPVTFIVVNKRHHMRGFSTNRNDCDRSGNIQPGTVIDTGIVDAHRFDFFLYGHSGIQGTSCPAHYTVLHDENKMSAEDVQKLTYNLCYTFARCTRSVSVVPPVYYAQLAAARARFFLN
>Py_aphaAGO2
RSTQVTVNYFALSLDTSREIFKYHVSVERKDEPMTDRLSKQIVRMVINEALRTNEADFGGVKVVHDSMSAIYAPTRLPWTHTVIKGVNPNGHLGPPTFDVTIKEVENIPVTDLDTYYGNEANPQRILQALDVVARHLGAQRMVPVGRNLFSVKKSHPLQGGKELCWGYHQSIRIGQGKLLLNIDQAATVFYAPEPLLTLAMAAVDPRDMERLDDRQLRMLHRALRKIEVVPNHRSDRKRPIIGVSNVPADGLMVDIKGERKSVAQYFAEKYHSSLKHPYLPAVNVGSKNKETWLPLEVCDVAPGQRCANINELDTAEIIRKTSTRPRERQSNIMDQVRGAGFENDPYMNAFGLRVEQKMESVQARIMPTPEVQYKNVSERPNLGSWNLRDKEFVDGAVLDNWGVVIESSMNRSAIENFLRAFCDMARKSGMQVRNDRPPIVDDGGRGSSIEELMLECFHQVERR--GPPRLLMVIKRDQSVGSYGEIKRVSDTVLGIPSQCIASKNVPKANPQYCGNVCLKVNMKLGGKNSVLREKFPLISDYPTIVIGADVEHPRSGMGNRPSIASVVASLDRYSAKYVGRVASQK-GNDIQKLPSMLRDLFLAYYQNTGRKPERVIYYRDGVSEGQMNDILQTEMKALRQACLMMEDDYVPPVTFIVTNKRHHMRAF---GDQVDRSGNLVPGTVIDTGIVDSHRFDFFLYGHSGIQGTSCPAHYTVLYDENKLSAENIQSLTYNLCYTYQRCTRSVSVVPPVYYAHLAAARARFFLN
>Py_arrhAGO2
RSISLQVNYFGLKFDTN------------KDE----RLSKNVVRMIINETMRVLEPELGGLKVVHDSMASVYAPARLPFTHRVFKGINPNG--GPPTFDVTIKEVETIPVTDLTDYQRNDVNPQRIIQALDVVARHLGAQRMIPVGRNLFSMKKTHPLQGGKELCWGYHQSIRVGQSKLLLNIDQAATVFYAPETLLTLAMAVLSVRDMDRLDERQLRQLHYAFKKIEVVPTHRSDRKKAIWGVSSMPVDALMMDMKDGRKSVATYFAERYGSGLKYPFLPAVN-------------------------------------TSQKPRERQRNIMDQVHGAGFENDPYLAAFGLNVDQTMETTSARVLDTPEVQYKNVSERPYMGAWNMRDKEFVDGATIEHWGVVVEGNMGRSQIDNFLRH-----------------------DRGASLEELMHECFREIERKSGAPPKLIMVIKRDASVGSYAEIKRVSDTVLGIPSQCIVSKNVPKASPQYCANVCLKVNMKLSGKNSVLRDPIPLISEVPTIVIGADVEHPRSGIGNRPSIASVVASLDRYSAKYVGRVAAQK-GNDIQKLPGMLRDLFLAYYQHTGRKPERVLYYRDGVSEGQFYDILQAEMKHLRRACLMMEDNYLPPVTFVVTNKRHHVRGF--SEQNLDRSGNLQPGTIIDTGVVDPHRFDFFLYGHSGIQGTSCPAHYTVLHDENGLTSNDIQKLTYQLCYTYQRCTRSVSVVPPVYYAHLAAARARFYLN
>Al_candAGO2
KTVPIQSNHFSVTLNVTTEVFKYHVAIERKATVEEDRLRKSLVRMILNELIRQNEEKFGGVRVVHDGMSSIYAPEKLAWDEETFKNVNPDGPKPPPTFDVKIKLVEAIPFCTLSDYYSDEVNVMPILQALDVAARHLGAQRLIGVGRNFFSMKKTHPLKGGKELCWGYHQSFRLARDRLLLNVDTAATVFYAPGPLLDIVTAALDIRDTRHVDQKSLKSLTRALRRIEIVPTHRSDRKRTINGISPEPADSTFEEIKGQKMSIVEYFSARYNITLKYPHLPLVNLGRKNRPNWMPIELCQVAPGQRCSNINDLDTAEIIRQTSKKPAERMRNILDQLQQAGYENDPFMKAFGLKVDPNMITYDARLLEAPEVQFSNVSERPFNGAWNLRDKRLVDGATLSSWGVVVEANVPKHTLQRFLDTLCDVGCKSGLNIETRNPVVIESQER-APIEELMVICAKESANKFGTQAQLIMVVKRDGNVGSYGDIKRVSDTVLGIPSQCVLSKNLSKG-PQYCANVCLKINMKLSGKNWVLKNQFPLLSTAPTILIGADVEHPRSGMNSRPSIASVVASLDRYASRYVARVAAQKASDSIHGLPLMLRDLLLAYYQSTGRKPDHIIYYRDGVSDGQYYNILQTEMKAIRKACKMMEEDYLPPVTFIVVNKRHHVRVSSKAREICDRNGNMIPGVIIDTEICDPHRFDFYLYGHAGIQGTSAPAHYTVLFDENKLSADDIHTLTYNLGYMFARCTRSVSVVPPVYYAHLAAFRARFFLN
>Ph_sojaAGO5
KTVPLKINYFGVEIVSGNQVFKYHVTVAHVAGD---RLQRSLVTSVVNAVLRQNEEEFAGIRVVHDGMSALYSPTKLPWASKTFTDISLSTLPGPRTFVVTMTGGD-----DLHDGFT-TTLLRPVLQALDVVARHVACQRLTVVGRDLYTLKDPHSVHGGKELCWGYHQAIRKAEDKLVLNLNETSAVFYTPGSLMQLTLSALDPSRIRTLSKLELKNLAHALHNVEVKPTHREGRARAIYGVSAEPADQLLVNIKGKEQTVAEYFDSKYAKRLKYPRLPCANVGSKRKETWLPIEVCEVVPGQHCANADELDSPSITKLTAIPPAKRERNILDHVKDATFSNDPYLAAFGMKVMLKMETTNARELEPPCVQYRNTSERPRNAEWRLKDKIMVKGVPFKHWGVLILDEVDASVVRKFVRMLCDVGRQRGLFIKNNDPVFIHQNDRTTDVEELVRICYQRVAER--GPPEMLLVVLPDTRSWLYGPVKVMADTVLGVSCQCVASKNLRKANAAFCANVCLKLNMRLDGKNAVLRDPLPLLSTSPTIIIGADLEHPRPGMGSQPSIAAVVASMDAYSAQYAARMGAQKASEDIQKLPNMLRELFHAYYERTKRKPEHVVYYRDGVGDGQYSDILKAEIRALRKAFKMISDNYSPPITFIVANKRHHTRAFPVDRRDADHKGNVKPGTVVDSGVLDPHRFDFFLYGHSSLQGTSKPCHYTVLYDENNLSADDIQLLTYHLGYTFSRSTHAVSVAAPVYYANEAAARARHFLK
>Ph_meloAGO5
RTVPLKINYFGIEIVSGNQVFKYHVTVAHADPD---RLQRSLVTGVVNAALRQNEEEFAGIRVVHDGMSAVYSPAKLPWTSKEFKDVSLATLSAPRTFVVTMTLVETICMRDLLEHYSDDVNVMPVLQALDVVARHLACQRLTVVGRDLYTLKDPYSLHGGKELCWGYHQAIRKAKDKLVLNLNETSAVFYTPGPLMQLTLSALDPSRMRTLSTLELKNLAHALHNVEVKPTHREGRARAIYGVSAEPADQLLVSIKGKEQTVAEYFESKYGKRLKYPRLPCVNVGSKRKETWLPIEVCEVVPGQHCANADDLDSPSITKLTAIPPATREKNILDHVKDAAFSNDPYLAAFGMKVTLEMETTNARELEPPCVQYRNTSERPRNAEWILKDKIMVKGVPFELWGVLILDEVDTGVVRKFVRTLCDVGRQRGLAIENSDPVFVHQNGRTADVEDLVRVCYQRVAVR--GPPEMLLVVLPDTRSWLYGPVKVMTDTVLGVSCQCVASKNLRKANAAFCANVCLKLNMRLGGKNAVLRDPLPLLTTSPTIIIGADLEHPRPGMGSQPSIAAVVASMDAYSAQYAARMGAQKASEDIQKLPNMLRELFHAYYERTKRKPEHVVYYRDGVGEGQYSDILKAEIRALRKAFKMISDNYNPPITFIVANKRHHTRAFPVDRRDADRKGNVKPGTVVDSGVLDPHRFDFFLYGHSSLQGTSKPCHYTVLYDENNLSADDIQRLTYHLGYTFSRSTHAVSVAAPVYYANEAAAHARHFLK
>Ph_cinnAGO5
RTVPLKVNYFGLEIVSGNQVFKYHVTVERADGT---RL-RSLVTSVVNAVLRQNEAEFGGIRVVHDGIAALYSPAMLPWNSKEFKDVSLYPPQGPRTFVVKISLVETICMQSLLDHYSDDVNVMPVLQALDVVARHLACQRLTIVGRDLYTLKETHTLHGGKELCWGYHQAIRKAEDKLVMNLNETSAVFYTPGPLMDLVLSALDPRHIRTLSRQELKNLAHALHKVEVEPTHRDGRPRAIYGVSTEPSDQLLVSIKGKEQTVAEYFNAKYTLRLRFPRLPCVNVGSKRKETWLPIELCKVVPGQHCANSDDLDSPAITKLTAVPPATREKNILDRVKKAEFSQDPFLVTFGMKVKLKMEVTNARILEPPCVQYQNTSERPTNGEWSLKDKIMVKGESFDNWGVLILDQVDSSVVRRFARTLCDVGRQRGLFKKNTEPIYVHQNERDADVEELMRICFQRVAER--GPPEMLLVVLPDTRSWHYGPVKVMSDTVLGVSCQCVASKNLRKANAAFCANVCLKLNMRLNGKNAVLYDPLPLLSTSPTIVIGADVEHPRPGMGSQPSIAAVVASMDAYSAQYAARVGAQKASNDIQKLPTMLCELFHAYYQLTQRKPEHVVYYRDGVGDGQYSNILQAEIGALRKAFKMISENYSPPITFIVANKRHHTRAFPVDRRDADRKGNVKPGTVIDAGVVDPHRFDFFLFGHSSLQGTSKPCHYTVLYDENKLSVDDIQRLTYHLGYAFSRSTHAVSVAAPVYYANEAAAHARHFLK
>Ph_sojaAGO8
KGVRLKVNRFAVSLTAASEIFKYHLSVER-------RLPRSLLRSVIKAAFRQHEAEFAGVRVVHDGKTAVYSPVMLPWEGKKFDEISIDNTI--NTFVVNIKLADIIEM----NYASNSVNVQPVVQALDVVMR-----------------RRSRCMAGSN--C---AQDSTTADQKLLMTIDCVSKVFYEPNALMVPVLAVLSAANIHDMSAQEKEILATAVHKVEVIPTHRNDRKRAIVGVSELGAGQLMVSIKGDTMSVAEYLNKRYRTKL-----------SERKEIWLPIELCELASGQRCRDISRMDEAGIILRASQPPNARHKAIDEYAHALGFEDDPYLTAFGMKVSLETEMVNARVIEPPELQFETSVGKSTGGSWSLRGKRIVDWAVLHKWGIVVTANMSEEKVHEFVSKLIDAAH-----------------HAGTQAEDLMRMCFSTLEERDKGEPQLIVVVKEARTDGLYDTIKRVSDTVLGVP----MHLGIERAQG-----YVVVLYMKLGGTNWTLQQPVPLIQSAPTIIIGADVE----AL----------------------RVTSTS-----------FRICVLAYYARTKCKPERVLYYRNGVSEGQQFDVLQAEMRALVKAFKMISEHYRPPVTFVVANKRHHLRAFPVESRDADHMGNAVPGTVIDAGVVDPHRFDFYLYGHVIPLGTKVPCHYTVLHDENNLSADDITRLAYHLGYTVSRSSHSVAVVAPLQYARL----ARLFLK
>Ph_pisiAGO8
------------------------------------------------------------------------------------------------------------------------------------------------------------------------------------------------------------------------------------------------------------------------------------------------------------------------MDEAGIILRASQPPNARQNAIDEYAHALGFEDDPYLTTFGMKVSLEPETVNARVIEPPELQFETSVGKSTGGSWSLRGKRIVDGAVLHNWGIVVTANMSEEKVHEFVSKLIGAARKMGLTVEDDQPCIVRADHAGTQAEDLMRMCFGTLEERDKGEPQLIVVVKEVKTDGLYDTIKRVSDTVLGVPSQCILASNARRATSSSCANLCLKINMKLGGTNWTLQQPVPLIQSAPTIIIGADVEYARSGVGSRPSIAAVVASVDQYPAHFAARVAAQSTSSDIYQLPNMLRELVLAYYARTKRKPERMLYYRNGVSEGQQFDVLQAEMRALVKAFKMIWEHYRPPVTFVVANKRHHLRAFPVESQDADHMGNAVAGTVIDAGVVDPHRFDFY----STATESSLSARKSLLHDENNLSADDITRLTYHLGYTVSRSSHS--VVAPLQYARLAAARARLFLK
>Ph_ramoAGO5
RTVLLNINYFNVSIDSAREIFKYHVTVERQDGAPSARLQRSLVRDVINAALRKFGEEFAGVRVVHDGMSALYSPVILPWSSKEFADVDLGGVGGPRTFVVKVNLVETISLSTLEDFYSDMVNVMPVLQALDVVVRHLAAQRLVAVGSEFYSLKKTHTLNAGKELCWGYHQAIHAAERKLLVNVDQATGVFYSPGPLMRLVTAALSPREVQRLSDRQLKELARALRDVEVIPTHRKDCKRAICGVSALSPHQIFMNAKGKEISIAGYFSERYGKQLEYPSLPLVNVGSKRKETWLPIELCTVAPGQHCASSEDVDAPEITRLTSQPPQTRQANILEHVRQARFEHDPFLEAFGMKVEQRLQRIEARVMDGPHVQYQN--------------------------GVIVLADVWNNEVRKFLQTLCEVGNGHGLPFENTRPEFVHQSERGVGVDELMTKCFRQLEERRAGPPQLLLVILPDTSSFLYGDVKRTSDTVLGIASQCIASKNLRKANAAFCANVCLKINMRLNGKNAVLRGPLPLISTAPTILVGADVEYPRPSSDYQPAIAAVVASMDAYSAQYAARVAAQKTSSEIQRLPHMLRELFLAYFENTKRRPEHVMYYRGGVGKGEMVDILQAELRALRMAFKMISENYSPLVTFIVANKRHHTRAFPVSPRDGDRKGNVKPGTVVDAGVVDPHRFEFFLWGHTSLQGTSKPCRYTVLHDENNMSAGDVQQLTYHLGYTFSRSTHSVSVVTPVYYANEAAAHARHFLR
>Ph_sojaAGO6
----------------------------------------------------------------------------------------------------------------MDTYLADKVDVQPLLHALDAVARYQSSQKLITAGSKLITTTQTKSLSSGKELCWGYRQTLRMTERKLLLNVDQTTRICYAEGPLEDLVAKALRLEDIRRLSEQEVKKLARVLRRIKVEPTHRSERPRPINGVSSQPADMTMITIEETEMSVAAYFLGRYKLKLQCPTLPPVNVGGRRTETWLPIELCRVTKGQLCHDEDESDARETIRMSSQDPRTRQANIAARVREAEFDKDPYMAAFGLEVDERFQRTRARVLDAPDVHLRVVNGI-------LRGKRFVDGVHVQNWGIVVLADMKDDKLDYFLDRLTAVGEKHRLVF--SKPIRIHYNEDNMPLDSLVTFCYEELTENEHGPPQLLMVVKSDNNSEEYGRIKYISDTVLGLPSQCVVATTLLNSLAQICGGLCLKVNLKLNGKNAVLRQPLPLVSSSPTIVFGACVEHPRPGM-DKPSIAAVVASMDRYSAHYVSRVAAQTSSNDVQHLPRMLRELFLAYYQSTEREPEHIIYYRDGVDEGRMEDVLKGEVSAIRKAFMMISTGKAPPITFIMANKRTSLRSFLVNPRDGDKKGNVRPGTVIDTGVVDPHRFDFYLYGHSSAQGTSVPCHYTVLFNENNLSAEDIQRLTYHLDFTSPRST----------LGRHTRQRAQIYQQ
>Ph_paraAGO5
RTIPVNVNYFKVSVDKAKEIFKYHVTVERITEDPGGRLPRALIGTVINATLLQYKESFEGVRVVHDAMASLYAPVKLSWTLKEFVDVDPDNTDNFRTYLVKMKMVEVISLATLNNYYSDSVNVMPVVQALNVVARHLATQRFVTVGSELYNMKKLRLLSGGKEIYGGYHQALHVADHKVVMNINQTIGVFYSPGPLMDLVMAALNVNDIKNLSEKQLKGLARALRKIDVFPTHRSDRRRPICGVSAMGADRTMMNYKGEVKSVANYFSDRYQKTLQYPSLPMVNVGSKRKETWLPIEVCTVAPGQHFSSSDNVDQPEVIRLASQPPRARQADILNHVHQAGFENDPYLEAFGLNVEQRFQTVEARVMDGPYVQYENVSVHRSDGQWSLNNKKLVCGMSIRNWGVVVLGETRKSEVNKFKDKLCEAGDERGMPFKNKHPVVILQRDRDMEVDELMELCLRELLKNEEGSPQLILVILPETNSVHYGEVKRMSDTVLGIASQCVVAEKLRKANAAFCANVCLKINMRLGGKNAVLKGPLPLISAAPTIVIGVDVERSSYGMDDQPAIAAVVASMDAYSAQYAARVAAQNPRKSIEKLPKMLKELFLVYCKNTERRPEHVLYYRDGVSDGEMQSVLQTEMRALCTAFKMISGDYKPLVTFIVANKRHHVRAFPVNSRDGDSKGNVKPGTVIDSVVMDPHLFSFYLWGHSTLQGTSRPCHYTVLYDDNSLAAEDVQLLTYHLGYTFARSTHSVSVITPVYYANEAAAHARHFLE
>Ph_capsAGO2B
KTIDIRVNYFSVSLHSAVEIFKYHVSVEKNDTG---QLPRSLVRKVMDAGLRQYKSDFGGACVVHDGMSAIYVPSRLYWDFKTLSNINPDDPQHRRTFSMTIKLVEAISTRSLVDYYNNDVNIMPVLQALNVIACHLGAQRLTNVGRSFFSMQSPTPLGGGKELCWGYHLSIRIGDSKLLMNVDQKATVFYTPGELTEIVLPMVSVNDTRGLSDHDKRKLESVLNHLEVRPIHRKGWKRAIYGISAQPAYQTMVNIRDEDMSVADYFLKNYNVTLRYPYLPLVNVGRREKETWLPIELCRVAPAQRSTNVTDVDTAEILTKTGQPPRARQANTMKQVLQAGFENDPYQAAFGMTVDQNFVKIQARVMDPPEVQFANVSVRPPRGQWDLQ--RFVDGVTLRNWGIVVAANVTERDVSKFVGVLVSIAGKSGL-MIDGRPHMTHRDQRGAPVKELMTMCLKELEARNKGPAQLIMVVMEERSDEEFREINYTSDTVLGILNQCILAENLRDAKPSICRNLSLQINSRLGGKNSILRDPLPLVSTAPTIVIGADVDHPRPGMGSRPSIAAVVASMDCYSAKYIARVAAQTAANDIHHLPHILRDLFLAFFKNTNRKPEHVIYYRNGVSEGQFHDILEAEMRSLRVAFKMISADYNPPVTFIVVNRRHHTRAF-------ENDSNMAPGTVIDTGIVDSHRFDFFLYGHHGPLGTSVPCHYTVLHDENKMSAEDVQRLTYFLCYTCARCAKSVSCAVPVYYAQVVAERARLYLN
>Ph_cinnAGO8
KVVQLKVNCFAISFSGAPEIFKYHLNVELNDEATSSRLSRSLVRKVINAAIRERETEFAGIRVVHDEYDIIDRSR------RRIRQIPP----ARKIFVVNVKLT-------------------P------------------------FSI-------GGKEMSSGYHQTVHVADQKLLMNVDCATEVFYEPNALMVLVLAALSRADIRDLSNHDKEIIAHAVHKIEVVSTHRDGRQRAIIGVSPLPADQTIVSTNGEAKSVVEYFSERYKLKVRFPQLPCVNVGSERKEIWLPIEVCEVAPGQRCNNIHKMDEAGIILQASQPPASRQKRIVEHVRQSAFDTDQYLTAFGMKVSTEPETVNARVIEPPDVEYENASGKPANGMWSLRGKRLLEGSILRNWGIVITASICEEEIEDFVHKFVEVARDMGLTVEDNQPYLIHA--EGSKVEQIMKTFMSATR-----EPQLIMVVKEAKTDG----MNDTSRTLLGEPSQCILAPDARSALSSCCANLCLKVNMKLGGVNWKLQEPAPLIQSIPTIIIGAEVHYAHSGVGPRPSIAAVAASMGQNSAQYAARVAAQNTASDIQQLPSMLRELLLAYYTHTKCKPERVLYYRNGVSEGQQFDILQAEMRALLKAFKMISESYCPPVTFVLANKRHHLRAFPVQRRDADYEGNAMPGTVSTR---------------ESLTRTALTS--TCMATDSSLSAQWC-LVTTRCCTTTTTCRRTKCSSSPT----ISDTHLR----
>Ph_sojaAGO9
KTV------------------KL-----------------------------QYATEFGGTRVVHDGGSLMYSPVLLPWAAKTFENVDPDSVETTGTFVVKMKLADVIAVKSLRDYYSKRT----ALQALGVILRCFARQRLVSVERKFFSIEELVPLHGGAELRRGYHQAVRVADHKLLLKLDKTTLSFYTPGNLTELVTATLSPSEISVLTYGEQRKLARALRRIEVTFTHRTGISHRIYASAR-------LHFGGKTMSVAEYFSWRHNIQLQHPNLPLVNVGSKRRENWLPIELCKVAPGQRK---SELDDPKVTKQAREFSNIPLETVIGRVRRISFDDNPYQDAFGLKIEQRLVIVNAHVIPPPEVQYANVSTSPLD----------------------VFSSIGEGEVRSFVSNLVKMGEECGLSFEDSDPCMVRSDGRGVDVEKLMKMCFEELEMCNKGPPQLIMVIKPDKCANSYARIKQMSDTVLGVPSQCILSQKIVTAKPHYYASLCLKIKMKLDGKNAVVRGLLPFPNSAATLVIGASVEH--NGNWGRPSTASFVASLDCSSAKYVARVAEQKTLGDMKLLTRVQYELLVTWHQITGQIPENVVYYRGGASQDQHFGVLQTEMNALRKAFRMLLADCPPLITFIAVNKRHHVHAFPTNSSDGNCENDVEPETIIDTGIVDAHGFDFYLYGHNSGHGTTIPCHY-----------------T-----------------------------------
>Ph_pisiAGO9
----------------------------------------------------------------------------------------------------QFELA----------------------------------ERLVSVERKFFSIEELVPLHGGAELRRGYHQAVRVAGHKLLLKLDKTTLRFYTPGNLTELVTATLSPSEISVLTYGEQRKLARALRRIEVTFTHRTSISRRIYGLSSTSTTDGFVYFGGKTLSVAEYFSWRHNIQLQHPNLPLVNVGSKRRENWLPIELYKVAPGQRK---SELDDPKVTKQAREFSNIPLETVIGRVRRISFDDNSYLDAFGLKIEQRLVTVNAHVIPPPPQKCSMRMCQP---------------------------------VHWTVSEIWGRSAGC-----PSDPCMVRSDGRGVDVEKLMKMCFEELEMCNKGPPQLIMVIKPDKCANSYARIKQISDTVLGVPSQCILSQKIVTAKPHYYASLCLKINMKLNGKNAVVRGLLPFPNSAATVVIGASVEH--NGNWGRPSTASFVASLDCSSAKYVARVAEQKTPGDMKLLTRVRYELLVTWHQITGQIPKNVGYYRGGVSQDQHFGVLQTEMNALRKAFRMLLADCTPLITFIAVNKRHHERAFPTNSSDGNCENDVEPGTIIDTGIVDAHGFDFYLYGHNSGHGTTIPCHY-----------------T-----------------------------------
>Ph_fragAGO9
KAVKLQVNCVELSVDSTSEIFVYHVAMARKDES---RFPRALMRRVFDAVIWQYEAEVGGVQVVHDGTSLMYSPVLLPWTAKMFRDVDPNSVERTGLFVVSAKLVDAITTKSLTEYYSNNVDAMPALQALGVILRCLARQRLVSVQRNFFSIEVLVPLCGGTELRWGYHQAVRVADHKLLLTLSRTTTRFYSPNDLMTLVTATLSPSEISLLLDWERRKLARALRRIEVTPTHRNDSKRSIYSISTTSASETMVNVWGKTISVVEYFSTKYNIQLQHPNLPL-----------------------RTRDLSNLETAEVTKQIREFANISVESVVDQIRRISFDDNPYLDAFGVKLAQHLMTVDAHVINPPEVQYANVSSRPVDAQWNLRGKKFVDGAVLRNWGVVVLSSTGEDIVRTFVFNLVKMGDECGMSFEDIDPFVVRADRCG-----------------------LIIVIKPDKCTESYGRIKRMSDTVLGIPSQCVVSSRILAAKPHYYASLCLKINMKLGGRNAVVRELLPFASTSATVIIGANVEH--VGRWGKPPIASFVASLDSSYAKYVARVAQQKAPGDVELLSRMLHELLLTFYQATSQIPQRVVYYRGGASQDQYFGVLQAEMKALRKAFKLLSADCKPRVTFIAVNKRHHLRAFPMNSSG---ENNVEPGTIIDTGVVDAHGFDFYLYGHKNDQGTTTPCHYTVLHDESALSAEDVHRLTFHLGFTLGRSTRSTSLVAPVYLARLAARRARREVS
>Ph_rubiAGO9
KAVKLQVNCVELSVDSTSEIFVYHVAMARKDES---RFPRALMRRVFDAVIWQYEAEFGGVQVVHDGTSLMYSPVLLPWTAKMFRDVDPNSVERTGLFVVSAKLVDVITTKSLTEYYSNNVDAMPALQALGVILRCLARQRLVSVQRNFFSIEVLVPLCSGTELRWGYHQAVRVADHKLLLTLSRTTTRFYSPNDLMTLVTATLSPSEISLLLDWERRKLARALRRIEVTPTHCNDSKRCIYSISTTSASETMVNVWGKTISVVEYFSTKYNIQLQHPNLPLVNIGSKRRENWLPIELCEVASGQRTRDLSNLETAEVTKQIREFANISVESVVDQIRRISFDDNPYLDAFGVKLAQHLMTVDAHVINPPEVQYANVSSRPVDAQWNLRGKKFVDGAVFRNWGVVVLSSTGEDIVRTFVFNFLKMGDECGMSFENIDPFVVRADRCGVCVEELMEMCFEKLKLCDKGPPQLIIVIKPDKCTESYGRIKRMSDTVLGIPSQCVVSSKILAAKPHYYASLCLKINMKLGGRNAVVRELLPFASTSATVIIGANVEH--VGRWGKPPIASFVASLDSSYAKYVARVAQQKAPGDVELLSRMLHELLLTFYQATGQIPQRVVYCRGGASQDQYFGVLQAEMKALRKAFKLLSEDCKPRVTFIAVNKRHHLRAFPMNSSD---ESCVEPGTIIDTGVVDAHGFDFYLYGHKNNQGTSIPCHYTVLHDENALSAEDVHRLTFHTNLFEVRASESACTSSDMHLFKHAVKKMQRALR
>Ph_meloAGO9
KTVKLQLNCLGLPVDSLSEIFMYHVDSAR-------WFARSLMRREIDVAIRQYAADFGGVRVVHDSGSLMYSPVLLSWAAKTLENVNPHCVESAGTFVVKMKLADVIAVNSLADDYADNVKPGP--------------WRLVSVERRFFSIEVLVPLPGEAELRWGYHESVR-----------GPTTTFYPPGDPMELMAATL-------------EKLARALHRIEVTFTHRRGITRRIYGLSSTSTSEALVHFGGKTMSVAEYFRGRYNIPLQHLNLPLRRSG--------------------------LDGLTVTKQTREFSNILLETVIDGIRRISFDDNPYLDAF--------------------VQYANVSTSPLNAQWNLRGKKFVEGAVLHNWGAVMLSSIGEL----FASNLVKMGGECGLAFEDTDPCMVRLDERRVG-------------------------------------IKRMSDTVLEIPRQCVLSQKIVTAKPHYYTSLCLKMNMEL----------------AATVVIGASVEN--NGSWGRPSIALFAASLDCIAAKYLARVVEQEKTGDVKLLTRVLHELLLACCQITGQIPQHVV-------------------------------DCKPLVTFIAVNKRHHVRAFPINSSDDTCENIVEPRT-----VVDAHGFDFYLYGHKSGQGTTNPCHYTVLNDENALSVEDVHCLTFHLGFTLGRTTRSSSFAVPRPAERVAAGEKH----
>Ph_meloAGO8
KVVQLK-------------IFKYHVEVEHDGATTSSRLPHSLLRSVISAARCQEEAEFGGVHVVHDGKSALHSPVLLPWEGKTADEISPDN--PKEQVVVNIKLVDIIET----NYASYNVNGEP----VDVVTRYLSAERWIAA----FTR-----------------QSTSRTKSCI-----TSRARYWCPFWLRE------SAANIQAVSAQDREILATAVHKIEVFPTHRKDRKRAIVGVSELSAGQLMVSIKGDAMTVADYLSKRYRLKLRFPQLP-------------------------------MGEAATILRASQPPNARQKAIDEYAPAVEFEDNPYLSVFGMKFE-------------------NGVGMLADGLWGLR-----AGAVVCNWGVVVTVSMSEEDVEEFARRLVDAAH-------------------------LTRMCFSTLETRNKGGPQLIMVIKDAKSDGLDDNIKRMSDTVLGVPSQCILASNARRATSSCCANLCLKINMKLGGTNWALQQPLSLMQSTATIIIGAEVEYARSKLDPQPSIAAVVASVDHYPAQFVTLVAAQNTSSDIQQLLNMQRELLLAYHARTKRRPERVLY-------------------------------------------------------------------------------------------------------------------------------------------------------
>Ph_cinnAGO6
SAQRLLSNCYRVVLDAASRIYQYHVTVELGGKLFGGRLLRPLLRQVVHDAIGQNQDLFGRILVVHDGANALFTPTALPLSSEAVELIVCSTARKKRSFTVRVRLAKELETSLLLEAFSKEVDVKPLVYALNAAVKAGLVSRVEYQGN-LYSRIDALNMNGGRVLYKGHHQTIRLGAGSLVLNLNRVWREFYAEGPLLDGVSDTLHYDDIRV--GDLQGRLARAVKRLVVRVTHRTNLKE-IIGVSASSARSTMINVDGNPVSVEKYFMDRYHIRLHFPKLPLVNLGGRNTESWVPMELCELAPGQPYRGPDRSNTSTIRIKAVVRPDVRMNGIQRLRESLNFESDPFLKAFGLSVAERMEGAGARVLAAPDIKYGNCLHHPRNESWNLQGKTFVKPCTLSNWGVVVCRCVTRQVAQRFVATLCREAVNRGIQVANRNPVLVSSEDRGS-LESWLTTCHDRLERSSRGDPQLIIVIKADEDAMEYQEIKRTMHSILGMPCQCITAGVLARAKVQVLANICLKINAKLGGRNAEFESTLPLMHDEPTILIGADVCYPKMDKANRPPISSVTASLDRHSSMYAARLSVRSKHNDYSHLPQMLWELFIEHYKHSRRQPKHVVYYRSGVSASRVEDVVEAEMQSLRKAFRMLAADYEPRVTFVVANKHHHVRLAGASRNERDRSGNPVPGTIVDSGLADPQRIEFFLMGHSGIQGTSVPTQYTVMVDENGLSADQIEELTYRLCYSYARCTRSVSIVPPLYYAQLAAEHALGSLS
>Py_arrhAGO3
DGP--------------REFFKYDVAAQNDDKA---QLPKRLMRVVVSELLLQNEPVLKCVRVVHDGMAGLYSPMRLDWQAKTFS-----------------RLVESIDVTHLRAR---RVATVPAIQALDVVLRHLGSQRCTAIGSSLFSFKKPMPLDRTKELNAGRYQSVR---RGLFLNMDTVASVFYAPGPLLDLLREVAGVEELVA----CRARWASAVQRLSVRVTHRPAPAQTIREVGEQDAAHTMVAPRHRRD----------------------------YEDTAP----------RCASMENVDTAAIIKHTCVKPDQRKRAIEDGLRDAAFENDPFREAFGVEISSRMERVAAKTLQPPELDVKDHVVRPAHGAWNLSQHKYYRARRLYAWYVVNLSSSSPQAVERFIVRLIGELQRCGIDVRDRQPVIISRDRRG--IESLMRDGYERAM-------------------------RRTGGEYLDL--------------VVYLGNVALKINLKLRGINFALARPLRVLSRSTTIVFGADVEYARS--RHVPAIAA--------------------------------------FEERAGARPDRIIYFRGGTSEGQMDDVFQAEAKAIDDAWTMLAGPHTPPVTFVVVTRHHHVRAFPCSRGDADRSGNPPAGTVIDRTVVDPERFEFYLYGHSGLLGTSRPAHYTVLLNENELGESEMEQLCYDLCHMFGRSTRSVSVVAPVYYAKLFAARARFLLG
>Ph_cinnAGO9
ELARLKVNCLEVWLDSQSSIMRAQMNLRK----IGGASPHALMRRMVNAEYRQYPTCFGGVQVVYDGASRMYSPMLLSWAAKRFENVDPDSVNRGGTFVVRMKLADFVTVKQLADYYSSNVTVSPALQVLGVILRCSAVHRLFSVKRIFFSM-----------------------------------------------MTKCWRLSAISVLADWERNKPAQALRMIEADPTYRNGLKYRIYSVRPTSASETRVSYCGKAISVAEYFSMRHDIQLRHPNLRLVNASRNRREMWLPIELCEVAPGQRKRGLNSLETADNTKQMRSFYNASLETVIEQ--------------------PHLATVNARVISPPEVQFTNASSRPMNATWNLRGKKFVEGAILRNWGVVIFSSIGEGNVRTFVCNLVGMGKECRL-------------------------------------------IEDSKCAESYGNIKRMSDTVLGIPCQCLVSSKILTAKPHYYASLCL--NMKLGDTNGVERDLLPFANT-----------------------TALLAETDCYSAKHVTRAAEQKEPGDIQLLSQMLHGLLLTCCQNTGQKPKHAIYYRSGASQDQHFDILQTEMNALRKSFKLLSVDCKPLVT-TPMGYGYESRGSSSGYDDLNRRGSLGGDSTSSSSLREYESSRGGSYGSSGSQGDS----YSGRYSEYGYNDRNISSSSGH--------GRDDS--------------AR----
